# Supplementary material for: Southwestward growth of plateau surfaces in eastern Tibet
Source: Research Square preprint supplement (doi:10.21203/rs.3.rs-89539/v1), 2020-10-16
Supplement: Supplementary file 1 [file 9bfd63b7add1ef9311d11783.pdf]

Table S2 Thermal history model input table modified from Flowers et al. (2015) <sup>1</sup>.

|                                                                                                                                                                |                                                                                                                                     |
|----------------------------------------------------------------------------------------------------------------------------------------------------------------|-------------------------------------------------------------------------------------------------------------------------------------|
| <b>1. Thermochronological data</b>                                                                                                                             |                                                                                                                                     |
| <i>Samples and data used in simulations</i>                                                                                                                    |                                                                                                                                     |
| <b>Zuogong plateau</b>                                                                                                                                         |                                                                                                                                     |
| ZHe data: CD272, CD274, CD276                                                                                                                                  |                                                                                                                                     |
| AHe date: CD272, CD273, CD274, CD275, CD276, CD277, CD279, CD280, CD282                                                                                        |                                                                                                                                     |
| AFT ages and lengths: CD272, CD273, CD274, CD275, CD276, CD277, CD279, CD280, CD282                                                                            |                                                                                                                                     |
| <b>Markam plateau</b>                                                                                                                                          |                                                                                                                                     |
| AHe data: CD260                                                                                                                                                |                                                                                                                                     |
| AFT ages and lengths: CD260                                                                                                                                    |                                                                                                                                     |
| <b>Weixi plateau</b>                                                                                                                                           |                                                                                                                                     |
| ZHe data <sup>a</sup> : CD252, WX11_03*, WX11_07*, WX11_08*, WX11_10*                                                                                          |                                                                                                                                     |
| AHe data <sup>a</sup> : CD253, CD255, WX11_03*, WX11_07*, WX11_08*, WX11_10*                                                                                   |                                                                                                                                     |
| AFT ages and lengths: CD252, CD253, CD254                                                                                                                      |                                                                                                                                     |
| <i>Data treatment, uncertainties, and other relevant constraints for all samples</i>                                                                           |                                                                                                                                     |
| Treatment: the individual crystals of the samples collected from the low-relief surfaces as input for bulk constraints in QTQt.                                |                                                                                                                                     |
| He data (Ma): Mean uncorrected He dates of each sample.                                                                                                        |                                                                                                                                     |
| Fission-track annealing and He diffusion algorithms are from Ketcham et al. (2007) <sup>2</sup> and Gautheron et al. (2009) <sup>3</sup> , respectively.       |                                                                                                                                     |
| For zircons with potential radiation damage (cf., having negative eU and age relationship), the diffusion model is from Guenthner et al. (2013) <sup>4</sup> . |                                                                                                                                     |
| Error (Ma) applied in modeling: The 1 $\sigma$ sample standard deviation of each sample was applied.                                                           |                                                                                                                                     |
| Grain dimensions ( $\mu\text{m}$ ): Mean length and width of apatite crystals were used (Dataset S1).                                                          |                                                                                                                                     |
| Rs ( $\mu\text{m}$ ): Mean equivalent spherical radius of zircon crystals for each sample (Dataset S2).                                                        |                                                                                                                                     |
| <b>2. Additional geological information</b>                                                                                                                    |                                                                                                                                     |
| <i>Assumption</i>                                                                                                                                              | <i>Explanation and data source</i>                                                                                                  |
| At present temperature of $10 \pm 10$ °C by 0 Ma                                                                                                               | Modern annual ground surface temperature in eastern Tibet from National Climate Center of China Meteorological Administration (CMA) |

|                                                                                                          |                                                                                                                                                                                                   |
|----------------------------------------------------------------------------------------------------------|---------------------------------------------------------------------------------------------------------------------------------------------------------------------------------------------------|
|                                                                                                          | ( <a href="http://www.nmic.cn/">http://www.nmic.cn/</a> ).                                                                                                                                        |
| Simulations begin at near surface temperatures of $20 \pm 10$ °C at $35 \pm 5$ Ma for the Markam plateau | The sampled rocks must be exhumed to the surface because volcanic rocks were in angular contact with the underlying Mesozoic sediments around ~35 Ma (Su et al., 2018 <sup>5</sup> ; Dataset S4). |
| Simulations begin at peak temperatures of $750 \pm 50$ °C at $210 \pm 10$ Ma for the Zuogong plateau     | Based on the intrusion ages of the Zuogong batholith ranging from $214 \pm 3$ to $216 \pm 2$ Ma dated by zircon U-Pb (Dataset S4).                                                                |
| Simulations begin at peak temperatures of $750 \pm 50$ °C at $230 \pm 10$ Ma for the Weixi plateau       | Based on the intrusion ages of the Weixi batholith ranging from $232 \pm 9$ Ma dated by zircon U-Pb (Dataset S4).                                                                                 |
| <b>3. System- and model-specific parameters</b>                                                          |                                                                                                                                                                                                   |
| Modeling code                                                                                            | QTQt 5.5.0                                                                                                                                                                                        |
| Number of burn-in and post-burn-in iterations attempted                                                  | Each 1,000,000 for all simulations                                                                                                                                                                |
| Reheating allowed or not.                                                                                | No reheating for simulations of Zuogong, Weixi and Markam samples                                                                                                                                 |
| Data source:                                                                                             |                                                                                                                                                                                                   |
| * Liu-Zeng et al. (2018) <sup>6</sup> , see Table S1.                                                    |                                                                                                                                                                                                   |

## References

1. Flowers, R. M., Farley, K. A. & Ketcham, R. A. A reporting protocol for thermochronologic modeling illustrated with data from the Grand Canyon. *Earth Planet. Sc. Lett.* **432**, 425-435 (2015).
2. Ketcham, R. A., Carter, A., Donelick, R. A., Barbarand, J. & Hurford, A. J. Improved modeling of fission-track annealing in apatite. *Am. Mineral.* **92**, 799-810 (2007).
3. Gautheron, C., Tassan-Got, L., Barbarand, J. & Pagel, M. Effect of alpha-damage annealing on apatite (U–Th)/He thermochronology. *Chem. Geol.* **266**, 157-170 (2009).
4. Guenthner, W. R., Reiners, P. W., Ketcham, R. A., Nasdala, L. & Giester, G. Helium diffusion in natural zircon: Radiation damage, anisotropy, and the interpretation of zircon (U–Th)/He thermochronology. *Am. J. Sci.* **313**, 145-198 (2013).
5. Su, T. et al. Uplift, climate and biotic changes at the Eocene–Oligocene transition in south-eastern Tibet. *National Science Review*, 1-10 (2018).
6. Liu-Zeng, J. et al. Multiple episodes of fast exhumation since Cretaceous in southeast Tibet, revealed by low-temperature thermochronology. *Earth Planet. Sc. Lett.* **490**, 62-76 (2018).
