# Supplementary material for: Southwestward growth of plateau surfaces in eastern Tibet
Source: Research Square preprint supplement (doi:10.21203/rs.3.rs-89539/v1), 2020-10-16
Supplement: Supplementary file 1 [file 07385db33946f9b9cf0f3b16.xlsx]

## Sheet: Sheet1
	Dataset S4. Zircon U-Pb geochronologic data analyzed by Laser-Ablation ICP Mass Spectrometery
					Isotopic ratios					Apparent ages (Ma)
	Sample #	U	Th	U/Th	207Pb*	±	206Pb*	±	error	206Pb*	±	207Pb*	±	207Pb*	±	Best age	±
	Analysis	(ppm)	(ppm)		235U	(%)	238U	(%)	corr.	238U	(Ma)	235U	(Ma)	206Pb*	(Ma)	(Ma)	(Ma)	Discordance
	CD272
	CD272-1	1209.06	354.131	3.41415	0.379452	0.0151711	0.0370645	0.000364272	0.245813	234.612	2.26786	326.635	11.1693	1055.25	84.1075	234.612	2.26786	0.28173
	CD272-2	860.758	317.743	2.70897	0.266795	0.0127411	0.0346133	0.000359025	0.217196	219.357	2.24013	240.128	10.2138	461.155	109.248	219.357	2.24013	0.086498
	CD272-3	1002.8	367.469	2.72894	0.345992	0.0213703	0.0358795	0.000441754	0.199337	227.242	2.75183	301.702	16.1225	875.925	108.332	227.242	2.75183	0.246801
	CD272-4	984.525	273.276	3.60268	0.258278	0.0111308	0.0356888	0.000364691	0.237112	226.054	2.27322	233.278	8.98355	298.21	98.1325	226.054	2.27322	0.0309664
	CD272-5	2019.12	184.846	10.9233	0.252853	0.00775413	0.0330348	0.00024295	0.239817	209.514	1.52029	228.891	6.28631	433.38	73.14	209.514	1.52029	0.084654
	CD272-6	824.121	368.74	2.23497	0.267991	0.0133456	0.0343207	0.000362332	0.211998	217.534	2.26129	241.086	10.6881	464.86	107.395	217.534	2.26129	0.0976939
	CD272-7	1025.25	214.03	4.79024	0.6787	0.0349529	0.0367824	0.000484458	0.255748	232.858	3.01485	525.988	21.1447	2092.28	74.535	232.858	3.01485	0.557295
	CD272-8	820.081	419.505	1.95488	0.233905	0.00987492	0.0326866	0.000371179	0.268979	207.341	2.31974	213.417	8.12739	294.505	96.2825	207.341	2.31974	0.0284696
	CD272-9	1484.22	308.777	4.80678	0.227212	0.00836815	0.0332976	0.000275377	0.224552	211.154	1.72177	207.895	6.92517	172.305	88.875	211.154	1.72177	0.0156746
	CD272-10	684.387	293.575	2.33121	0.377899	0.0180732	0.0353187	0.000365368	0.216305	223.75	2.27817	325.491	13.3201	1127.79	94.4425	223.75	2.27817	0.312576
	CD272-11	1180.49	245.688	4.80485	0.265184	0.0102311	0.0338669	0.00032344	0.247538	214.705	2.02006	238.836	8.21268	500.04	95.3575	214.705	2.02006	0.101036
	CD272-12	557.646	267.322	2.08604	0.988099	0.0324102	0.0397263	0.000439677	0.337423	251.136	2.72942	697.75	16.5597	2657.72	60.3425	251.136	2.72942	0.640077
	CD272-13	1134.75	338.243	3.35483	0.255849	0.0107408	0.032391	0.00028989	0.213185	205.495	1.81352	231.316	8.6856	501.89	90.73	205.495	1.81352	0.111624
	CD272-14	1168.41	344.2	3.39456	0.703596	0.0199938	0.035785	0.000381794	0.375453	226.653	2.37932	540.936	11.9225	2250.01	42.13	226.653	2.37932	0.580998
	CD272-15	1312.89	490.537	2.67644	0.272787	0.00920912	0.0339789	0.000341035	0.2973	215.403	2.12938	244.919	7.34859	553.74	78.5375	215.403	2.12938	0.120516
	CD272-16	1644.87	146.197	11.251	0.293065	0.0148845	0.0340755	0.000340316	0.196639	216.005	2.12473	260.969	11.6895	642.61	99.985	216.005	2.12473	0.172295
	CD272-17	1214.43	377.242	3.21922	0.273384	0.0105603	0.0335329	0.000309626	0.239035	212.622	1.93463	245.396	8.42236	575.96	85.17	212.622	1.93463	0.133556
	CD272-18	1918.43	335.294	5.72162	0.266202	0.00690547	0.0330386	0.000253786	0.296118	209.538	1.58772	239.653	5.53998	542.63	57.3975	209.538	1.58772	0.125662
	CD272-19	1218.97	337.016	3.61695	0.463727	0.0265402	0.0371487	0.000462836	0.217692	235.135	2.87957	386.847	18.4127	1361.11	96.765	235.135	2.87957	0.392175
	CD272-20	936.326	427.259	2.19147	0.498115	0.0357179	0.0356987	0.000420906	0.164429	226.116	2.62266	410.426	24.2102	1550.01	117.127	226.116	2.62266	0.44907
	CD274
	CD274-1	692.291	416.131	1.66364	0.249577	0.0124071	0.0334863	0.000372014	0.223475	212.331	2.32328	226.233	10.0829	390.79	86.1025	212.331	2.32328	0.0614485
	CD274-2	2481.04	345.661	7.17767	0.248165	0.00679288	0.0354185	0.00028954	0.298653	224.372	1.80672	225.085	5.52813	233.4	60.175	224.372	1.80672	0.00316709
	CD274-3	368.885	256.682	1.43713	0.261447	0.0216859	0.034207	0.000497517	0.175348	216.825	3.10333	235.832	17.4564	442.64	180.532	216.825	3.10333	0.080598
	CD274-4	480.225	297.247	1.61558	0.261486	0.0173048	0.0340259	0.000476049	0.21141	215.696	2.97011	235.864	13.9297	453.75	146.28	215.696	2.97011	0.0855062
	CD274-5	841.155	375.446	2.24041	0.21743	0.0119977	0.034374	0.000397183	0.209402	217.866	2.47811	199.769	10.0075	error	error	217.866	2.47811	0.09059
	CD274-6	632.578	494.061	1.28036	0.256071	0.0125882	0.0348253	0.00040263	0.235185	220.677	2.511	231.496	10.1772	366.72	118.507	220.677	2.511	0.0467323
	CD274-7	1378.01	425.053	3.24198	0.22242	0.00960592	0.0341424	0.000379449	0.257332	216.422	2.36821	203.922	7.98021	57.5	96.29	216.422	2.36821	0.0613019
	CD274-8	577.404	344.831	1.67446	0.258555	0.0142462	0.0341333	0.000491065	0.261105	216.365	3.06335	233.502	11.4947	431.53	134.245	216.365	3.06335	0.0733897
	CD274-9	831.558	332.937	2.49764	0.250575	0.0108774	0.0332106	0.000347908	0.241324	210.611	2.17365	227.043	8.83304	435.23	136.095	210.611	2.17365	0.0723732
	CD274-10	649.508	358.916	1.80964	0.25015	0.0124878	0.0341804	0.000411735	0.241298	216.659	2.56915	226.698	10.1439	338.945	114.802	216.659	2.56915	0.0442857
	CD274-11	958.273	324.28	2.95508	0.252551	0.0109718	0.0337342	0.000335219	0.228733	213.877	2.09363	228.647	8.8957	388.94	101.84	213.877	2.09363	0.0645943
	CD274-12	2615.02	312.99	8.35495	0.227847	0.00571314	0.0338364	0.00024752	0.291739	214.514	1.54774	208.42	4.72668	200.075	61.105	214.514	1.54774	0.0292425
	CD274-13	1525.06	211.831	7.19941	1.13832	0.0237227	0.121463	0.000919425	0.363222	738.978	5.3001	771.711	11.277	858.94	42.5925	738.978	5.3001	0.0424153
	CD274-14	519.013	322.291	1.61039	0.228123	0.0149919	0.0339774	0.000469357	0.210197	215.393	2.92855	208.648	12.3958	131.57	148.12	215.393	2.92855	0.0323287
	CD274-15	551.401	271.848	2.02834	0.234089	0.0143872	0.0337082	0.000465359	0.224625	213.715	2.90437	213.568	11.8384	231.55	144.425	213.715	2.90437	0.000685338
	CD274-16	690.31	522.217	1.32189	0.257168	0.0135626	0.0354403	0.000442725	0.23687	224.508	2.75897	232.382	10.9553	305.615	118.502	224.508	2.75897	0.0338845
	CD274-17	536.772	280.956	1.91052	0.247674	0.0136968	0.0335553	0.000470217	0.253396	212.761	2.93505	224.685	11.1478	372.275	119.433	212.761	2.93505	0.0530667
	CD274-18	1099.36	343.383	3.20157	0.242015	0.00905202	0.0323732	0.000306827	0.253398	205.384	1.91911	220.069	7.4018	375.98	78.695	205.384	1.91911	0.0667277
	CD274-19	918.466	426.544	2.15327	0.231763	0.0101183	0.034644	0.000381957	0.252537	219.548	2.38276	211.653	8.34206	146.38	105.54	219.548	2.38276	0.0373022
	CD274-20	3462.7	670.3	5.16589	0.244046	0.00716626	0.0338323	0.000249014	0.250653	214.489	1.55703	221.728	5.851	287.1	66.66	214.489	1.55703	0.0326507
	CD280
	CD280-1	2110.76	684.714	3.08269	0.249695	0.00795027	0.0333116	0.000263761	0.248681	211.241	1.64945	226.328	6.46147	372.275	74.0675	211.241	1.64945	0.0666609
	CD280-2	8103.61	2096.04	3.86616	0.217646	0.00489062	0.0295842	0.000227422	0.342105	187.946	1.42754	199.949	4.0805	324.13	21.295	187.946	1.42754	0.0600328
	CD280-3	2051.24	682.133	3.00709	0.261441	0.00869239	0.0337135	0.000295711	0.263814	213.748	1.84771	235.827	6.99868	435.23	74.0675	213.748	1.84771	0.0936252
	CD280-4	6860.71	2050.65	3.34563	0.222866	0.00516287	0.0302137	0.00032262	0.460936	191.885	2.0214	204.292	4.28914	327.835	49.995	191.885	2.0214	0.0607312
	CD280-5	2550.96	760.048	3.35631	0.228786	0.00631768	0.0330616	0.000246908	0.270447	209.681	1.54489	209.196	5.22243	187.12	64.8025	209.681	1.54489	0.00231989
	CD280-6	7488.79	1768.44	4.23469	0.203498	0.00478972	0.0281953	0.000359013	0.540983	179.243	2.25296	188.082	4.04308	287.1	54.625	179.243	2.25296	0.0469921
	CD280-7	4243.32	1585.09	2.67703	0.23081	0.00542776	0.0333109	0.000245899	0.31391	211.237	1.5383	210.867	4.48004	190.82	27.7725	211.237	1.5383	0.00175494
	CD280-8	5633.29	3397.39	1.65812	0.20905	0.00509052	0.0323101	0.000338444	0.430165	204.99	2.11636	192.755	4.27713	35.28	64.81	204.99	2.11636	0.0634773
	CD280-9	8365.53	2031.27	4.11838	0.282418	0.00736983	0.0295489	0.000212014	0.274952	187.724	1.33137	252.574	5.83776	903.39	52.78	187.724	1.33137	0.256754
	CD280-10	3409.19	933.399	3.65245	0.372113	0.0148958	0.0346019	0.000271903	0.196302	219.286	1.69831	321.218	11.0253	1099.08	69.445	219.286	1.69831	0.31733
	CD280-11	3081.63	1057.53	2.914	0.258536	0.00647871	0.0362056	0.000276344	0.304585	229.27	1.72364	233.487	5.22941	261.175	52.77	229.27	1.72364	0.0180571
	CD280-12	4775.78	2413.29	1.97895	0.226365	0.00536805	0.0329525	0.000214692	0.274738	209	1.34459	207.193	4.44678	172.305	54.62	209	1.34459	0.00872207
	CD280-13	4291.5	2009.51	2.13559	0.340512	0.0101265	0.0356151	0.000242895	0.229327	225.596	1.51685	297.559	7.6731	895.99	67.5925	225.596	1.51685	0.241847
	CD280-14	3361.91	1160.25	2.89757	0.246656	0.00599879	0.0338917	0.000275927	0.334757	214.859	1.72434	223.856	4.8883	301.91	55.55	214.859	1.72434	0.0401915
	CD280-15	2270.11	1071.14	2.11933	0.240526	0.00754757	0.0343592	0.000294005	0.272689	217.773	1.83609	218.851	6.17955	213.035	72.21	217.773	1.83609	0.00492594
	CD280-16	9406.78	1658.15	5.67307	0.208914	0.00455346	0.0286134	0.000246512	0.395272	181.864	1.54803	192.641	3.82675	305.615	46.2925	181.864	1.54803	0.0559422
	CD280-17	6795.13	1617.82	4.20017	0.246226	0.00608782	0.0323196	0.000371164	0.464485	205.049	2.32041	223.506	4.96248	398.2	52.7725	205.049	2.32041	0.0825771
	CD280-18	3906.83	1246.95	3.1331	0.247574	0.0057418	0.0348729	0.000252233	0.311869	220.974	1.57573	224.604	4.67566	250.065	55.545	220.974	1.57573	0.0161602
	CD280-19	4271.23	794.403	5.37665	0.241994	0.00567342	0.0340261	0.000223709	0.280434	215.697	1.39952	220.052	4.64068	255.62	53.6925	215.697	1.39952	0.0197893
	CD280-20	3591.04	1298.8	2.76489	0.238936	0.00599219	0.0335876	0.000249815	0.296574	212.963	1.56231	217.548	4.91319	255.62	59.2475	212.963	1.56231	0.0210783
	Note: Ages >50 Ma that are >10% discordant are not considered reliable (with strikeout). All errors are at the 1-sigma level.
