# Supplementary material for: Southwestward growth of plateau surfaces in eastern Tibet
Source: Research Square preprint supplement (doi:10.21203/rs.3.rs-89539/v1), 2020-10-16
Supplement: Supplementary file 2 [file 1c00792885b7792f218cfd80.xlsx]

## Sheet: Sheet1
Dataset S1. Apatite fission track data.
Sample	N	Spontaneous		Induced		Dosimeter		P(χ2)	U content	Central age	Projected track length, Dpar and Dper
		ρs	Ns	ρi	Ni	ρd	Nd		± 2σ (ppm)	Central age ± 2σ (Ma)	Mean	n	Dpar	Dper
		(×106 m-2)		(×106 m-2)		(×106 m-2)					± 2σ (µm)		(µm)	(µm)
CD252	20	2.2	1074	2.49	1214	1.087	3472	65	34 ± 2	118 ± 12	13.91 ± 1.01	88	2.62	0.74
CD253	20	3.38	1657	4.76	2335	1.09	3484	12	65 ± 3	95.0 ± 7.8	14.22 ± 1.11	100	2.17	0.61
CD254	20	1.22	310	2.68	680	1.093	3495	73	37 ± 3	61.3 ± 8.9	13.91 ± 0.91	20	1.86	0.46
CD260	20	0.84	240	1.47	424	1.097	3506	85	20 ± 2	76.3± 12.7	14.42 ± 0.98	79	2.04	0.51
CD272	20	0.46	381	2.98	1300	1.1	3517	87	41 ± 2	20.9 ± 2.5	14.48 ± 1.04	100	2.03	0.5
CD273	20	0.26	249	1.62	1490	1.103	3528	88	22 ± 1	22.0 ± 3.2	14.21 ± 0.97	100	1.69	0.36
CD274	20	1.4	794	9.19	5210	1.107	3539	53	125 ± 5	20.8 ± 1.9	14.55 ± 0.89	100	2.14	0.59
CD275	20	0.22	161	1.83	1361	1.11	3551	95	25 ± 1	16.2 ± 2.8	14.58 ± 0.88	100	1.69	0.36
CD276	20	0.47	306	4.23	2754	1.113	3562	90	57 ± 3	15.3 ± 2.0	14.61 ± 0.75	101	1.9	0.45
CD277	20	1.14	700	6.48	3993	1.117	3573	61	87 ± 4	24.2 ± 2.4	14.73 ± 0.74	104	2	0.53
CD279	20	4.06	94	3.17	734	1.12	3584	100	42 ± 3	17.7 ± 3.9	14.92 ± 0.84	15	1.58	0.39
CD280	20	0.45	97	2.62	570	1.123	3595	97	35 ± 3	23.6 ± 5.2	14.64 ± 0.72	20	1.56	0.34
CD282	20	1.46	525	7.95	2859	1.127	3606	16	106 ± 5	25.6 ± 2.7	14.58 ± 0.93	99	1.77	0.38
Note: All samples were prepared and dated using the external detector method. AFT ages were calculated by T.Y. Shen using ζ-IRRM540R=247.5±6.1 (±1σ) at ISTerre, Université Grenoble Alps, France. All reported ages are central ages with ±2 standard deviation in 95% confidence interval. N: total number of dated grains. P(χ2), probability of obtaining χ2 value for υ degrees of freedom (υ=N-1).
