# Supplementary material for: Southwestward growth of plateau surfaces in eastern Tibet
Source: Research Square preprint supplement (doi:10.21203/rs.3.rs-89539/v1), 2020-10-16
Supplement: Supplementary file 3 [file 844a8b61c42e949f7b52a49c.xlsx]

## Sheet: AHe
Dataset S5A. A collection of available apatite (U-Th)/He around the eastern Himalaya syntaxis.
Sample NO	Longitude	Latitude	Elevation (m)	Age (Ma)	Error	Reference
CD282	97.9599	29.7323	4703	29	3	This study
CD280	98.0137	29.7181	4991	27	6	This study
CD279	98.0459	29.7234	4822	12	2	This study
CD275	98.1663	29.5995	4020	25	5	This study
CD274	98.1814	29.5791	3894	20	3	This study
CD273	98.1936	29.5608	3757	28	4	This study
CD272	98.2099	29.5531	3622	22	3	This study
CD270	98.303	29.551	3868	15	4	This study
CD260	98.5356	29.6949	4325	41	5	This study
CD253	99.3463	27.3608	2703	62	4	This study
CD255	99.347	27.4731	2376	31	3	This study
CD145	99.5034	27.0696	2635	35.85	3.2	Cao et al., 2020, GSA Bulletin
CD148	99.4927	27.1031	2939	41.67	2.58	Cao et al., 2020, GSA Bulletin
MC-01-44	100.126	29.3575	4420	101.71	38.43	Clark et al., 2005, Geology
MC-01-43	100.195	29.4605	4620	91.39	3.04	Clark et al., 2005, Geology
MC-01-42	100.269	29.5162	4640	92.29	41.81	Clark et al., 2005, Geology
MC-01-41	100.276	29.5322	4500	111.91	30.05	Clark et al., 2005, Geology
MC-01-40	100.317	29.5741	4200	112.3	23.14	Clark et al., 2005, Geology
MC-01-38	100.345	29.6346	3980	60.07	19.28	Clark et al., 2005, Geology
MC-01-37	100.353	29.6446	3860	50.04	0.83	Clark et al., 2005, Geology
MC-01-49	101.532	30.1241	4000	57.63	6.11	Clark et al., 2005, Geology
MC-01-11	101.93	31.198	2840	8.1	1.69	Clark et al., 2005, Geology
MC-01-12	101.926	31.1951	2580	6.08	0.95	Clark et al., 2005, Geology
MC-01-13	101.924	31.1937	2500	5.65	0.28	Clark et al., 2005, Geology
MC-01-14	101.929	31.2042	3000	9.35	3.76	Clark et al., 2005, Geology
MC-01-15	101.932	31.1733	2100	5.5	0.52	Clark et al., 2005, Geology
MC-01-25	101.751	28.5425	1700	4.6	1.1	Clark et al., 2005, Geology
MC-01-26	101.748	28.5342	1620	10.78	2.35	Clark et al., 2005, Geology
MC-01-27	101.734	28.552	1950	5.02	1.68	Clark et al., 2005, Geology
MC-01-28	101.64	28.6533	2100	3.16	0.19	Clark et al., 2005, Geology
MC-01-29	101.603	28.8347	2550	8.32	2.76	Clark et al., 2005, Geology
MC-01-30	101.573	28.8742	2750	10.05	7.8	Clark et al., 2005, Geology
MC-98-17	102.093	28.1985	1650	16.98	9.45	Clark et al., 2005, Geology
MC-98-18	102.132	27.7119	1750	19.47	3.03	Clark et al., 2005, Geology
MC-98-19	102.096	27.7059	2200	18.18	2.16	Clark et al., 2005, Geology
MC-98-9	102.387	27.1724	1050	5.09	4.49	Clark et al., 2005, Geology
MC-98-10	102.36	29.1474	1150	17.04	9.15	Clark et al., 2005, Geology
MC-98-11	102.341	29.1282	1200	18.14	2.5	Clark et al., 2005, Geology
MC-98-12	102.34	29.0886	1450	21.03	8.46	Clark et al., 2005, Geology
MC-98-06	102.223	29.8886	1400	2.5	0.17	Clark et al., 2005, Geology
MC-98-07	102.17	29.5543	1150	0.42	0.38	Clark et al., 2005, Geology
MC-98-13	102.3	28.9951	1800	6.08	2.47	Clark et al., 2005, Geology
MC-98-14	102.298	28.9011	2600	11.44	6.72	Clark et al., 2005, Geology
MC-01-52	101.995	30.0615	2520	2.45	0.15	Clark et al., 2005, Geology
MC-01-54	102.072	30.0815	2000	1.8	0.07	Clark et al., 2005, Geology
MC-01-55	102.126	30.0672	1640	3.35	1.02	Clark et al., 2005, Geology
KC07-53	102.86	30.38	2400	9.31	0.87	Cook et al., 2013, Lithosphere
KC07-54	102.85	30.37	1740	10.1	0.14	Cook et al., 2013, Lithosphere
KC07-55	102.82	30.37	1175	6.46	1.44	Cook et al., 2013, Lithosphere
KC07-58	102.8	30.35	960	4.7	0.87	Cook et al., 2013, Lithosphere
KC05-11	102.88	30.46	1240	5.16	0.93	Cook et al., 2013, Lithosphere
KC05-14	102.91	30.53	1350	3.8	0.67	Cook et al., 2013, Lithosphere
KC05-15	102.83	30.41	1249	6.4	1.45	Cook et al., 2013, Lithosphere
KC07-56	102.76	30.42	1062	4.37	0.38	Cook et al., 2013, Lithosphere
KC07-57	102.88	30.58	1575	4.26	0.5	Cook et al., 2013, Lithosphere
KC05-10	102.84	30.51	1800	3.3	0.37	Cook et al., 2013, Lithosphere
D27	92.1678	31.9658	4944	65.9	6.4	Dai et al., 2013, JGS
D28	92.0669	31.7847	4765	63.1	11	Dai et al., 2013, JGS
D30	92.6819	31.7378	4480	35.7	9.4	Dai et al., 2013, JGS
D32	93.5553	31.8325	4450	15	0.8	Dai et al., 2013, JGS
D55	97.3656	33.1617	3938	54.7	13	Dai et al., 2013, JGS
D56	96.7975	33.7928	4322	62.9	1.3	Dai et al., 2013, JGS
D58	98.6539	35.0525	4422	74.7	19	Dai et al., 2013, JGS
D57	97.675	34.1389	4727	73.5	23	Dai et al., 2013, JGS
D44	96.5583	32.3092	3972	58.7	17	Dai et al., 2013, JGS
D11	92.3836	34.1564	4648	50.5	7	Dai et al., 2013, JGS
D36	96.4453	32.31	3885	16.3	2.5	Dai et al., 2013, JGS
D45	96.5442	32.1475	3626	15	3.2	Dai et al., 2013, JGS
D03	97.9653	33.0769	4195	45.2	18	Dai et al., 2013, JGS
SYX01	102.477	28.2646	1909	9.18	0.5	Deng et al., 2015, IJES
SYX06	102.535	28.2164	2032	7.43	4	Deng et al., 2015, IJES
SS22	102.726	28.9639	1064	7.88	2.9	Deng et al., 2015, IJES
SS23	102.719	28.9501	1323	6.72	0.06?	Deng et al., 2015, IJES
SS24	102.714	28.9479	1352	8.12	0.4?	Deng et al., 2015, IJES
SS25	102.713	28.9452	1360	7.92	3.6	Deng et al., 2015, IJES
SS26	102.715	28.9301	1376	6.71	1.6	Deng et al., 2015, IJES
SQM05	103.894	29.008	360	11-50	0.6-2.5?	Deng et al., 2015, IJES
SQM11	103.872	28.8867	569	26.5	12?	Deng et al., 2015, IJES
SQM07	103.882	28.9032	476	21.8	6.1	Deng et al., 2015, IJES
SQM08	103.878	28.8934	494	15.9	4.9	Deng et al., 2015, IJES
SQM10	103.896	28.8973	583	9.85	5.5?	Deng et al., 2015, IJES
SYX18	102.281	28.3052	2186	10	1.9	Deng et al., 2015, IJES
SYX16	102.291	28.3054	2685	9.3-31	0.5-1.5	Deng et al., 2015, IJES
SYX13	102.293	28.3062	2833	19.1-37.7	1.0-1.9	Deng et al., 2015, IJES
SYX11	102.228	28.2964	1673	5.4-30.1	0.3-1.5	Deng et al., 2015, IJES
SYX08	102.348	28.3292	1793	12.4	1.5	Deng et al., 2015, IJES
SS12	103.124	29.3007	565	15.7	6.1?	Deng et al., 2015, IJES
W1425	103.526	31.4149	1439	2.7	0.2	Godard et al., 2009, Tectonics
W1848	103.499	31.4389	1860	2.1	0.2	Godard et al., 2009, Tectonics
W2093	103.504	31.4373	1956	2.3	0.2	Godard et al., 2009, Tectonics
SC062	103.898	31.351	1726	4.8	0.4	Godard et al., 2009, Tectonics
SC065	103.854	31.3568	1927	4.6	0.4	Godard et al., 2009, Tectonics
S16X15	99.9398	28.99	3666	11.42	1.06	Gourbet et al., 2019, Lithoshere
S16X16	99.9347	28.9919	3595	13.1	1.33	Gourbet et al., 2019, Lithoshere
S16X17	99.9238	28.9952	3503	14.59	5.32	Gourbet et al., 2019, Lithoshere
S16X14	99.8393	28.9694	2829	21.1	6.88	Gourbet et al., 2019, Lithoshere
S16X08	99.9533	28.7984	3924	40.59	4.73	Gourbet et al., 2019, Lithoshere
S16X05	99.9477	28.798	3894	30.58	2.82	Gourbet et al., 2019, Lithoshere
S16X04	99.9402	28.7921	3818	12.81	0.8	Gourbet et al., 2019, Lithoshere
S16X03	99.9344	28.7952	3724	9.76	2.66	Gourbet et al., 2019, Lithoshere
S16X01	99.9275	28.7968	3656	11.85	0.04	Gourbet et al., 2019, Lithoshere
S16X10	99.9204	28.691	3873	10.31	2.25	Gourbet et al., 2019, Lithoshere
S16X11	99.9193	28.6952	3727	8.08	1.95	Gourbet et al., 2019, Lithoshere
S16X09B	99.9155	28.7019	3621	7.85	2.63	Gourbet et al., 2019, Lithoshere
S16X12	99.9117	28.7017	3452	8.21	1.29	Gourbet et al., 2019, Lithoshere
S16X09	99.9076	28.7025	3378	8.53	0.93	Gourbet et al., 2019, Lithoshere
S16X13	99.9058	28.7065	3321	10.05	2.92	Gourbet et al., 2019, Lithoshere
S16X19	99.67482	28.5306	2790	26.34	15.8	Gourbet et al., 2019, Lithoshere
DC-23	90.9415	30.9944	4801	34.8	1.1	Haider et al., 2013, JAES
DC-25	90.6762	31.1641	4699	47.3	1.8	Haider et al., 2013, JAES
DC-28	90.172	31.3746	4680	45.5	2.1	Haider et al., 2013, JAES
DC-40	90.8623	30.9579	4955	38.8	5.2	Haider et al., 2013, JAES
DC-41	90.9395	30.9366	4845	50	2.9	Haider et al., 2013, JAES
H-7	90.082	31.2753	5350	47	4.7	Haider et al., 2013, JAES
H-12	90.1504	31.3281	4750	55.1	1.9	Haider et al., 2013, JAES
H-13	90.0153	31.3293	4714	43.3	1.2	Haider et al., 2013, JAES
H-14	90.1761	31.3136	4830	50.2	4.3	Haider et al., 2013, JAES
H-33	90.151	31.2879	5020	45.4	1.5	Haider et al., 2013, JAES
H-34	90.1428	31.2944	5001	42.4	1.2	Haider et al., 2013, JAES
H-35	90.1469	31.309	4926	54.1	2.3	Haider et al., 2013, JAES
H-45	90.6566	31.151	4700	46.4	2.6	Haider et al., 2013, JAES
H-50	90.7746	31.1043	4831	57.7	5.6	Haider et al., 2013, JAES
H-51	90.7063	31.0367	5062	67.2	15.9	Haider et al., 2013, JAES
H-70	90.5591	31.0527	4841	48.9	1.4	Haider et al., 2013, JAES
H-71B	90.5139	31.1702	4693	48.2	2.6	Haider et al., 2013, JAES
H-72	90.5319	31.143	4603	43.8	0.3	Haider et al., 2013, JAES
H-85	90.3332	31.297	4640	58.4	11.9	Haider et al., 2013, JAES
H-86	90.3545	31.2613	4664	54.9	0.7	Haider et al., 2013, JAES
H-87	90.3544	31.1861	4998	53	1.8	Haider et al., 2013, JAES
H-90	90.6772	31.1817	4770	44.9	3.1	Haider et al., 2013, JAES
H-105	90.1044	31.2885	5333	49.5	1.2	Haider et al., 2013, JAES
H-19	89.7781	31.2078	4830	49	4.7	Haider et al., 2013, JAES
H-20	89.7804	31.2208	5070	61.2	5.3	Haider et al., 2013, JAES
H-21	89.7747	31.2419	5180	46.8	4.4	Haider et al., 2013, JAES
H-22B	89.8383	31.2734	5050	54.2	3.7	Haider et al., 2013, JAES
DC-29	89.5034	31.2889	4733	39.5	1.3	Haider et al., 2013, JAES
DC-38	90.7118	30.9527	4770	40	1.1	Haider et al., 2013, JAES
H-47	90.7132	31.0002	5390	55.7	17.5	Haider et al., 2013, JAES
H-23	89.8048	31.4227	4630	56.2	0.9	Hetzel et al., 2011, Geology
H-24	89.8054	31.4434	4610	56.3	0.7	Hetzel et al., 2011, Geology
H-29	89.8982	31.4433	4970	53.6	1.2	Hetzel et al., 2011, Geology
H-30	89.8959	31.4685	4750	59	3.6	Hetzel et al., 2011, Geology
H-31	89.9194	31.4797	4770	55.4	5.7	Hetzel et al., 2011, Geology
DC-31	89.9208	31.4677	4824	55.1	3.3	Hetzel et al., 2011, Geology
DC-33	90.0143	31.3733	4733	52	0.2	Hetzel et al., 2011, Geology
6-7-05-2	83.5385	31.5787	5147	0.64	0.02	Kapp et al., 2008, Geology
6-7-05-3	83.5397	31.5784	5130	0.48	0.02	Kapp et al., 2008, Geology
6-9-05-2	83.6575	31.8157	4841	5.12	0.18	Kapp et al., 2008, Geology
6-11-05-1A	83.5384	31.6104	5199	1.77	0.05	Kapp et al., 2008, Geology
97-5	102.642	32.203	3749	20.6	1.2	Kirby et al., 2002, Tectonics
97-4	102.927	32.157	2533	19.9	1.2	Kirby et al., 2002, Tectonics
97-2	103.129	32.312	2406	13.4	0.8	Kirby et al., 2002, Tectonics
97-6	102.344	32.675	3508	8.2	0.5	Kirby et al., 2002, Tectonics
93-3	103.47	30.9987	948	4.6	0.7	Kirby et al., 2002, Tectonics
97-14	104.128	32.516	1421	3.2	0.5	Kirby et al., 2002, Tectonics
T12-28	91.32	29.822	5003	6.3	0.5	Li et al., 2016, G-cube
T12-33	92.188	30.098	4302	18	1.3	Li et al., 2016, G-cube
T12-36	92.025	29.981	4982	21.2	1.5	Li et al., 2016, G-cube
T12-40	92.01	30.003	4003	18.1	1.6	Li et al., 2016, G-cube
T12-42	91.91	29.981	3890	22.3	2	Li et al., 2016, G-cube
DQ11-01	98.9616	28.3796	4974	18.9	1	Liu-Zeng et al., 2018, EPSL
DQ11-03	98.9687	28.3728	4704	16.4	3.8	Liu-Zeng et al., 2018, EPSL
DQ11-04	98.972	28.3829	4529	16.4	1.5	Liu-Zeng et al., 2018, EPSL
DQ11-11	98.9263	28.3753	4248	9.8	2.5	Liu-Zeng et al., 2018, EPSL
DQ11-13	98.9176	28.3762	3960	9.5	3.4	Liu-Zeng et al., 2018, EPSL
DQ11-15	98.9091	28.3797	3660	8.6	1	Liu-Zeng et al., 2018, EPSL
TL09-20	98.9224	28.4423	3527	18	1.1	Liu-Zeng et al., 2018, EPSL
DQ11-17	98.8995	28.3814	3360	6.2	1.7	Liu-Zeng et al., 2018, EPSL
DQ11-18	98.8203	28.3861	3130	4.7	2.7	Liu-Zeng et al., 2018, EPSL
TL09-19	98.9051	28.3903	3026	4.7	0.3	Liu-Zeng et al., 2018, EPSL
TL09-18	98.9025	28.3482	2824	3.8	0.2	Liu-Zeng et al., 2018, EPSL
DQ11-22	98.8196	28.4225	2873			Liu-Zeng et al., 2018, EPSL
DQ11-20	98.8203	28.4296	2494	4.4	0.3	Liu-Zeng et al., 2018, EPSL
WX11-01	99.3006	27.4254	3420			Liu-Zeng et al., 2018, EPSL
WX11-03	99.3031	27.4307	3150	50	15	Liu-Zeng et al., 2018, EPSL
TL09-31	99.2723	27.3716	3140			Liu-Zeng et al., 2018, EPSL
TL09-30	99.2892	27.3476	2919	63.37	3.8	Liu-Zeng et al., 2018, EPSL
WX11-07	99.3052	27.4351	2848	53	16	Liu-Zeng et al., 2018, EPSL
TL09-29	99.3466	27.3609	2682	59.2	3.6	Liu-Zeng et al., 2018, EPSL
WX11-08	99.308	27.4478	2620	43	12	Liu-Zeng et al., 2018, EPSL
TL09-28	99.3473	27.4264	2476	38.6	2.3	Liu-Zeng et al., 2018, EPSL
WX11-10	99.3327	27.4629	2439	33.6	1.1	Liu-Zeng et al., 2018, EPSL
TL09-27	99.3504	27.479	2298	16.1	1	Liu-Zeng et al., 2018, EPSL
YN41911	100.251	23.8815	2234	27	1.6	Nie et al., 2018, Nat. Geosci.
YN41910	100.275	23.8547	2099	39	2.3	Nie et al., 2018, Nat. Geosci.
YN4197	100.295	23.8616	1677	19	1	Nie et al., 2018, Nat. Geosci.
YN4194	100.323	23.8555	1206	17	1	Nie et al., 2018, Nat. Geosci.
YN4193	100.337	23.8558	1080	16	0.95	Nie et al., 2018, Nat. Geosci.
YN4192	100.347	23.8485	964	20	1.17	Nie et al., 2018, Nat. Geosci.
WBO-04-15	99.0728	29.484	3100	9	0.7	Ouimet et al., 2010, Liothoshpere
WBO-04-14	99.0698	29.4822	2900	8.8	1.5	Ouimet et al., 2010, Liothoshpere
WBO-04-13	99.0682	29.4798	2700	7.8	1.8	Ouimet et al., 2010, Liothoshpere
WBO-04-10	99.0612	29.4142	2350	7.2	0.1	Ouimet et al., 2010, Liothoshpere
WBO-03-16A	101.235	29.4315	3100	3.6	0.5	Ouimet et al., 2010, Liothoshpere
WBO-04-41A	101.24	29.4479	3700	4.7	0.2	Ouimet et al., 2010, Liothoshpere
WBO-04-41C	101.244	29.4602	4000	5.6	0.8	Ouimet et al., 2010, Liothoshpere
WBO-04-41E	101.228	29.4203	2800	1.7	0.5	Ouimet et al., 2010, Liothoshpere
WBO-04-32C	101.913	31.3871	3700	27.7	11.9	Ouimet et al., 2010, Liothoshpere
WBO-03-20B	101.921	31.378	3200	16.3	3.1	Ouimet et al., 2010, Liothoshpere
WBO-03-20C	101.926	31.374	3000	8.2	1.5	Ouimet et al., 2010, Liothoshpere
WBO-03-20D	101.936	31.3708	2800	8.4	1.9	Ouimet et al., 2010, Liothoshpere
WBO-03-20E	101.942	31.3711	2600	6.6	0.3	Ouimet et al., 2010, Liothoshpere
KW04	98.8106	28.5049	2562	3	1.4	Replumaz et al., 2020, Tectonics
KW06	98.8223	28.4301	2504	2.2	0.3	Replumaz et al., 2020, Tectonics
KW34	98.8688	28.3556	2115	2.2	0.2	Replumaz et al., 2020, Tectonics
KW41	98.7776	28.2063	2694	2.7	0.8	Replumaz et al., 2020, Tectonics
KW42	98.7888	28.2022	2573	2.9	1.2	Replumaz et al., 2020, Tectonics
KW43	98.7932	28.2033	2429	1.5	0.4	Replumaz et al., 2020, Tectonics
KW52	98.8503	28.1982	2060	1.2	0.2	Replumaz et al., 2020, Tectonics
AR1	85.19	33.25	5506	19.1	0.3	Rohrmann et al., 2012, Geology
AR3	84.56	33.76	4923	44.5	2.2	Rohrmann et al., 2012, Geology
AR4	84.12	33.78	4870	37	0.7	Rohrmann et al., 2012, Geology
AR5	84.02	32.78	4583	48.8	0.7	Rohrmann et al., 2012, Geology
AR6	84.24	32.71	4609	51.6	2	Rohrmann et al., 2012, Geology
GT1	85.19	33.25	5308	45.2	1	Rohrmann et al., 2012, Geology
JV1	89.88	31.34	5110	44.8	0.6	Rohrmann et al., 2012, Geology
JV3	84.5	31.5	4783	44.7	1.1	Rohrmann et al., 2012, Geology
JV4	89.89	31.36	5230	52	0.7	Rohrmann et al., 2012, Geology
PK3	89.02	31.41	4608	54.6	1.3	Rohrmann et al., 2012, Geology
PK3A	91.71	32.12	4762	54.4	0.6	Rohrmann et al., 2012, Geology
PK5	89.08	31.5	4563	49.9	0.7	Rohrmann et al., 2012, Geology
PK6	85.17	33.3	5601	27.6	0.4	Rohrmann et al., 2012, Geology
PU1	92.01	33.25	5591	43	0.5	Rohrmann et al., 2012, Geology
SH2	91.14	30.07	4533	14.7	0.2	Rohrmann et al., 2012, Geology
GZ76	100.154	29.394	4464	110.7	7.9	Tian et al., 2014a, JGR
GZ73	100.319	29.0319	3696	75.8	5.5	Tian et al., 2014a, JGR
GZ71	100.344	29.0195	4252	121.9	8.7	Tian et al., 2014a, JGR
GZ78	100.267	29.5138	4535	173	12	Tian et al., 2014a, JGR
GZ68	100.538	29.0384	3442	22	1.2	Tian et al., 2014a, JGR
GZ69	100.636	29.0167	3150	15.1	1.2	Tian et al., 2014a, JGR
HS28	102.56	33.21	3465	44.8	3.9	Tian et al., 2014b, G-cube
HS27	102.65	33.46	3505	76.7	8.4	Tian et al., 2014b, G-cube
HS25	102.88	33.57	3516	64.1	5.6	Tian et al., 2014b, G-cube
HS22	102.95	33.82	3478	110	7.9	Tian et al., 2014b, G-cube
HC1-10	102.65	33.46	-339	82	7.5	Tian et al., 2014b, G-cube
HS87	103.749	32.744	3795	155	11	Tian et al., 2018, Tectonics
HS88	103.734	32.739	4007	12.8	0.6	Tian et al., 2018, Tectonics
LB12-MZ07	92.149	29.7038	4347	11.31		Tremblay et al., 2015, PNAS
LB12-MZ08	92.1448	29.7011	4526	14.02	1.85	Tremblay et al., 2015, PNAS
LB12-MZ09	92.1409	29.6945	4746	15.48	1.22	Tremblay et al., 2015, PNAS
LB12-MZ10	92.137	29.6904	4987	14.7	0.08	Tremblay et al., 2015, PNAS
LB12-MZ11	92.1369	29.6834	5175	15.24	2.34	Tremblay et al., 2015, PNAS
LB12-MZ12	92.1436	29.6773	5478	16.48	2.71	Tremblay et al., 2015, PNAS
LMW-01	103.636	31.3833	4174	22.6	0.7	Wang et al., 2012, Nat. Geosci.
LMW-02	103.64	31.388	4009	0.8	1.1	Wang et al., 2012, Nat. Geosci.
LMW-03	103.645	31.3979	3802	51.7	2	Wang et al., 2012, Nat. Geosci.
LMW-05	103.653	31.4128	3385	44.7	6.1	Wang et al., 2012, Nat. Geosci.
LMW-06	103.653	31.4156	3212	20.9	2.1	Wang et al., 2012, Nat. Geosci.
LMW-07	103.662	31.4309	1908	10.9	0.6	Wang et al., 2012, Nat. Geosci.
LMW-08	103.653	31.443	1670	8.5	1.2	Wang et al., 2012, Nat. Geosci.
LME-09	103.648	31.2907	2900	7.1	2.2	Wang et al., 2012, Nat. Geosci.
LME-11	103.653	31.2874	2500	2.9	0.4	Wang et al., 2012, Nat. Geosci.
LME-13	103.654	31.2853	2100	4.9	1.3	Wang et al., 2012, Nat. Geosci.
LME-14	103.657	31.2848	2000	10.1	1.2	Wang et al., 2012, Nat. Geosci.
LME-15	103.66	31.283	1800	7.7	3.7	Wang et al., 2012, Nat. Geosci.
LME-16	103.652	31.2676	1550	2.1	0.4	Wang et al., 2012, Nat. Geosci.
LME-17	103.647	31.2289	1430	2.5	0.2	Wang et al., 2012, Nat. Geosci.
LME-18	103.644	31.2165	1390	2.9	0.8	Wang et al., 2012, Nat. Geosci.
LME-19	103.659	31.174	1280	4.7	0.7	Wang et al., 2012, Nat. Geosci.
LME-20	103.669	31.1607	1160	4.1	0.5	Wang et al., 2012, Nat. Geosci.
TL09-18A	98.9	28.35	2824	3.8	0.2	Xiao et al., 2015, Acta Petrologica Sinica
TL09-18A	98.9	28.35	2824	4.7	0.3	Xiao et al., 2015, Acta Petrologica Sinica
TL09-19	98.9	28.35	3021	4.7	0.3	Xiao et al., 2015, Acta Petrologica Sinica
TL09-19	98.9	28.35	3021	4.8	0.3	Xiao et al., 2015, Acta Petrologica Sinica
TL09-20	98.92	28.44	3527	17.4	1	Xiao et al., 2015, Acta Petrologica Sinica
TL09-20	98.92	28.44	3527	18	1.1	Xiao et al., 2015, Acta Petrologica Sinica
TL09-6A	98.01	29.72	4981	18.8	1.1	Xiao et al., 2015, Quarter. Sci.
TL09-6B	98.01	29.72	4981	16.3	1	Xiao et al., 2015, Quarter. Sci.
TL09-8A	98.09	29.72	4724	17.5	1.1	Xiao et al., 2015, Quarter. Sci.
TL09-8B	98.09	29.72	4724	19.6	1.2	Xiao et al., 2015, Quarter. Sci.
TL09-11A	98.15	29.62	4143	19.6	1.2	Xiao et al., 2015, Quarter. Sci.
TL09-11B	98.15	29.62	4143	19.2	1.1	Xiao et al., 2015, Quarter. Sci.
TL09-12A	98.18	29.58	3948	22.8	1.4	Xiao et al., 2015, Quarter. Sci.
TL09-12B	98.18	29.58	3948	22.8	1.4	Xiao et al., 2015, Quarter. Sci.
TL09-14A	98.2	29.56	3741	16.9	1	Xiao et al., 2015, Quarter. Sci.
TL09-14B	98.2	29.56	3741	15.2	0.9	Xiao et al., 2015, Quarter. Sci.
MK09	98.617	29.1103	2543	1.8	0.4	Yang et al., 2016, EPSL
MK12	98.4255	29.7164	3529	6.3	0.3	Yang et al., 2016, EPSL
NJ2	98.8629	26.2995	998	4.4	0.4	Yang et al., 2016, EPSL
NJ4	98.8509	26.9252	1804	5.8	0	Yang et al., 2016, EPSL
NJ9	98.8594	27.1284	1504	3.5	0.1	Yang et al., 2016, EPSL
NJ10	98.8573	27.1287	1418	4	0.4	Yang et al., 2016, EPSL
NJ14	98.835	27.4584	1352	2.5	0.3	Yang et al., 2016, EPSL
NJ18	98.5831	28.0706	1582	3.6	0.5	Yang et al., 2016, EPSL
LCJ3	99.1628	26.716	1771	5.6	0.1	Yang et al., 2016, EPSL
LCJ6	99.3497	26.9793	2131	2.5	0.1	Yang et al., 2016, EPSL
MK01	98.9054	28.4128	2953	5.8	0.5	Yang et al., 2016, EPSL
MK04	98.8592	28.2648	2066	1.3	0.3	Yang et al., 2016, EPSL
MK08	98.9042	28.3916	3030	4.3	0.3	Yang et al., 2016, EPSL
MK13	98.6294	29.7238	4045	81.8	10.5	Yang et al., 2016, EPSL
YAN05	99.7715	26.7777	2143	38.4	0.6	Yang et al., 2016, EPSL
YAN07	99.3474	27.4739	2345	29	1.7	Yang et al., 2016, EPSL
YAN08	99.3472	27.4737	2356	30.8	2	Yang et al., 2016, EPSL
BC-03-05	96.7281	29.6787	4434	52.6	1.7	Zeitler et al., 2014, GSASP
BM-06-05	95.7507	30.3507	4359	10.5	0.3	Zeitler et al., 2014, GSASP
BM-05-05	95.7495	30.3486	4194	8.24	0.48	Zeitler et al., 2014, GSASP
BM-04-05	95.7487	30.3473	4059	7.66	0.24	Zeitler et al., 2014, GSASP
BM-02-05	95.749	30.339	3762	8.53	0.26	Zeitler et al., 2014, GSASP
BM-03-05	95.749	30.339	3922	8.05	0.46	Zeitler et al., 2014, GSASP
BM-07-05	95.7482	30.3335	3498	7.56	0.36	Zeitler et al., 2014, GSASP
NBK-41-23	95.77	30.2408	3207	8.03	0.26	Zeitler et al., 2014, GSASP
BT-36-02	93.1088	29.9731	3457	11.6	0.6	Zeitler et al., 2014, GSASP
BT-07-02	94.8116	29.9542	2485	1.68	0.06	Zeitler et al., 2014, GSASP
BT-23-02	95.3845	29.9541	2600	0.64	0.02	Zeitler et al., 2014, GSASP
NB-60-26	95.3863	29.9449	2634	6.28	0.22	Zeitler et al., 2014, GSASP
BT-25-02	95.3834	29.9246	2952	0.74	0.04	Zeitler et al., 2014, GSASP
NB-61-26	95.4196	29.9243	2653	2.13	0.06	Zeitler et al., 2014, GSASP
NB-59-26	95.6167	29.9059	2731	7.35	0.22	Zeitler et al., 2014, GSASP
NB-63-26	95.4916	29.8915	2637	3.25	0.1	Zeitler et al., 2014, GSASP
BT-22E-02	95.5546	29.8891	2736	0.41	0.02	Zeitler et al., 2014, GSASP
BC-01-05	95.5685	29.8888	2695	1.35	0.04	Zeitler et al., 2014, GSASP
NB-55-26	95.768	29.8539	2774	2.01	0.06	Zeitler et al., 2014, GSASP
BL-02-03	94.4225	29.8111	3995	6.36	0.26	Zeitler et al., 2014, GSASP
BR-01-05	94.4144	29.8108	4527	8.52	0.44	Zeitler et al., 2014, GSASP
NB-58-26	95.8346	29.8102	2852	2.98	0.1	Zeitler et al., 2014, GSASP
NB02-120	94.4212	29.8012	4080	10.1	0.6	Zeitler et al., 2014, GSASP
NB-56-26	95.7678	29.785	2880	6.76	0.18	Zeitler et al., 2014, GSASP
BM-05-02	95.6883	29.7689	4321	5.71	0.16	Zeitler et al., 2014, GSASP
BT-20-01	94.0058	29.7613	3110	18.1	0.8	Zeitler et al., 2014, GSASP
BT-20E-02	94.1842	29.7522	3090	9.07	0.28	Zeitler et al., 2014, GSASP
NB-57-26	96.0384	29.7367	3076	4.55	0.12	Zeitler et al., 2014, GSASP
BR-03-05	94.3962	29.7223	3515	5.63	0.18	Zeitler et al., 2014, GSASP
BS-01-05	96.0199	29.7091	3087	2.8	0.08	Zeitler et al., 2014, GSASP
BL-01-03	94.3887	29.6901	3224	7.12	0.3	Zeitler et al., 2014, GSASP
BR-04-05	94.3813	29.6894	3154	8.78	0.24	Zeitler et al., 2014, GSASP
BT-03-05	94.6013	29.6457	4677	8.45	0.36	Zeitler et al., 2014, GSASP
BT-09-01	94.7106	29.6318	4179	3.95	0.2	Zeitler et al., 2014, GSASP
BT-01-05	94.5952	29.628	4667	7.59	0.32	Zeitler et al., 2014, GSASP
BT-08-02	94.7175	29.6106	3811	8	0.36	Zeitler et al., 2014, GSASP
BT-02-05	94.5755	29.5663	3911	5.62	0.2	Zeitler et al., 2014, GSASP
BT-04-05	94.5654	29.566	3523	5.6	0.24	Zeitler et al., 2014, GSASP
BL-09-03	94.4297	29.5271	2954	8.64	0.36	Zeitler et al., 2014, GSASP
BL-06-03	94.2598	29.5043	3877	6.88	0.38	Zeitler et al., 2014, GSASP
BL-05-03	94.2217	29.5037	4258	7.41	0.34	Zeitler et al., 2014, GSASP
BL-07-03	94.2752	29.5032	3738	6.2	0.26	Zeitler et al., 2014, GSASP
NB-69-26	94.3899	29.4924	3759	7.86	0.24	Zeitler et al., 2014, GSASP
NB-70-26	94.3878	29.4923	3660	8.56	0.24	Zeitler et al., 2014, GSASP
NB-71-26	94.3861	29.4909	3548	6.91	0.18	Zeitler et al., 2014, GSASP
NB-72-26	94.3858	29.4901	3453	7.51	0.22	Zeitler et al., 2014, GSASP
BT-21E-02	94.5649	29.489	2940	4.66	0.22	Zeitler et al., 2014, GSASP
NB-73-26	94.385	29.4883	3368	6.51	0.18	Zeitler et al., 2014, GSASP
NBK-36-23	94.8308	29.4882	2940	1.79	0.06	Zeitler et al., 2014, GSASP
NB-75-26	94.3835	29.4877	3198	7.37	0.24	Zeitler et al., 2014, GSASP
NB-74-26	94.3834	29.4877	3276	6.25	0.18	Zeitler et al., 2014, GSASP
BL-11-03	94.5339	29.4716	2977	5.78	0.18	Zeitler et al., 2014, GSASP
NB-41-26	94.2546	29.3734	3777	6.88	0.24	Zeitler et al., 2014, GSASP
NB-40-26	94.2628	29.3715	3703	5.91	0.18	Zeitler et al., 2014, GSASP
NB-39-26	94.2709	29.3662	3632	5.8	0.18	Zeitler et al., 2014, GSASP
NB-38-26	94.275	29.3652	3607	5.48	0.16	Zeitler et al., 2014, GSASP
NB-37-26	94.283	29.3639	3547	5.41	0.24	Zeitler et al., 2014, GSASP
NB-36-26	94.3073	29.3604	3295	5.77	0.16	Zeitler et al., 2014, GSASP
NB-35-26	94.313	29.3586	3251	6.19	0.26	Zeitler et al., 2014, GSASP
NBK-13-23	94.4147	29.3389	2964	4.22	0.14	Zeitler et al., 2014, GSASP
NB-16-26	94.334	29.325	2974	5.11	0.22	Zeitler et al., 2014, GSASP
NB-22-26	94.4644	29.3102	3016	3.7	0.12	Zeitler et al., 2014, GSASP
NB-26-26	94.4835	29.2963	3274	3.8	0.12	Zeitler et al., 2014, GSASP
NB-19-26	94.2907	29.2233	3100	5.31	0.16	Zeitler et al., 2014, GSASP
NB-05-26	94.1028	29.195	2978	6.94	0.24	Zeitler et al., 2014, GSASP
NB-01-26	94.1837	29.1897	2941	8.11	0.48	Zeitler et al., 2014, GSASP
NB-07-26	94.0546	29.1896	3020	12.5	0.5	Zeitler et al., 2014, GSASP
NB-08-26	93.9445	29.1801	3068	7.16	0.26	Zeitler et al., 2014, GSASP
NB-13-26	94.248	29.1205	3173	5.17	0.32	Zeitler et al., 2014, GSASP
Li21	99.3971	30.4126	3630	7.57	0.7	Zhang et al., 2015, Tectonics
Li23	99.4426	30.4297	3850	3.4	0.3	Zhang et al., 2015, Tectonics
Li24	99.5478	30.5119	4820	5.37	0.5	Zhang et al., 2015, Tectonics
Li26	99.5459	30.5121	4720	3.98	0.4	Zhang et al., 2015, Tectonics
Li28	99.5487	30.5084	4510	3.87	0.4	Zhang et al., 2015, Tectonics
Li29	99.5519	30.5084	4410	3.3	0.3	Zhang et al., 2015, Tectonics
Li30	99.5539	30.5075	4285	3.72	0.4	Zhang et al., 2015, Tectonics
Li31	99.555	30.5069	4200	2.5	0.2	Zhang et al., 2015, Tectonics
CD46	99.9814	30.1811	4260	5.29	0.5	Zhang et al., 2015, Tectonics
CD45	99.9825	30.1846	4387	5.03	0.5	Zhang et al., 2015, Tectonics
MEO12-01	101.376	30.032	4283	59.6	3.8	Zhang et al., 2016, EPSL
MEO12-02	101.396	30.016	4274	72.8	11.1	Zhang et al., 2016, EPSL
MEO12-04	101.569	29.888	3480	37.3	2.6	Zhang et al., 2016, EPSL
MEO12-10	101.424	29.224	3666	7.6	0.7	Zhang et al., 2016, EPSL
MEO12-11	101.42	29.226	3863	7.3	1.7	Zhang et al., 2016, EPSL
MEO12-12	101.417	29.227	4013	7.2	0.7	Zhang et al., 2016, EPSL
MEO12-13	101.415	29.227	4153	14.3	2.9	Zhang et al., 2016, EPSL
MEO12-14	101.412	29.228	4308	6.5	1.1	Zhang et al., 2016, EPSL
MEO12-15	101.412	29.218	4445	7.9	0.2	Zhang et al., 2016, EPSL
MEO12-16	101.408	29.217	4602	9.2	0.5	Zhang et al., 2016, EPSL
MEO12-17	101.408	29.214	4800	9.6	0.7	Zhang et al., 2016, EPSL

## Sheet: AFT
Dataset S5B. A collection of available apatite fission track data around the eastern Himalaya syntaxis.
Sample NO	Longitude	Latitude	Elevation (m)	Age (Ma)	Error	Reference
CD282	97.9599	29.7323	4703	26	3	This study
CD280	98.0137	29.7181	4991	24	5	This study
CD279	98.0459	29.7234	4822	18	4	This study
CD277	98.1301	29.6626	4436	24	2	This study
CD276	98.1401	29.6327	4197	15	2	This study
CD275	98.1663	29.5995	4020	16	3	This study
CD274	98.1814	29.5791	3894	21	2	This study
CD273	98.1936	29.5608	3757	22	3	This study
CD272	98.2099	29.5531	3622	21	3	This study
CD260	98.5356	29.6949	4325	76	13	This study
CD252	99.2993	27.3477	2878	118	12	This study
CD253	99.3463	27.3608	2703	95	8	This study
CD254	99.3479	27.4155	2509	61	9	This study
FT-01	103.7	28.9175	610	20.2	3.7	An et al., 2008, Science in China
FT-02	103.704	28.9395	498	8.5	1.5	An et al., 2008, Science in China
FT-05	103.727	28.9546	437	23.5	2.9	An et al., 2008, Science in China
FT-07	103.443	28.1951	914	20.7	3.3	An et al., 2008, Science in China
FT-09	103.447	28.1984	653	11	3.2	An et al., 2008, Science in China
FT-10	103.826	28.4578	379	10.4	4.2	An et al., 2008, Science in China
FT-11	103.823	28.4551	455	15.8	2.6	An et al., 2008, Science in China
FT-12	103.823	28.4501	510	30.7	3.5	An et al., 2008, Science in China
FT-13	103.843	28.2328	517	22.3	3.3	An et al., 2008, Science in China
FT-15	103.859	28.2576	504	27.2	6.7	An et al., 2008, Science in China
FT93-139	104.68	31.78	600	162	23	Arne et al., 1997, Tectonophysics
FT93-140	104.72	31.68	600	189	20	Arne et al., 1997, Tectonophysics
FT93-143	104.78	32.27	750	33	8	Arne et al., 1997, Tectonophysics
FT93-144	104.44	32.74	1450	72	7	Arne et al., 1997, Tectonophysics
FT93-145	104.54	32.4	1200	73	14	Arne et al., 1997, Tectonophysics
FT93-149	103.61	32.82	3150	57	12	Arne et al., 1997, Tectonophysics
FT93-150	103.58	32.86	3050	38	11	Arne et al., 1997, Tectonophysics
FT93-151	103.94	32.74	4050	122	12	Arne et al., 1997, Tectonophysics
FT-1	103.19	31.76	3950	6.6	2	Arne et al., 1997, Tectonophysics
FT-2	103.19	31.76	3500	7.3	2.8	Arne et al., 1997, Tectonophysics
FT-4	103.19	31.76	2750	3.9	1.2	Arne et al., 1997, Tectonophysics
FT-5	103.12	31.66	2400	3.8	2.6	Arne et al., 1997, Tectonophysics
FT-7	103.42	31.06	950	6.5	2.4	Arne et al., 1997, Tectonophysics
CW-6a	103.42	31.06	1150	4.8	3	Arne et al., 1997, Tectonophysics
CW-3	103.64	31.03	800	173	17	Arne et al., 1997, Tectonophysics
CW-14	104.02	31.13	800	140	24	Arne et al., 1997, Tectonophysics
FT93-152	103.46	30.9	800	39	10	Arne et al., 1997, Tectonophysics
FT93-154	103.65	30.98	900	168	20	Arne et al., 1997, Tectonophysics
CW-31	103.05	30.33	1200	108	23	Arne et al., 1997, Tectonophysics
CW-33	102.95	30.38	800	93	28	Arne et al., 1997, Tectonophysics
CW-51	103.03	30.36		105	17	Arne et al., 1997, Tectonophysics
CW-52	103.39	30.2	1100	14	3	Arne et al., 1997, Tectonophysics
CW-39b	102.72	30.4		4.3	1.4	Arne et al., 1997, Tectonophysics
CW-36	102.86	30.46	1250	8.9	8	Arne et al., 1997, Tectonophysics
CW-40	102.72	30.4		11	7	Arne et al., 1997, Tectonophysics
NB10	94.903	29.491	4100	1.1	0.4	Burg et al., 1998, JAES
NB12	94.89	29.504	3400	0.9	0.8	Burg et al., 1998, JAES
NB64	94.884	29.525	2900	1.1	0.6	Burg et al., 1998, JAES
NB6	94.444	29.592	2020	0.5	0.4	Burg et al., 1998, JAES
NB9	95.049	30.072	3000	8.2	1.6	Burg et al., 1998, JAES
CD144	99.5151	27.0599	2595	35.8	2.8	Cao et al., 2020, GSA Bulletin
CD146	99.4895	27.0908	2710	45.3	3.7	Cao et al., 2020, GSA Bulletin
CD147	99.4851	27.1013	2789	41.3	3.4	Cao et al., 2020, GSA Bulletin
CD148	99.4927	27.1031	2939	38.7	3.2	Cao et al., 2020, GSA Bulletin
CD149	99.4999	27.0996	2985	44	3.5	Cao et al., 2020, GSA Bulletin
JC22	99.7043	26.6302	4045	37.4	4.1	Cao et al.,2019, Tectonics
JC23	99.7128	26.632	3953	31.4	3.1	Cao et al.,2019, Tectonics
JC24	99.7302	26.6433	3832	32.3	3.3	Cao et al., 2019, Tectonics
JC25	99.7454	26.6479	3672	42.2	12.1	Cao et al., 2019, Tectonics
JC26	99.7683	26.6451	3491	33.1	3.4	Cao et al., 2019, Tectonics
JC27	99.7807	26.6607	3317	28.5	4.1	Cao et al., 2019, Tectonics
JC28	99.8009	26.6595	3058	27	5	Cao et al., 2019, Tectonics
JC29	99.815	26.6561	2848	20.3	2.4	Cao et al., 2019, Tectonics
JC30	99.7718	26.7779	2130	21.3	4.4	Cao et al., 2019, Tectonics
JC31	99.8125	26.8224	2724	19.5	4.4	Cao et al., 2019, Tectonics
JC33	99.8153	26.7891	2019	18	5.3	Cao et al., 2019, Tectonics
CD114	99.9087	26.5874	2531	28.8	4.6	Cao et al., 2019, Tectonics
CD115	99.91	26.5877	2460	34.9	4.6	Cao et al., 2019, Tectonics
CD117	99.9115	26.5887	2342	26.2	3.6	Cao et al., 2019, Tectonics
CD118	99.9132	26.5891	2276	21	3.2	Cao et al., 2019, Tectonics
CD193	99.9069	26.5844	2610	32.5	3.4	Cao et al., 2019, Tectonics
8KR67DZ*	80.9162	31.1985	5016	7.1	0.3	Carrapa et al., 2014, Geology
5KR147*#	80.9408	31.2858	5180	18.8	2.6	Carrapa et al., 2014, Geology
5KR247#	80.9408	31.2858		18.7	2.5	Carrapa et al., 2014, Geology
5KR380	80.9408	31.2858		18.4	2.5	Carrapa et al., 2014, Geology
4KR408*	81.0147	31.1934	5773	17.4	3	Carrapa et al., 2014, Geology
1KR353DZ1	81.0294	31.1955	5331	16.4	2.9	Carrapa et al., 2014, Geology
2KR107DZ	81.1181	31.1867	5507	17	4.5	Carrapa et al., 2014, Geology
5YA434	81.8998	30.788		14.1	3.1	Carrapa et al., 2014, Geology
1LK260#*	84.861	29.9066	5988	17.1	2.9	Carrapa et al., 2014, Geology
1LK194dz	84.861	29.9066		16.1	2.5	Carrapa et al., 2014, Geology
GY1-0	86.5411	29.5258	4700	17	3.3	Carrapa et al., 2014, Geology
GY1-middle member	86.5422	29.5277	4923	14.4	2.8	Carrapa et al., 2014, Geology
6-4-05-1	81.9998	30.8231	5574	11.4	1.4	Carrapa et al., 2014, Geology
Coal mine granite	80.9785	31.2737	5735	13.3	3.7	Carrapa et al., 2014, Geology
GU-gr1-12	82.0014	30.8237	5100	15.4	1.7	Carrapa et al., 2014, Geology
LK6005	84.8693	29.9111	6005	13.8	0.6	Carrapa et al., 2014, Geology
VP2#	84.8765	29.9216	5935	14.2	1.3	Carrapa et al., 2014, Geology
TM-33	94.3422	29.2576		1.6	0.4	Chen et al., 1999, Science in China
TL-24	93.8333	29.1667		1.2	0.3	Chen et al., 1999, Science in China
TL-19	93.5	29.1667		2.7	0.1	Chen et al., 1999, Science in China
TG-39	93.2444	29.9698		1.4	0.4	Chen et al., 1999, Science in China
TB-37	94.3333	29.5		2.3	0.5	Chen et al., 1999, Science in China
TS-26	92.3333	29.5		14	2	Chen et al., 1999, Science in China
TG-41	92.1489	29.755		5	1.7	Chen et al., 1999, Science in China
TS-27	92.3333	29.5		12.6	1.4	Chen et al., 1999, Science in China
TM-33	94.3422	29.2576		1.6	0.4	Chen et al., 1999, Science in China
TL-24	93.8333	29.1667		1.2	0.3	Chen et al., 1999, Science in China
TL-19	93.5	29.1667		2.7	0.1	Chen et al., 1999, Science in China
TG-39	93.2444	29.9698		1.4	0.4	Chen et al., 1999, Science in China
TB-37	94.3333	29.5		2.3	0.5	Chen et al., 1999, Science in China
TS-26	92.3333	29.5		14	2	Chen et al., 1999, Science in China
TG-41	92.1489	29.755		5	1.7	Chen et al., 1999, Science in China
TS-27	92.3333	29.5		12.6	1.4	Chen et al., 1999, Science in China
MC-01-11	101.93	31.198	2840	8.43	0.87	Clark et al., 2005, Geology
MC-01-12	101.926	31.1951	2580	10	0.7	Clark et al., 2005, Geology
MC-01-13	101.924	31.1937	2500	10.4	0.7	Clark et al., 2005, Geology
MC-01-14	101.929	31.2042	3000	10.5	1.1	Clark et al., 2005, Geology
MC-01-15	101.932	31.1733	2100	8.87	0.49	Clark et al., 2005, Geology
MC-01-25	101.751	28.5425	1700	5.63	0.99	Clark et al., 2005, Geology
MC-01-26	101.748	28.5342	1620	6.38	1.11	Clark et al., 2005, Geology
MC-01-27	101.734	28.552	1950	4.73	1.32	Clark et al., 2005, Geology
M370	90.95	29.49	4350	16.2	1.2	Copeland et al., 1995, Tectonics
H-88-1	90.47	29.35	3800	18.6	1.5	Copeland et al., 1995, Tectonics
K-88-33(A)	90.73	29.88	3870	45.2	5.9	Copeland et al., 1995, Tectonics
K-88-33(B)	90.73	29.88	3870	47	5.5	Copeland et al., 1995, Tectonics
K-88-66	91.3	29.56	5050	33.3	5.2	Copeland et al., 1995, Tectonics
K-88-73	90.74	29.3	3440	20.2	1.6	Copeland et al., 1995, Tectonics
PC-88-29	90.57	30.09	4300	9.5	0.9	Copeland et al., 1995, Tectonics
PC-88-32	90.91	29.42	4560	18.1	1.7	Copeland et al., 1995, Tectonics
PC-88-39(A)	90.93	29.69	3750	19.9	1.8	Copeland et al., 1995, Tectonics
PC-88-39(B)	90.93	29.69	3750	20.1	1.7	Copeland et al., 1995, Tectonics
PC-88-59	91.12	29.27	3700	6.9	0.9	Copeland et al., 1995, Tectonics
PC-88-65	91.47	29.31	3750	24.9	2.3	Copeland et al., 1995, Tectonics
SQM-05	103.894	29.008	360	86	6	Deng et al., 2018, Basin Res.
SQM-07	103.882	28.9032	476	42	3	Deng et al., 2018, Basin Res.
SQM-08	103.878	28.8934	494	29	2	Deng et al., 2018, Basin Res.
SQM-10	103.896	28.8973	583	25	2	Deng et al., 2018, Basin Res.
SS-22	102.726	28.9639	1064	26	2	Deng et al., 2018, Basin Res.
SS-23	102.719	28.9501	1323	30	2	Deng et al., 2018, Basin Res.
SS-25	102.713	28.9452	1360	16	2	Deng et al., 2018, Basin Res.
SS-26	102.715	28.9301	1376	16	2	Deng et al., 2018, Basin Res.
SS-29	102.594	28.8371	1477	17	2	Deng et al., 2018, Basin Res.
SYX-01	102.477	28.2646	1909	14	2	Deng et al., 2018, Basin Res.
SYX-02	102.487	28.2624	1914	17	2	Deng et al., 2018, Basin Res.
SYX-03	102.503	28.2648	1952	22	2	Deng et al., 2018, Basin Res.
SYX-06	102.535	28.2164	2032	21	2	Deng et al., 2018, Basin Res.
MG-02	96.5939	28.9358	1900	3.22	0.72	Ding et al., 1995, Chinese Sci. Bull.
SM-04	97.0785	28.3904	1350	1.3	0.24	Ding et al., 1995, Chinese Sci. Bull.
BA-02	96.813	28.7557	1700	3.31	0.82	Ding et al., 1995, Chinese Sci. Bull.
SM-01	97.0703	28.4494	1700	2.56	0.38	Ding et al., 1995, Chinese Sci. Bull.
CY-01	97.0875	28.6974	1500	0.54	0.38	Ding et al., 1995, Chinese Sci. Bull.
CY-08	97.3209	28.7247	2280	1.25	0.63	Ding et al., 1995, Chinese Sci. Bull.
DML-02	96.9222	29.5697	4490	11.2	0.67	Ding et al., 1995, Chinese Sci. Bull.
DML-03	96.9604	29.5321	4200	10.13	0.78	Ding et al., 1995, Chinese Sci. Bull.
DML-04	97.0015	29.4915	3950	8.33	1.34	Ding et al., 1995, Chinese Sci. Bull.
DML-05	97.166	29.4096	3510	0.93	0.19	Ding et al., 1995, Chinese Sci. Bull.
DML-01	96.8893	29.6081	5300	25.22	1.36	Ding et al., 1995, Chinese Sci. Bull.
ZXZ-01	96.62	30.028	3700	3.02	0.36	Ding et al., 1995, Chinese Sci. Bull.
BM-09	95.9103	29.8974	3200	3.13	0.3	Ding et al., 1995, Chinese Sci. Bull.
BM-07	95.6776	29.9978	2700	0.97	0.2	Ding et al., 1995, Chinese Sci. Bull.
BM-05	95.5295	30.0192	1900	0.31	0.09	Ding et al., 1995, Chinese Sci. Bull.
CY-10	97.4615	28.9387	2520	2.15	0.89	Ding et al., 1995, Chinese Sci. Bull.
CY-07	97.1646	28.6	1840	3.82	0.62	Ding et al., 1995, Chinese Sci. Bull.
DC-26B	90.8914	31.3668	4812	72.8	3.2	Haider et al., 2013, JAES
DC-28	90.172	31.3746	4680	58.8	2.9	Haider et al., 2013, JAES
DC-40	90.8623	30.9579	4955	71.7	4	Haider et al., 2013, JAES
DC-41	90.9395	30.9366	4845	88.5	5.5	Haider et al., 2013, JAES
H-7	90.082	31.2753	5350	61.7	4.4	Haider et al., 2013, JAES
H-12	90.1504	31.3281	4750	54.6	2.4	Haider et al., 2013, JAES
H-16	89.9504	31.4844	4700	52.2	2.1	Haider et al., 2013, JAES
H-33	90.151	31.2879	5020	60.1	3.3	Haider et al., 2013, JAES
H-34	90.1428	31.2944	5001	66.9	3.6	Haider et al., 2013, JAES
H-45	90.6566	31.151	4700	57.3	2.8	Haider et al., 2013, JAES
H-49	90.7381	31.0037	4876	45	3.6	Haider et al., 2013, JAES
H-70	90.5591	31.0527	4841	58.2	3.2	Haider et al., 2013, JAES
H-71B	90.5139	31.1702	4693	72	4.3	Haider et al., 2013, JAES
H-72	90.5319	31.143	4603	57.5	4.2	Haider et al., 2013, JAES
H-85	90.3332	31.297	4640	61.3	3	Haider et al., 2013, JAES
H-86	90.3545	31.2613	4664	53.3	3.4	Haider et al., 2013, JAES
H-90	90.6772	31.1817	4770	61	3.7	Haider et al., 2013, JAES
H-105	90.1044	31.2885	5333	45.8	2.4	Haider et al., 2013, JAES
H-19	89.7781	31.2078	4830	65	4.2	Haider et al., 2013, JAES
H-20	89.7804	31.2208	5070	68.4	4.3	Haider et al., 2013, JAES
H-21	89.7747	31.2419	5180	76.6	4.9	Haider et al., 2013, JAES
H-4	91.222	30.878	5050	64.1	3.9	Haider et al., 2013, JAES
H-23	89.8048	31.4227	4630	59.4	2.3	Hetzel et al., 2011, Geology
H-24	89.8054	31.4434	4610	58.5	3.3	Hetzel et al., 2011, Geology
H-29	89.8982	31.4433	4970	56.8	2.8	Hetzel et al., 2011, Geology
H-30	89.8959	31.4685	4750	58.2	3	Hetzel et al., 2011, Geology
H-31	89.9194	31.4797	4770	68.4	3.9	Hetzel et al., 2011, Geology
DC-31	89.9208	31.4677	4824	58.8	3	Hetzel et al., 2011, Geology
DC-33	90.0143	31.3733	4733	59.6	2.4	Hetzel et al., 2011, Geology
SG02	101.41	31.07	3384	26.1	1.45	Jolivet et al., 2015, JAES
SG03	101.4	31.08	3348	16.3	1.75	Jolivet et al., 2015, JAES
SG04	101.42	31.08	3348	10.9	0.85	Jolivet et al., 2015, JAES
SG05	101.43	31.07	3350	11.4	0.75	Jolivet et al., 2015, JAES
SG06	101.44	31.07	3300	12.8	1.3	Jolivet et al., 2015, JAES
SG07	101.47	31.08	3147	8.1	0.4	Jolivet et al., 2015, JAES
SG08	101.52	31.1	2867	5.7	0.4	Jolivet et al., 2015, JAES
SG09	101.54	31.07	2762	5.7	0.35	Jolivet et al., 2015, JAES
SG10	101.58	31.04	2657	4.5	0.3	Jolivet et al., 2015, JAES
SG12	101.69	30.99	2395	5.2	0.5	Jolivet et al., 2015, JAES
SG15	101.74	30.79	2211	26	4.9	Jolivet et al., 2015, JAES
SG17	101.82	30.85	1982	8.6	1	Jolivet et al., 2015, JAES
SG18	101.94	30.82	1860	32.7	5.9	Jolivet et al., 2015, JAES
SG19	101.95	30.79	1853	4.7	0.35	Jolivet et al., 2015, JAES
SG20	102.03	30.74	1800	145.3	20.6	Jolivet et al., 2015, JAES
2003T150	100.086	29.2555	4272	154.9	10.6	Lai et al., 2007, Science in China
2003T145	100.283	29.5322	4488	114.1	7.5	Lai et al., 2007, Science in China
2003T135	99.9462	30.2032	4227	10.5	1.1	Lai et al., 2007, Science in China
2003T134	99.948	30.2043	4314	14	1.4	Lai et al., 2007, Science in China
2003T144	100.27	29.5432	4477	115.6	4	Lai et al., 2007, Science in China
2003T133	99.9488	30.2065	4411	15.5	1.7	Lai et al., 2007, Science in China
2003T130	99.9508	30.2082	4564	21	2	Lai et al., 2007, Science in China
2003T132	99.9498	30.2077	4493	15.2	1.5	Lai et al., 2007, Science in China
2003T131	99.9507	30.208	4542	16.5	1.6	Lai et al., 2007, Science in China
2003T129	99.9517	30.2087	4607	23.2	2.3	Lai et al., 2007, Science in China
2003T128	99.9532	30.2088	4750	23.9	2.1	Lai et al., 2007, Science in China
2003T143	100.332	29.6155	4122	115.4	7.6	Lai et al., 2007, Science in China
2003T142	100.345	29.6318	3966	104.1	7.1	Lai et al., 2007, Science in China
2003T141	100.352	29.6433	3845	81.6	5.8	Lai et al., 2007, Science in China
2003T79	99.7857	31.1772	4280	124.3	8.6	Lai et al., 2007, Science in China
2003T75	99.7587	31.2075	4402	151.7	10.4	Lai et al., 2007, Science in China
2003T76	99.8457	31.2222	4477	150.2	10.2	Lai et al., 2007, Science in China
2003T77	99.8718	31.264	4567	153.7	10.2	Lai et al., 2007, Science in China
2003T26	101.579	30.5432	3928	6.4	0.9	Lai et al., 2007, Science in China
2003T40	98.9617	31.9148	4891	25.2	2.1	Lai et al., 2007, Science in China
2003T39	98.9378	31.9363	4756	22.9	2	Lai et al., 2007, Science in China
2003T38	98.9325	31.9445	4690	16.9	1.6	Lai et al., 2007, Science in China
2003T37	98.9373	31.9255	4560	16.8	2	Lai et al., 2007, Science in China
2003T36	98.9242	31.9402	4410	15	1.4	Lai et al., 2007, Science in China
2003T227	101.804	30.0745	4300	11.8	1.4	Lai et al., 2007, Science in China
2003T229	101.844	30.0355	3717	9.8	1.1	Lai et al., 2007, Science in China
2003T230	101.885	29.9945	3252	10.6	1.2	Lai et al., 2007, Science in China
2003T231	101.926	29.9865	2994	8.1	0.9	Lai et al., 2007, Science in China
2003T232	101.938	29.991	2999	8.5	1.3	Lai et al., 2007, Science in China
2003T207	101.778	28.5627	1490	12.8	1.3	Lai et al., 2007, Science in China
2003T208	101.75	28.3683	1489	14.9	1.6	Lai et al., 2007, Science in China
2003T212	101.644	28.643	1998	13.2	1.8	Lai et al., 2007, Science in China
2003T213	101.569	28.8745	2596	16	2	Lai et al., 2007, Science in China
CY-3	97.1092	28.5822	1630	3.44	0.52	Lei et al., 2006, Acta Petrologica Sinica
DLJ-1	98.4492	27.7767	3326	6.8	0.5	Lei et al., 2006, Acta Petrologica Sinica
DLJ-5	98.4544	27.8006	3193	6.3	0.9	Lei et al., 2006, Acta Petrologica Sinica
DLJ-7	98.4511	27.8317	3008	6.4	0.8	Lei et al., 2006, Acta Petrologica Sinica
DLJ-9	98.4533	27.8489	2777	6.4	1.1	Lei et al., 2006, Acta Petrologica Sinica
DLJ-11	98.4206	27.8783	2442	5	1	Lei et al., 2006, Acta Petrologica Sinica
DLJ-13	98.4047	27.9064	2158	5.5	1.1	Lei et al., 2006, Acta Petrologica Sinica
DLJ-14	98.3847	27.8964	2049	4.9	0.6	Lei et al., 2006, Acta Petrologica Sinica
DLJ-21	98.35	27.9039	1821	4.8	0.8	Lei et al., 2006, Acta Petrologica Sinica
DLJ-19	98.3556	27.8992	1587	4	1	Lei et al., 2006, Acta Petrologica Sinica
CY-4	97.1631	28.5914	1780	4.13	0.69	Lei et al., 2008, Acta Petrologica Sinica
CY-5	97.295	28.6094	2019	5.09	0.82	Lei et al., 2008, Acta Petrologica Sinica
CY-12	97.0342	29.3225	4768	16	0.8	Lei et al., 2008, Acta Petrologica Sinica
CY-6	97.4217	28.6328	2241	3.61	0.58	Lei et al., 2008, Acta Petrologica Sinica
CY-9	97.3933	29.0083	2842	4.4	1.14	Lei et al., 2008, Acta Petrologica Sinica
CY-10	97.1339	29.3258	3877	11	0.8	Lei et al., 2008, Acta Petrologica Sinica
CY-7	97.47	29.7594	2453	3.68	0.5	Lei et al., 2008, Acta Petrologica Sinica
CY-11	97.0533	29.485	4500	12.2	0.7	Lei et al., 2008, Acta Petrologica Sinica
NML-1	94.9428	29.5875	3393	1.58	0.28	Lei et al., 2008, Quarter. Sci.
NML-3	94.9594	29.5856	3660	0.97	0.11	Lei et al., 2008, Quarter. Sci.
NML-4	94.9569	29.5831	3740	1.27	0.26	Lei et al., 2008, Quarter. Sci.
NML-5	94.9589	29.5731	3958	0.64	0.09	Lei et al., 2008, Quarter. Sci.
NML-6	94.9689	29.5539	4373	1.1	0.24	Lei et al., 2008, Quarter. Sci.
NML-7	94.9731	29.5442	4295	1.22	0.26	Lei et al., 2008, Quarter. Sci.
NML-8-1	94.9603	29.5439	4291	0.65	0.08	Lei et al., 2008, Quarter. Sci.
NML-8-5	94.9603	29.5439	4291	0.67	0.1	Lei et al., 2008, Quarter. Sci.
NML-9	94.9569	29.5483	4295	0.74	0.13	Lei et al., 2008, Quarter. Sci.
NML-11	94.9464	29.55	4537	0.74	0.13	Lei et al., 2008, Quarter. Sci.
QJ-03-1	105.27	32.42	1274	36	3	Li et al., 2012, JAES
QJ-06-1	105.27	32.39	1149	32	4	Li et al., 2012, JAES
QJ-14-1	105.29	32.35	715	43	4	Li et al., 2012, JAES
QJ-44-1	105.3	32.25	586	43	5	Li et al., 2012, JAES
QJ-56-1	105.31	32.1	769	76	5	Li et al., 2012, JAES
SNS46-1	105.65	32.35	491	91	6	Li et al., 2012, JAES
GN-02	105.85	32.45	517	80	6	Li et al., 2012, JAES
GN-06	105.85	32.4	491	85	7	Li et al., 2012, JAES
GN-07	106.02	31.43	421	109	10	Li et al., 2012, JAES
GN-09	105.88	31	349	92	8	Li et al., 2012, JAES
A1-059	104.19	31.67	1165	239	11	Li et al., 2012, JAES
A2-060	104.23	31.63	926	18	3	Li et al., 2012, JAES
A3-061	104.38	31.6	597	108	10	Li et al., 2012, JAES
B2-063	102.79	30.4	1088	3.9	0.4	Li et al., 2012, JAES
B4-065	102.8	30.32	924	26	3	Li et al., 2012, JAES
B5-066	102.82	30.22	796	43	3	Li et al., 2012, JAES
B6-067	102.96	29.95	620	9.1	0.8	Li et al., 2012, JAES
Sss29	102.66	30.06	888	21	3	Li et al., 2012, JAES
Sss32	102.47	29.95	1251	8.9	0.9	Li et al., 2012, JAES
T12-51	92.3	29.198	5216	10.7	1.5	Li et al., 2015, Tectonophysics
T12-52	92.298	29.198	5252	10.4	0.8	Li et al., 2015, Tectonophysics
T12-54	92.299	29.195	5300	15.7	2	Li et al., 2015, Tectonophysics
T12-44	91.712	29.124	3642	14.7	2.1	Li et al., 2015, Tectonophysics
T12-45	91.659	28.964	3922	21.5	2.3	Li et al., 2015, Tectonophysics
T12-46	91.691	29.05	3975	14.1	1.1	Li et al., 2015, Tectonophysics
T12-47	91.618	28.909	4156	20.5	2.4	Li et al., 2015, Tectonophysics
T12-48	91.632	28.879	4368	18.4	1.3	Li et al., 2015, Tectonophysics
T12-49	91.646	28.836	4592	20.3	1.5	Li et al., 2015, Tectonophysics
T12-97	91.878	29.016	3841	15.4	1.8	Li et al., 2015, Tectonophysics
T12-98	91.871	29.066	3774	14.4	1.5	Li et al., 2015, Tectonophysics
T12-100	91.82	29.125	3668	14.2	2.1	Li et al., 2015, Tectonophysics
T12-101	91.108	29.1	3897	22.3	2.5	Li et al., 2015, Tectonophysics
T12-103	91.111	29.127	3827	19.6	1	Li et al., 2015, Tectonophysics
T12-91	91.994	28.833	5260	10.9	0.8	Li et al., 2015, Tectonophysics
T12-93	91.953	28.888	4257	11.7	1.2	Li et al., 2015, Tectonophysics
T12-96	91.92	28.936	3972	10	1.2	Li et al., 2015, Tectonophysics
T12-28	91.32	29.822	5003	22.5	1.8	Li et al., 2016, G-cube
T12-33	92.188	30.098	4302	33.5	2.5	Li et al., 2016, G-cube
T12-35	92.052	30.022	4062	26.3	2	Li et al., 2016, G-cube
T12-36	92.025	29.981	4982	39.7	2.2	Li et al., 2016, G-cube
T12-37	92.022	29.983	4670	41.4	2.2	Li et al., 2016, G-cube
T12-40	92.01	30.003	4003	39.7	2.5	Li et al., 2016, G-cube
T12-42	91.91	29.981	3890	24.6	1.4	Li et al., 2016, G-cube
T13-15-2	91.336	29.698	3730	45.8	3.9	Li et al., 2016, G-cube
T13-15-3	91.267	29.683	4013	46	4.8	Li et al., 2016, G-cube
L-79-08	91.1545	29.7349	4005	27.2	2.9	Liu and Zhang,1987, Science in China
L-79-09	91.1631	29.7299	3970	27.1	2.9	Liu and Zhang,1987, Science in China
L-79-11	91.1647	29.7055	3700	25.9	2.5	Liu and Zhang,1987, Science in China
L-79-12	91.1098	29.6882	3600	25.5	2.3	Liu and Zhang,1987, Science in China
K-79-12	89.6795	28.5805	4450	11.5	1.6	Liu and Zhang,1987, Science in China
K-79-13	89.6851	28.5924	4380	10.7	1.4	Liu and Zhang,1987, Science in China
K-79-16	89.6801	28.6028	4090	11.3	1.3	Liu and Zhang,1987, Science in China
DQ11-01	98.9616	28.3796	4974	56.6	2.8	Liu-Zeng et al., 2018, EPSL
DQ11-03	98.9687	28.3728	4704	39.3	2.2	Liu-Zeng et al., 2018, EPSL
DQ11-11	98.9263	28.3753	4248	43.8	2.6	Liu-Zeng et al., 2018, EPSL
DQ11-13	98.9176	28.3762	3960	43.8	2.1	Liu-Zeng et al., 2018, EPSL
DQ11-15	98.9091	28.3797	3660	39.4	2.1	Liu-Zeng et al., 2018, EPSL
TL09-20	98.9224	28.4423	3527	42	2.8	Liu-Zeng et al., 2018, EPSL
DQ11-17	98.8995	28.3814	3360	28.6	1.5	Liu-Zeng et al., 2018, EPSL
TL09-19	98.9051	28.3903	3026	21	1.2	Liu-Zeng et al., 2018, EPSL
TL09-18	98.9025	28.3482	2824	15.3	1.1	Liu-Zeng et al., 2018, EPSL
WX11-03	99.3031	27.4307	3150	115.7	5	Liu-Zeng et al., 2018, EPSL
TL09-31	99.2723	27.3716	3140	88.3	6.5	Liu-Zeng et al., 2018, EPSL
TL09-30	99.2892	27.3476	2919	58.1	8.3	Liu-Zeng et al., 2018, EPSL
WX11-07	99.3052	27.4351	2848	102	5.3	Liu-Zeng et al., 2018, EPSL
WX11-08	99.308	27.4478	2620	72.7	3.3	Liu-Zeng et al., 2018, EPSL
TL09-28	99.3473	27.4264	2476	88.6	5	Liu-Zeng et al., 2018, EPSL
WX11-10	99.3327	27.4629	2439	53.2	2.4	Liu-Zeng et al., 2018, EPSL
TL09-27	99.3504	27.479	2298	58.2	5.4	Liu-Zeng et al., 2018, EPSL
KW01	98.8773	28.442	3463	36.3	17.2	Replumaz et al., 2020, Tectonics
KW04	98.8106	28.5049	2562	24.3	11.4	Replumaz et al., 2020, Tectonics
KW05b	98.8182	28.4805	2350	14.8	9.5	Replumaz et al., 2020, Tectonics
KW34	98.8688	28.3556	2115	33.7	17.9	Replumaz et al., 2020, Tectonics
KW40	98.766	28.2013	2911	6.1	2.5	Replumaz et al., 2020, Tectonics
KW41	98.7776	28.2063	2694	5.6	1	Replumaz et al., 2020, Tectonics
KW42	98.7888	28.2022	2573	3	0.8	Replumaz et al., 2020, Tectonics
KW43	98.7932	28.2033	2429	3.2	1.2	Replumaz et al., 2020, Tectonics
YA05	100.19	29.46	4677	88.7	7.3	Reid et al., 2005, JAES
YA03	100.28	29.53	4490	85.5	10.9	Reid et al., 2005, JAES
YA02	100.32	29.6	4160	82.3	16	Reid et al., 2005, JAES
YA04	100.28	29.53	4640	72.3	7	Reid et al., 2005, JAES
456b	99.07	29.1	2610	9.9	1.1	Reid et al., 2005, JAES
457	99.06	29.39	2615	5.9	0.8	Reid et al., 2005, JAES
460	99.06	29.37	2630	8.1	1.2	Reid et al., 2005, JAES
YA13	98.94	28.44	3320	42	4	Reid et al., 2005, JAES
YA32	99.44	30.26	3900	16.8	1.8	Reid et al., 2005, JAES
JV1	89.88	31.34	5110	61.7	2.9	Rohemann et al., 2012, Geology
JV4	89.89	31.36	5230	53.7	2.6	Rohemann et al., 2012, Geology
PK1A	91.7	31.88	4706	72.9	3	Rohemann et al., 2012, Geology
PK1B	91.7	31.87	4706	72.7	4.4	Rohemann et al., 2012, Geology
PK2	91.71	32.03	4809	74.4	3	Rohemann et al., 2012, Geology
PK3A	91.71	32.12	4563	71.9	3.1	Rohemann et al., 2012, Geology
PU1	92.01	30.07	4533	53.6	2.1	Rohemann et al., 2012, Geology
	95.406	29.571	1025	1.4	0.4	Seward and Burg, 2008, Tectonophysics
	95.116	29.872	1850	0.7	0.35	Seward and Burg, 2008, Tectonophysics
	95.047	30.073	2020	0.5	0.1	Seward and Burg, 2008, Tectonophysics
	95.234	30.045	2450	0.4	0.1	Seward and Burg, 2008, Tectonophysics
	95.418	29.674	2480	0.8	0.1	Seward and Burg, 2008, Tectonophysics
	95.402	29.945	2670	1.2	0.25	Seward and Burg, 2008, Tectonophysics
	95.664	29.911	2740	4.3	0.5	Seward and Burg, 2008, Tectonophysics
	94.902	29.542	2900	1.1	0.3	Seward and Burg, 2008, Tectonophysics
	94.618	29.487	3000	7.8	0.7	Seward and Burg, 2008, Tectonophysics
	94.811	29.922	3330	3.2	0.3	Seward and Burg, 2008, Tectonophysics
	94.95	29.486	3400	0.9	0.4	Seward and Burg, 2008, Tectonophysics
	94.976	29.485	4100	1.1	0.2	Seward and Burg, 2008, Tectonophysics
	95.732	29.857	4100	4.8	0.9	Seward and Burg, 2008, Tectonophysics
09T01-1	90.7149	31.2867	4667	48.9	4.9	Shen T.Y., PhD thesis, 2016
09T02-1	89.9289	31.4881	4700	52	2.8	Shen T.Y., PhD thesis, 2016
09T03-1	89.8399	31.4825	4741	52.8	2.8	Shen T.Y., PhD thesis, 2016
09T07-1	89.1557	32.0326	4564	58.2	4.4	Shen T.Y., PhD thesis, 2016
09T17-1	89.1018	32.3163	4765	59.4	7.3	Shen T.Y., PhD thesis, 2016
09T20-1	90.0541	32.4165	4732	52	3.2	Shen T.Y., PhD thesis, 2016
13T01	81.5839	31.0803	5447	16.3	1	Shen T.Y., PhD thesis, 2016
13T02	81.5816	31.0792	5317.5	13.7	0.9	Shen T.Y., PhD thesis, 2016
13T04	81.5382	31.0456	5044	12	1.3	Shen T.Y., PhD thesis, 2016
14T01	82.0507	30.8348	5492.5	14.9	1.2	Shen T.Y., PhD thesis, 2016
14T03	82.0281	30.8305	5291.6	12.9	1.5	Shen T.Y., PhD thesis, 2016
14T05	82.0014	30.8239	5103.5	11.4	1	Shen T.Y., PhD thesis, 2016
14T09	82.6882	30.6193	5140	6.7	0.7	Shen T.Y., PhD thesis, 2016
14T11	86.2263	29.5595	4935	9.2	0.7	Shen T.Y., PhD thesis, 2016
14T20	92.4103	29.2739	4191	12.3	1.6	Shen T.Y., PhD thesis, 2016
14T21	92.4118	29.2735	4058	12.6	1.7	Shen T.Y., PhD thesis, 2016
14T22	92.4138	29.2715	3912	10.2	1.2	Shen T.Y., PhD thesis, 2016
14T24	92.4131	29.2639	3660	9.3	1.1	Shen T.Y., PhD thesis, 2016
14T18	92.4169	29.2612	3477	8.4	1	Shen T.Y., PhD thesis, 2016
14T26	92.3994	29.255	3376	6.1	0.6	Shen T.Y., PhD thesis, 2016
K-7	102.168	29.6342	1160	1	0.4	Tan et al., 2010, Chinese Journal of Geophysics
K-8	102.218	29.7957	1412	1.8	0.5	Tan et al., 2010, Chinese Journal of Geophysics
K-9	102.162	30.0599	1374	0.6	0.2	Tan et al., 2010, Chinese Journal of Geophysics
K-11	101.976	30.0572	2473	1.6	0.5	Tan et al., 2010, Chinese Journal of Geophysics
K-12	101.977	29.5671	3190	0.4	0.2	Tan et al., 2010, Chinese Journal of Geophysics
K-13	101.981	29.5683	3216	1.1	0.4	Tan et al., 2010, Chinese Journal of Geophysics
K-14	101.986	29.5703	3173	2.7	0.7	Tan et al., 2010, Chinese Journal of Geophysics
K-15	102.009	29.5769	2903	1	0.3	Tan et al., 2010, Chinese Journal of Geophysics
K-16	102.009	29.5804	2919	0.7	0.2	Tan et al., 2010, Chinese Journal of Geophysics
K-17	102.029	29.5846	2662	0.6	0.2	Tan et al., 2010, Chinese Journal of Geophysics
K-18	102.083	29.6057	1951	0.2	0.1	Tan et al., 2010, Chinese Journal of Geophysics
K-19	102.106	29.6107	1807	1.2	0.5	Tan et al., 2010, Chinese Journal of Geophysics
BX-1	102.639	30.8776	3519	25.7	1.9	Tan et al., 2014, JAES
BX-2	102.682	30.8721	4056	27	3	Tan et al., 2014, JAES
BX-3	102.704	30.8404	3394	23.5	2	Tan et al., 2014, JAES
BX-6	102.729	30.8121	2485	10.7	1.3	Tan et al., 2014, JAES
BX-10	102.841	30.6363	2203	1.9	1.4	Tan et al., 2014, JAES
BX-11	102.868	30.6031	2268	2.9	0.8	Tan et al., 2014, JAES
BX-13	102.913	30.5289	1416	3.8	0.8	Tan et al., 2014, JAES
BX-14	102.859	30.4477	1254	5	0.4	Tan et al., 2014, JAES
BX-15	102.792	30.3413	976	2.7	0.4	Tan et al., 2014, JAES
GD-1	103.406	31.0614	1219	6.3	0.7	Tan et al., 2014, JAES
GD-9	102.913	30.9113	4355	8.1	1.1	Tan et al., 2014, JAES
GD-12	102.65	30.964	2728	11.6	1.7	Tan et al., 2014, JAES
Gong-78	102.729	30.788	2513	16.8	1	Tan et al., 2014, JAES
Gong-83	102.785	30.3143	956	4.4	0.4	Tan et al., 2014, JAES
Gong-90	102.887	30.5572	1513	3.9	0.4	Tan et al., 2014, JAES
Gong-92	102.915	30.512	1366	4	0.5	Tan et al., 2014, JAES
Gong-94	102.88	30.4614	1464	5	0.5	Tan et al., 2014, JAES
Gong-95	102.836	30.4093	1066	5.3	0.5	Tan et al., 2014, JAES
JY-1	104.737	31.8559	584	67.3	4.6	Tan et al., 2014, JAES
JY-2	104.732	31.8648	595	83.3	9.1	Tan et al., 2014, JAES
Kc0511	102.877	30.4645	1222	5.4	0.7	Tan et al., 2014, JAES
WCH-1	103.399	31.3273	1782	2.1	0.2	Tan et al., 2014, JAES
PW-12	104.713	32.3859	1121	24.4	1.9	Tan et al., 2014, JAES
Bo-6	102.057	30.997	2133	3.3	0.6	Tan et al., 2017, Lithosphere
Bo-11	101.868	31.023	1985	2	0.6	Tan et al., 2017, Lithosphere
Bo-13	101.837	31.027	2333	2.9	0.6	Tan et al., 2017, Lithosphere
Bo-15	101.873	30.893	2014	3.5	0.3	Tan et al., 2017, Lithosphere
Bo-16	101.871	30.874	1860	2.2	0.3	Tan et al., 2017, Lithosphere
Bo-18	101.8	30.828	2060	5.1	1	Tan et al., 2017, Lithosphere
Db-12	102.023	30.725	1790	2	0.3	Tan et al., 2017, Lithosphere
Db-13	101.851	30.861	1947	2.3	0.4	Tan et al., 2017, Lithosphere
Db-14	101.853	30.861	1947	1.8	0.3	Tan et al., 2017, Lithosphere
Db-15	101.729	30.777	2231	1.8	0.3	Tan et al., 2017, Lithosphere
Db-17	101.737	30.744	2466	1.6	0.3	Tan et al., 2017, Lithosphere
Ki-1	102.325	31.013	2326	9.7	0.9	Tan et al., 2017, Lithosphere
Ki-4	102.074	31.009	2142	5.8	0.6	Tan et al., 2017, Lithosphere
Ki-10	101.882	31.125	2012	4.2	0.5	Tan et al., 2017, Lithosphere
Ki-12	101.873	31.175	3190	6.4	0.5	Tan et al., 2017, Lithosphere
Ki-14	101.868	31.03	1991	3.3	0.5	Tan et al., 2017, Lithosphere
114*	101.903	31.153	2240	7.1	1.5	Tan et al., 2017, Lithosphere
116*	102.241	31.0283	2800	12	6.6	Tan et al., 2017, Lithosphere
01-11†	101.93	31.198	2840	8.43	0.87	Tan et al., 2017, Lithosphere
01-12†	101.926	31.195	2580	10	0.7	Tan et al., 2017, Lithosphere
01-13†	101.924	31.1937	2500	10.4	0.7	Tan et al., 2017, Lithosphere
01-14†	101.929	31.2042	3000	10.5	1.1	Tan et al., 2017, Lithosphere
01-15†	101.932	31.1733	2100	8.87	0.49	Tan et al., 2017, Lithosphere
GZ75	100.093	29.321	4242	125	10	Tian et al., 2014a, JGR
GZ76	100.154	29.394	4464	152	6	Tian et al., 2014a, JGR
GZ73	100.319	29.0319	3696	108	5	Tian et al., 2014a, JGR
GZ71	100.344	29.0195	4252	131	6	Tian et al., 2014a, JGR
GZ77	100.189	29.4518	4588	147	6	Tian et al., 2014a, JGR
GZ72	100.333	29.0188	3973	124	6	Tian et al., 2014a, JGR
GZ78	100.267	29.5138	4535	130	9	Tian et al., 2014a, JGR
GZ79	100.299	29.5556	4217	116	6	Tian et al., 2014a, JGR
GZ80	100.339	29.623	3936	99	6	Tian et al., 2014a, JGR
GZ68	100.538	29.0384	3442	95	4	Tian et al., 2014a, JGR
GZ69	100.636	29.0167	3150	57	3	Tian et al., 2014a, JGR
HS28	102.56	33.21	3465	105.6	5.1	Tian et al., 2014b, G-cube
HS27	102.65	33.46	3505	122.9	3	Tian et al., 2014b, G-cube
HS26	102.71	33.52	3501	112	3.5	Tian et al., 2014b, G-cube
HS25	102.88	33.57	3516	119.8	3.9	Tian et al., 2014b, G-cube
HS24	102.95	33.64	3540	118.2	6.7	Tian et al., 2014b, G-cube
HS23	102.96	33.73	3466	113.6	6.9	Tian et al., 2014b, G-cube
HS22	102.95	33.82	3478	123.2	8.1	Tian et al., 2014b, G-cube
HS21	103.08	33.59	3497	112.3	4.8	Tian et al., 2014b, G-cube
HS20	103.24	33.26	3634	113	6.6	Tian et al., 2014b, G-cube
GZ31	101.72	31.845	2772	8.9	0.4	Tian et al., 2015, GRL
GZ32	101.726	31.857	2947	10.7	0.4	Tian et al., 2015, GRL
GZ33	101.74	31.865	3174	11	1	Tian et al., 2015, GRL
GZ34	101.751	31.869	3387	13	0.6	Tian et al., 2015, GRL
GZ35	101.756	31.872	3537	14.5	0.6	Tian et al., 2015, GRL
GZ36	101.752	31.871	3771	17.2	1.7	Tian et al., 2015, GRL
GZ37	101.738	31.84	2447	10.4	0.3	Tian et al., 2015, GRL
HS36	102.756	32.221	4850	20.3	1.7	Tian et al., 2015, GRL
HS37	102.76	32.221	4705	17.4	1.2	Tian et al., 2015, GRL
HS38	102.784	32.238	3961	15	1.8	Tian et al., 2015, GRL
HS39	102.828	32.272	3580	9.2	0.5	Tian et al., 2015, GRL
HS40	102.844	32.28	3318	7.8	0.4	Tian et al., 2015, GRL
HS41	102.868	32.277	3040	8	0.5	Tian et al., 2015, GRL
HS42	102.898	32.192	2862	9.5	1.5	Tian et al., 2015, GRL
HS43	102.925	32.161	2560	8.6	1.7	Tian et al., 2015, GRL
HS15	104.531	32.433	865	40.8	4.1	Tian et al., 2018, Tectonics
HS16	104.541	32.524	867	60.3	4.3	Tian et al., 2018, Tectonics
HS17	104.56	32.619	1631	68.2	4.5	Tian et al., 2018, Tectonics
HS18	104.503	32.617	1608	41.8	3.7	Tian et al., 2018, Tectonics
HS19	104.403	32.708	1688	56	5.7	Tian et al., 2018, Tectonics
HS81	104.422	32.466	972			Tian et al., 2018, Tectonics
HS82	104.22	32.497	1143	34	3.3	Tian et al., 2018, Tectonics
HS83	104.122	32.518	1370	4.7	0.5	Tian et al., 2018, Tectonics
HS84	104.123	32.571	1523	4.5	0.6	Tian et al., 2018, Tectonics
HS85	103.964	32.751	2513	5.9	0.5	Tian et al., 2018, Tectonics
HS86	103.898	32.778	2896	7.8	1	Tian et al., 2018, Tectonics
HS87	103.749	32.744	3795	102.7	4.8	Tian et al., 2018, Tectonics
HS88	103.734	32.739	4007	111.8	5.2	Tian et al., 2018, Tectonics
NB-8	95.0086	29.5928	5370	0.5	0.1	Tu et al., 2015, JAES
NB-10	95.0025	29.5892	5040	0.9	0.1	Tu et al., 2015, JAES
NB-11	95.0031	29.5883	4990	0.9	0.1	Tu et al., 2015, JAES
NB-12	94.9986	29.5833	4610	1.8	0.2	Tu et al., 2015, JAES
NB-13	94.9958	29.5803	4400	1.5	0.1	Tu et al., 2015, JAES
NB-14	94.9858	29.5781	4100	1.2	0.2	Tu et al., 2015, JAES
NB-15	94.9736	29.5842	3800	1.6	0.2	Tu et al., 2015, JAES
NB-16	94.9619	29.5989	3500	2.2	0.3	Tu et al., 2015, JAES
NB-17	94.9392	29.5889	3060	3.5	0.5	Tu et al., 2015, JAES
APF-1	102.035	28.5271	2434	33.9	4.1	Wang et al., 2012, Tectonophysics
APF-2	102.035	28.527	2410	30.9	4	Wang et al., 2012, Tectonophysics
APF-3	102.035	28.527	2390	25.8	3.4	Wang et al., 2012, Tectonophysics
APF-4	102.035	28.5269	2210	20.2	2.9	Wang et al., 2012, Tectonophysics
APF-6	102.357	29.1409	920	13.2	2.8	Wang et al., 2012, Tectonophysics
APF-9	102.387	29.1681	1276	16.3	2.4	Wang et al., 2012, Tectonophysics
APF-10	102.386	29.1681	917	8.2	1	Wang et al., 2012, Tectonophysics
APF-11	102.303	28.9829	1892	17.7	2.4	Wang et al., 2012, Tectonophysics
APF-12	102.304	28.9829	1898	16.6	1.8	Wang et al., 2012, Tectonophysics
APF-13	102.304	28.9825	1887	16.8	1.8	Wang et al., 2012, Tectonophysics
KP01-21	90.785	35.429	5200	28.6	2.8	Wang et al., 2008, PNAS
P1407B1	90.022	34.978	4930	93.1	25.5	Wang et al., 2008, PNAS
P14-51	90.022	34.978	4930	40	5.5	Wang et al., 2008, PNAS
P14-52	90.022	34.978	4930	39.1	4.6	Wang et al., 2008, PNAS
P03-15B	91.12	34.63	5080	22.9	3.4	Wang et al., 2008, PNAS
P03-11B2	91.12	34.63	5080	46.7	2.7	Wang et al., 2008, PNAS
P0126HX	92.067	33.607	4690	38.2	1	Wang et al., 2008, PNAS
P0158HX	92.067	33.607	4690	27.3	4.3	Wang et al., 2008, PNAS
P0171HX	92.067	33.607	4690	39.4	5.5	Wang et al., 2008, PNAS
P172FT5	92.35	33.45	5640	65.2	9.9	Wang et al., 2008, PNAS
P171FT1	92.35	33.45	5640	55.5	7.5	Wang et al., 2008, PNAS
P172FT2	92.35	33.45	5550	55.8	5.4	Wang et al., 2008, PNAS
KL-4	93.97	35.55	4711	70.3	7.3	Wang et al., 2008, PNAS
KL-2	93.97	35.55	4694	72.7	9.3	Wang et al., 2008, PNAS
KL-1	93.97	35.55	4690	61.5	12.4	Wang et al., 2008, PNAS
SP19-1	92.905	34.56	5100	37.4	4.5	Wang et al., 2008, PNAS
SQ16	92.912	34.574	5350	39.4	4.2	Wang et al., 2008, PNAS
SQ22	92.912	34.574	5350	36.2	4.3	Wang et al., 2008, PNAS
SP17-01B1	92.9	34.52	5050	47.2	5.9	Wang et al., 2008, PNAS
AJX12-1	86.3223	29.5474	5179	18.9	1.4	Wang et al., 2015, Sci. Rep.
AJX12-2	86.3262	29.5493	5295	17.9	1.3	Wang et al., 2015, Sci. Rep.
AJX12-3	86.3313	29.5498	5500	21.4	1.8	Wang et al., 2015, Sci. Rep.
GDS12-1	82.0557	30.8495	5762	16.5	1.6	Wang et al., 2015, Sci. Rep.
GDS12-2	82.0555	30.8285	5603	23.4	1.7	Wang et al., 2015, Sci. Rep.
GDS12-3	82.0565	30.8314	5501	17.2	1.2	Wang et al., 2015, Sci. Rep.
GDS12-4	82.0964	30.8612	5301	19	1.6	Wang et al., 2015, Sci. Rep.
GDS12-5	82.047	30.8361	5473	17.9	1.4	Wang et al., 2015, Sci. Rep.
GDS12-6	82.0258	30.8315	5406	17	1.1	Wang et al., 2015, Sci. Rep.
GDS12-7	81.984	30.8015	5117	18.5	1.4	Wang et al., 2015, Sci. Rep.
NT-3	90.5328	30.0986		12	1.7	Wang et al., 2007, JAES
NT-4	90.5902	30.1901		8.5	2.7	Wang et al., 2007, JAES
NT-6	91.6721	31.0352		33.1	2.8	Wang et al., 2007, JAES
NT-7	91.6475	31.9084		39.9	4.7	Wang et al., 2007, JAES
NT-9	91.4848	32.0018		105	7.5	Wang et al., 2007, JAES
NT-10	91.5656	32.1761		38.2	4.8	Wang et al., 2007, JAES
NT-12	92.0353	33.0669		150.7	8.1	Wang et al., 2007, JAES
LMW-01	103.636	31.3833	4174	56.5	39.6	Wang et al., 2012, Nat. Geosci.
LMW-02	103.64	31.388	4009	27.6	16.2	Wang et al., 2012, Nat. Geosci.
LMW-05	103.653	31.4128	3385	297.1	31.2	Wang et al., 2012, Nat. Geosci.
LMW-06	103.653	31.4156	3212	17.8	21.2	Wang et al., 2012, Nat. Geosci.
LMW-07	103.662	31.4309	1908	27.2	17.4	Wang et al., 2012, Nat. Geosci.
LMW-08	103.653	31.443	1670	19.9	8.4	Wang et al., 2012, Nat. Geosci.
LME-09	103.648	31.2907	2900	27	8.2	Wang et al., 2012, Nat. Geosci.
LME-11	103.653	31.2874	2500	19.8	6	Wang et al., 2012, Nat. Geosci.
LME-13	103.654	31.2853	2100	23.5	5.6	Wang et al., 2012, Nat. Geosci.
LME-14	103.657	31.2848	2000	18.4	6.2	Wang et al., 2012, Nat. Geosci.
LME-15	103.66	31.283	1800	17.3	5.4	Wang et al., 2012, Nat. Geosci.
LME-16	103.652	31.2676	1550	21.3	11.4	Wang et al., 2012, Nat. Geosci.
LME-17	103.647	31.2289	1430	23	5.6	Wang et al., 2012, Nat. Geosci.
LME-18	103.644	31.2165	1390	24.7	1.7	Wang et al., 2012, Nat. Geosci.
LME-19	103.659	31.174	1280	15.1	5.4	Wang et al., 2012, Nat. Geosci.
LME-20	103.669	31.1607	1160	15	4.4	Wang et al., 2012, Nat. Geosci.
HL21	102.35	27.0708	1573	8.4	0.8	Wang et al., 2017, JSG
HL22	102.324	27.0364	2434	10.3	0.7	Wang et al., 2017, JSG
HL05	102.329	27.03	2734	13.3	1.4	Wang et al., 2017, JSG
DC02	102.347	27.092	1479	4.8	0.5	Wang et al., 2017, JSG
DC03	102.351	27.071	1563	6.5	0.7	Wang et al., 2017, JSG
DC04	102.34	27.069	1684	10.4	0.7	Wang et al., 2017, JSG
DC06	102.286	27.022	1983	11.9	0.9	Wang et al., 2017, JSG
DC14	102.319	27.033	2342	12	0.7	Wang et al., 2017, JSG
YA25	98.61	28.99	2430	3	1.9	Wilson and Fowler, 2011, GSA Bulletin
YA23	98.63	29.2	3480	10.9	1.4	Wilson and Fowler, 2011, GSA Bulletin
YA24	98.61	29.06	2707	4.2	0.7	Wilson and Fowler, 2011, GSA Bulletin
YA21	98.64	29.44	3672	43.7	6.8	Wilson and Fowler, 2011, GSA Bulletin
YA14	98.67	29.28	4142	59.4	10	Wilson and Fowler, 2011, GSA Bulletin
YA22	98.66	29.22	3790	17	1.7	Wilson and Fowler, 2011, GSA Bulletin
YA15	98.67	29.74	3718	70.9	5.9	Wilson and Fowler, 2011, GSA Bulletin
456*	99.07	29.37	2748	9.9	1.1	Wilson and Fowler, 2011, GSA Bulletin
YA17	98.82	29.72	3361	23	7	Wilson and Fowler, 2011, GSA Bulletin
YA30	99.15	29.3	2778	11.9	2.8	Wilson and Fowler, 2011, GSA Bulletin
457*	99.07	29.39	2614	5.9	0.8	Wilson and Fowler, 2011, GSA Bulletin
YA31	99.07	29.33	2898	16.9	2.9	Wilson and Fowler, 2011, GSA Bulletin
460*	99.07	29.44	2619	8.1	1.2	Wilson and Fowler, 2011, GSA Bulletin
YA19	98.98	29.76	2516	23	8.5	Wilson and Fowler, 2011, GSA Bulletin
YA06	99.58	29.14	3339	41.1	4.5	Wilson and Fowler, 2011, GSA Bulletin
YA33	100.04	30.14	4100	18	7	Wilson and Fowler, 2011, GSA Bulletin
393	100.32	29.88	4057	91.5	5.1	Wilson and Fowler, 2011, GSA Bulletin
YA34	100.32	30.02	4190	74	4.8	Wilson and Fowler, 2011, GSA Bulletin
YA35	100.64	30.14	4445	83.3	4.7	Wilson and Fowler, 2011, GSA Bulletin
YA36	100.9	29.98	3729	29.3	3	Wilson and Fowler, 2011, GSA Bulletin
353	100.87	30	4163	97.8	6.5	Wilson and Fowler, 2011, GSA Bulletin
YA37	100.95	30.01	3203	28.8	3.8	Wilson and Fowler, 2011, GSA Bulletin
YA38	100.99	30.04	2711	16.6	1.4	Wilson and Fowler, 2011, GSA Bulletin
350	101.03	30.04	3513	20.6	2.3	Wilson and Fowler, 2011, GSA Bulletin
068	101.62	30.11	3748	13.4	3.4	Wilson and Fowler, 2011, GSA Bulletin
YA39	101.38	30.05	4290	82.6	14.4	Wilson and Fowler, 2011, GSA Bulletin
365	99.92	30.22	4255	22.6	3.8	Wilson and Fowler, 2011, GSA Bulletin
LM12	101.53	30.29	3753	85.7	7.5	Wilson and Fowler, 2011, GSA Bulletin
YA40	101.38	30.05	4290	82.6	14.42	Wilson and Fowler, 2011, GSA Bulletin
YA41	102.22	29.83	1300	6.9	4.7	Wilson and Fowler, 2011, GSA Bulletin
YA42	102.22	29.83	1580	5.7	1.2	Wilson and Fowler, 2011, GSA Bulletin
YA43	102.22	29.8	2150	25.7	12.5	Wilson and Fowler, 2011, GSA Bulletin
YA44	102.25	29.84	2251	40.2	19.7	Wilson and Fowler, 2011, GSA Bulletin
YA46	102.34	29.88	1955	0	0	Wilson and Fowler, 2011, GSA Bulletin
YA47	102.76	30.04	750	34.4	6.3	Wilson and Fowler, 2011, GSA Bulletin
HKT15	103.17	31.02	2081	4.9	0.9	Wilson and Fowler, 2011, GSA Bulletin
KD10	102.16	30.32	2265	9	2.48	Wilson and Fowler, 2011, GSA Bulletin
KD11	102.13	30.38	1832	3.8	1.2	Wilson and Fowler, 2011, GSA Bulletin
005	102.73	30.79	2677	37.7	4.8	Wilson and Fowler, 2011, GSA Bulletin
008	102.66	30.85	3951	59.4	6.8	Wilson and Fowler, 2011, GSA Bulletin
009	102.65	30.94	3443	42.1	7.6	Wilson and Fowler, 2011, GSA Bulletin
LM01	102.72	31.08	799	153.5	12.9	Wilson and Fowler, 2011, GSA Bulletin
LM03	103.49	31.14	987	7.7	4.52	Wilson and Fowler, 2011, GSA Bulletin
LM04	103.49	31.2	998	8.9	2.5	Wilson and Fowler, 2011, GSA Bulletin
LM07	103.45	31.07	1014	4.9	0.6	Wilson and Fowler, 2011, GSA Bulletin
LM09	101.84	30.87	2939	3.8	0.6	Wilson and Fowler, 2011, GSA Bulletin
LM14	101.92	29.99	3280	1.2	0.2	Wilson and Fowler, 2011, GSA Bulletin
LM16	102.09	30.08	2032	5.5	0.7	Wilson and Fowler, 2011, GSA Bulletin
LM17	102.15	30.07	1478	4.6	0.7	Wilson and Fowler, 2011, GSA Bulletin
YA07	99.21	28.26	2764	22.4	3.8	Wilson and Fowler, 2011, GSA Bulletin
YA08	99.06	28.34	4321	130.7	32.7	Wilson and Fowler, 2011, GSA Bulletin
YA09	99.06	28.36	4537	13.2	1.2	Wilson and Fowler, 2011, GSA Bulletin
YA10	99.02	28.37	4236	39.2	5.4	Wilson and Fowler, 2011, GSA Bulletin
YA11	98.96	28.43	3608	17.2	2.5	Wilson and Fowler, 2011, GSA Bulletin
YA16	98.67	29.74	3682	39	4.1	Wilson and Fowler, 2011, GSA Bulletin
YA26	98.62	28.97	2707	42.5	8.1	Wilson and Fowler, 2011, GSA Bulletin
YA28	98.82	28.49	2726	11.2	3.8	Wilson and Fowler, 2011, GSA Bulletin
406	99.72	31.62	3550	7.1	1	Wilson and Fowler, 2011, GSA Bulletin
413	98.65	31.96	3300	47	4.2	Wilson and Fowler, 2011, GSA Bulletin
421	98.3	31.56	3250	16.8	7.9	Wilson and Fowler, 2011, GSA Bulletin
426	98.93	31.94	4900	6.1	1.4	Wilson and Fowler, 2011, GSA Bulletin
KD29	102.04	28.44	2096	34.8	12.9	Wilson and Fowler, 2011, GSA Bulletin
KD31	102.22	28.3	1671	5.6	0.9	Wilson and Fowler, 2011, GSA Bulletin
KD49	101.53	26.8	1968	27.8	3	Wilson and Fowler, 2011, GSA Bulletin
KD58	101.35	27.06	1499	100	7.3	Wilson and Fowler, 2011, GSA Bulletin
KD59	101.41	26.98	1255	35.3	6.8	Wilson and Fowler, 2011, GSA Bulletin
KD60	101.55	26.77	2198	27.6	1.5	Wilson and Fowler, 2011, GSA Bulletin
KD61	101.76	26.47	1162	25.5	2	Wilson and Fowler, 2011, GSA Bulletin
KD63	101.78	26.3	1643	54.8	19	Wilson and Fowler, 2011, GSA Bulletin
0571-1	94.2766	30.1429	4680	8.8	1.4	Xiang et al., 2007, Earth Sciences
0850-1	93.4272	30.3438	3635	4.1	0.9	Xiang et al., 2007, Earth Sciences
0860-1	93.4293	30.4018	4063	8	1.5	Xiang et al., 2007, Earth Sciences
0864-1	93.4241	30.4196	5159	4	0.9	Xiang et al., 2007, Earth Sciences
0867-1	93.2586	30.4464	4460	5.9	1	Xiang et al., 2007, Earth Sciences
0868-1	93.2897	30.4375	4624	4.3	0.7	Xiang et al., 2007, Earth Sciences
0870-1	93.2224	30.8438	4992	5.3	1.5	Xiang et al., 2007, Earth Sciences
0898-1	94.3345	30.7812	5185	8.1	1.3	Xiang et al., 2007, Earth Sciences
0900-1	94.3614	30.8214	4946	11.7	1.4	Xiang et al., 2007, Earth Sciences
0903-1	94.3914	30.7946	4452	5.6	1.9	Xiang et al., 2007, Earth Sciences
P9Ft3-6	94.4224	30.7634	4200	6	1.1	Xiang et al., 2007, Earth Sciences
TL09-18A	98.9	28.35	2824	15.3	1.1	Xiao et al., 2015, Quarter. Sci.
TL09-19	98.9	28.35	3021	21	1.2	Xiao et al., 2015, Quarter. Sci.
TL09-20	98.92	28.44	3527	42	2.8	Xiao et al., 2015, Quarter. Sci.
79	101.03	30.767	2830	25.3	6.9	Xu and Kamp, 2000, JGR
58	101.643	30.567	3280	2.4	2.4	Xu and Kamp, 2000, JGR
57	101.617	30.548	3480	3.1	0.6	Xu and Kamp, 2000, JGR
59	101.65	30.578	3000	2.9	2.1	Xu and Kamp, 2000, JGR
1	101.542	30.04	3480	47.5	21.1	Xu and Kamp, 2000, JGR
83	101.263	30.833	3525	21	12.7	Xu and Kamp, 2000, JGR
60	100.377	31.547	3430	10.6	1.7	Xu and Kamp, 2000, JGR
61	100.382	31.552	3420	15.2	3.6	Xu and Kamp, 2000, JGR
75	100.663	31.372	3500	18.8	1.7	Xu and Kamp, 2000, JGR
73	100.66	31.348	3630	20.6	1.5	Xu and Kamp, 2000, JGR
77	100.667	31.377	3440	22.1	1.4	Xu and Kamp, 2000, JGR
76	100.665	31.375	3400	16.8	1.5	Xu and Kamp, 2000, JGR
87	101.13	30.967	2997	30	18.3	Xu and Kamp, 2000, JGR
62	100.383	31.562	3400	11.2	3.8	Xu and Kamp, 2000, JGR
64	100.393	31.565	3360	18.8	2.7	Xu and Kamp, 2000, JGR
63	100.39	31.564	3360	18.4	5.8	Xu and Kamp, 2000, JGR
65	100.397	31.567	3350	13.8	2.8	Xu and Kamp, 2000, JGR
74	100.667	31.367	3520	19.8	2.2	Xu and Kamp, 2000, JGR
66	100.593	31.433	3240	14.8	3.3	Xu and Kamp, 2000, JGR
67	100.617	31.417	3235	12.7	2.2	Xu and Kamp, 2000, JGR
88	101.11	30.997	2980	7.4	3.1	Xu and Kamp, 2000, JGR
68	100.68	31.442	3200	14.4	3.2	Xu and Kamp, 2000, JGR
71	100.655	31.345	3660	17.7	1.7	Xu and Kamp, 2000, JGR
69	100.683	31.45	3200	7.2	2.4	Xu and Kamp, 2000, JGR
72	100.658	31.347	3645	11.6	1.4	Xu and Kamp, 2000, JGR
89	101.113	30.993	2990	5.4	0.6	Xu and Kamp, 2000, JGR
70	100.697	31.483	3210	13.2	3	Xu and Kamp, 2000, JGR
81	101.125	30.95	2950	20.9	15.4	Xu and Kamp, 2000, JGR
90	101.117	30.995	3000	5.9	3	Xu and Kamp, 2000, JGR
82	101.128	30.958	2930	24.8	5.3	Xu and Kamp, 2000, JGR
91	101.117	31	3100	11.8	3.5	Xu and Kamp, 2000, JGR
92	101.16	31.01	3640	15.4	2.6	Xu and Kamp, 2000, JGR
97	101.25	30.825	3730	71	4.2	Xu and Kamp, 2000, JGR
98	101.251	30.826	3730	69.6	4.3	Xu and Kamp, 2000, JGR
48	101.505	30.257	3830	84.4	3.9	Xu and Kamp, 2000, JGR
93	101.235	31.023	4540	18.2	4.3	Xu and Kamp, 2000, JGR
99	101.254	30.828	3720	84	7	Xu and Kamp, 2000, JGR
100	101.257	30.831	3665	69.3	7	Xu and Kamp, 2000, JGR
49	101.505	30.257	3825	77.6	3.4	Xu and Kamp, 2000, JGR
95	101.008	31.008	3920	24.7	4.1	Xu and Kamp, 2000, JGR
96	101.006	31.003	4040	17.3	5.4	Xu and Kamp, 2000, JGR
101	101.258	30.833	3660	85.4	6.1	Xu and Kamp, 2000, JGR
50	101.505	30.257	3805	78.9	6.9	Xu and Kamp, 2000, JGR
53	101.508	30.245	3585	80.2	3.7	Xu and Kamp, 2000, JGR
51	101.507	30.255	3785	73.1	3.8	Xu and Kamp, 2000, JGR
52	101.507	30.25	3730	71.4	3.7	Xu and Kamp, 2000, JGR
94	101.238	31.027	4560	18.1	5.7	Xu and Kamp, 2000, JGR
54	101.508	30.246	3590	71.6	4.4	Xu and Kamp, 2000, JGR
55	101.533	30.283	3760	69.3	5.6	Xu and Kamp, 2000, JGR
56	101.517	30.253	3560	83.8	4	Xu and Kamp, 2000, JGR
114	101.903	31.153	2240	7.1	1.5	Xu and Kamp, 2000, JGR
2	101.806	30.0759	4290	2.7	0.4	Xu and Kamp, 2000, JGR
3	101.888	29.9933	3200	1.9	0.2	Xu and Kamp, 2000, JGR
4	101.901	29.9895	3112	1.6	0.4	Xu and Kamp, 2000, JGR
5	101.911	29.9891	3062	2.3	0.8	Xu and Kamp, 2000, JGR
6	101.929	29.9858	3004	2.6	1.5	Xu and Kamp, 2000, JGR
7	101.936	29.989	2983	2.9	0.5	Xu and Kamp, 2000, JGR
8	101.939	29.9931	2983	1.8	0.3	Xu and Kamp, 2000, JGR
9	101.948	30.0007	2870	1.9	0.3	Xu and Kamp, 2000, JGR
10	101.947	29.9999	2868	2.6	0.5	Xu and Kamp, 2000, JGR
11	101.952	30.0099	2806	2	0.5	Xu and Kamp, 2000, JGR
12	101.951	30.0137	2795	2.1	0.5	Xu and Kamp, 2000, JGR
13	101.981	30.0575	2503	14.3	2.6	Xu and Kamp, 2000, JGR
14	101.983	30.0576	2485	9.8	4.1	Xu and Kamp, 2000, JGR
15	101.993	30.0597	2450	6.8	1.1	Xu and Kamp, 2000, JGR
16	102.015	30.0777	2330	7.6	1.1	Xu and Kamp, 2000, JGR
17	102.023	30.0844	2260	4.5	1.1	Xu and Kamp, 2000, JGR
18	102.024	30.0847	2257	5.8	1.2	Xu and Kamp, 2000, JGR
19	102.034	30.0915	2182	6.5	1.3	Xu and Kamp, 2000, JGR
20	102.063	30.0859	2030	5.4	1	Xu and Kamp, 2000, JGR
21	102.064	30.0853	2020	7.7	1	Xu and Kamp, 2000, JGR
22	102.013	29.7	2345	3.4	0.6	Xu and Kamp, 2000, JGR
23	102.015	29.7	2340	1.8	0.6	Xu and Kamp, 2000, JGR
24	102.016	29.708	2320	1.2	0.3	Xu and Kamp, 2000, JGR
25	102.017	29.717	2288	2.1	0.3	Xu and Kamp, 2000, JGR
26	102.025	29.725	2280	1.7	0.7	Xu and Kamp, 2000, JGR
27	102.033	29.733	2280	2	0.3	Xu and Kamp, 2000, JGR
28	102.038	29.7	2110	1.5	0.4	Xu and Kamp, 2000, JGR
29	102.04	29.7	2110	2.5	1.5	Xu and Kamp, 2000, JGR
30	102.042	29.7	2110	1.6	0.3	Xu and Kamp, 2000, JGR
31	102.035	29.695	2120	3.5	0.9	Xu and Kamp, 2000, JGR
32	102.047	29.695	2120	6.4	1.1	Xu and Kamp, 2000, JGR
33	102.057	29.692	2120	6	1.4	Xu and Kamp, 2000, JGR
34	102.142	29.633	1380	12.6	3.5	Xu and Kamp, 2000, JGR
35	102.143	29.625	1380	7.8	0.9	Xu and Kamp, 2000, JGR
36	102.143	29.62	1365	13.6	1.4	Xu and Kamp, 2000, JGR
37	102.143	29.617	1382	21.2	5.3	Xu and Kamp, 2000, JGR
38	102.143	29.533	1210	5.6	2.8	Xu and Kamp, 2000, JGR
39	102.145	29.533	1154	21.9	3.7	Xu and Kamp, 2000, JGR
40	102.15	29.533	1125	15.6	5.7	Xu and Kamp, 2000, JGR
41	102.158	29.533	1084	5.6	1.2	Xu and Kamp, 2000, JGR
42	102.162	29.533	1070	12.1	1.9	Xu and Kamp, 2000, JGR
43	102.167	29.533	1082	10.4	1.3	Xu and Kamp, 2000, JGR
44	102.18	29.5	1007	23.1	5.8	Xu and Kamp, 2000, JGR
45	102.18	29.492	1010	22.9	9.1	Xu and Kamp, 2000, JGR
47	102.18	29.483	1002	9.1	5.4	Xu and Kamp, 2000, JGR
78	100.417	31.562	3420	18.3	4	Xu and Kamp, 2000, JGR
102	100.41	31.48	2915	3.2	1.4	Xu and Kamp, 2000, JGR
104	100.47	31.57	2982	4	0.7	Xu and Kamp, 2000, JGR
105	102.2	29.94	1368	24.3	4	Xu and Kamp, 2000, JGR
107	102.215	29.94	1346	12	8.7	Xu and Kamp, 2000, JGR
108	102.22	29.95	1351	10	5.9	Xu and Kamp, 2000, JGR
109	102.225	29.96	1392	19.1	7	Xu and Kamp, 2000, JGR
110	102.23	29.97	1356	14.2	5.5	Xu and Kamp, 2000, JGR
111	102.235	29.985	1340	13.4	4.4	Xu and Kamp, 2000, JGR
112	102.24	29.99	1394	11.4	5.8	Xu and Kamp, 2000, JGR
113	102.26	29.98	2608	10.5	10.8	Xu and Kamp, 2000, JGR
115	102.671	30.597	2880	7.7	1.7	Xu and Kamp, 2000, JGR
116	102.242	31.028	2800	12	6.6	Xu and Kamp, 2000, JGR
117	102.693	30.98	2720	12	1.9	Xu and Kamp, 2000, JGR
118	102.883	30.962	3800	14.5	3.6	Xu and Kamp, 2000, JGR
119	102.9	30.913	4487	17.1	2.3	Xu and Kamp, 2000, JGR
BB02	105.4	32.74	1031	70	6	Yan et al., 2011, Tectonics
BB04	105.41	32.73	957	51	4	Yan et al., 2011, Tectonics
BQ026	105.47	32.7	867	31	4	Yan et al., 2011, Tectonics
BL045	105.7	32.37	470	62	4	Yan et al., 2011, Tectonics
BL042	105.6	32.46	459	75	5	Yan et al., 2011, Tectonics
BL044	105.67	32.42	446	55	4	Yan et al., 2011, Tectonics
ADS-1	91.8565	32.0986		39.8	2.2	Yang et al., 1999, Rad. Meas.
SGLS-1	91.876	32.0156		33.1	2.8	Yang et al., 1999, Rad. Meas.
KL-1	91.3455	30.631		35.8	2.3	Yang et al., 1999, Rad. Meas.
YBJ-1	90.6225	30.0349		17.3	1.4	Yang et al., 1999, Rad. Meas.
KLG-1	91.0404	29.8221		22.2	2.3	Yang et al., 1999, Rad. Meas.
LS-1	91.1602	29.7212		26.5	2.1	Yang et al., 1999, Rad. Meas.
QS-1	90.7757	29.5998		19.2	1.6	Yang et al., 1999, Rad. Meas.
QS-2	90.7757	29.5998		17.6	1.3	Yang et al., 1999, Rad. Meas.
NM-1	90.3898	29.5853		13.2	1.2	Yang et al., 1999, Rad. Meas.
DZK-1	89.9357	29.5853		31.7	2.1	Yang et al., 1999, Rad. Meas.
NJ1	98.871	26.2652	967	8.7	1.7	Yang et al., 2016, EPSL
NJ2	98.8629	26.2995	998	7	0.9	Yang et al., 2016, EPSL
NJ3	98.8999	26.5246	1072	7.3	0.8	Yang et al., 2016, EPSL
NJ5	98.8567	26.9265	1620	6.4	0.9	Yang et al., 2016, EPSL
NJ10	98.8573	27.1287	1418	3.4	0.5	Yang et al., 2016, EPSL
NJ18	98.5831	28.0706	1582	9.8	2.1	Yang et al., 2016, EPSL
NJ21	98.6159	27.7535	1674	5.7	1.3	Yang et al., 2016, EPSL
LCJ6	99.3497	26.9793	2131	5.4	1.1	Yang et al., 2016, EPSL
LCJ9	99.0069	27.6334	1761	5.2	0.8	Yang et al., 2016, EPSL
MK08	98.9042	28.3916	3030	13.5	1.3	Yang et al., 2016, EPSL
MK09	98.617	29.1103	2543	6.3	0.7	Yang et al., 2016, EPSL
YAN05	99.7715	26.7777	2143	53.5	5.7	Yang et al., 2016, EPSL
DXL-01	94.9483	29.4883	4210	3.6	0.4	Yu et al., 2011, Chinese Sci. Bull.
DXL-02	94.9556	29.4903	4106	3.9	0.6	Yu et al., 2011, Chinese Sci. Bull.
DXL-03	94.9564	29.4856	4014	4.6	0.6	Yu et al., 2011, Chinese Sci. Bull.
DXL-05	94.9794	29.4753	3575	3.2	0.4	Yu et al., 2011, Chinese Sci. Bull.
DXL-06	95	29.4706	3276	2.8	0.4	Yu et al., 2011, Chinese Sci. Bull.
DXL-07	95.02	29.4506	3042	2.7	0.4	Yu et al., 2011, Chinese Sci. Bull.
DXL-10	95.1269	29.3678	2190	1.7	0.3	Yu et al., 2011, Chinese Sci. Bull.
DXL-12	95.1533	29.3525	1784	2.4	0.5	Yu et al., 2011, Chinese Sci. Bull.
DXL-15	95.1767	29.3083	944	2.2	0.4	Yu et al., 2011, Chinese Sci. Bull.
DXL-17	95.1692	29.2836	862	10.4	2.3	Yu et al., 2011, Chinese Sci. Bull.
DXL-19	95.1644	29.2475	710	1.7	0.3	Yu et al., 2011, Chinese Sci. Bull.
LY2	90.8883	29.6883	3720	21.4	2.1	Yuan et al., 2002, Chinese Sci. Bull.
LY9	90.5933	30.0483	4030	9.8	0.6	Yuan et al., 2002, Chinese Sci. Bull.
LY10	90.5517	30.0867	4250	6.9	0.6	Yuan et al., 2002, Chinese Sci. Bull.
LY14	91.155	30.4983	4320	20.2	1.3	Yuan et al., 2002, Chinese Sci. Bull.
LY17-1	90.545	30.095	4340	8.8	0.6	Yuan et al., 2002, Chinese Sci. Bull.
LY19	90.475	30.09	4250	3	0.6	Yuan et al., 2002, Chinese Sci. Bull.
LY15	90.9217	30.38	4400	14.6	1	Yuan et al., 2002, Chinese Sci. Bull.
LY13	91.245	30.5183	4390	47.6	3.4	Yuan et al., 2002, Chinese Sci. Bull.
NGL1	91.8083	29.2533	3770	29	2.1	Yuan et al., 2002, Chinese Sci. Bull.
NGL2	91.8067	29.3217	3600	29.9	2.2	Yuan et al., 2002, Chinese Sci. Bull.
LL13	90.6867	29.3217	3600	37.2	2.1	Yuan et al., 2002, Chinese Sci. Bull.
LL23	90.68	29.35	3600	21.1	1.2	Yuan et al., 2002, Chinese Sci. Bull.
LLR17	89.08	29.4967	3940	16.4	0.8	Yuan et al., 2002, Chinese Sci. Bull.
LLR18	89.075	29.4967	4250	15.3	0.8	Yuan et al., 2002, Chinese Sci. Bull.
LL14	90.9917	29.6	3670	18.3	1.1	Yuan et al., 2002, Chinese Sci. Bull.
LL1-2	90.4	28.985	4510	17.2	1.6	Yuan et al., 2002, Chinese Sci. Bull.
LL5-2	90.3933	29.0917	4470	15.3	1.9	Yuan et al., 2002, Chinese Sci. Bull.
LL10	90.6167	29.195	4660	13.6	1	Yuan et al., 2002, Chinese Sci. Bull.
LL12	90.6867	29.235	4060	17	1.7	Yuan et al., 2002, Chinese Sci. Bull.
LLR1	89.3812	29.8022	4360	46	12	Yuan et al., 2007, Acta Petrologica Sinica
LLR2	89.3845	29.7778	4320	5.9	0.7	Yuan et al., 2007, Acta Petrologica Sinica
LLR3	89.3848	29.7398	4300	5.2	0.6	Yuan et al., 2007, Acta Petrologica Sinica
LLR4	89.2425	29.7443	4200	8.7	1	Yuan et al., 2007, Acta Petrologica Sinica
LLR6	89.1137	29.6848	4050	19	3	Yuan et al., 2007, Acta Petrologica Sinica
LNM1	90.215	29.4083	3800	8.8	0.8	Yuan et al., 2009, Island Arc
LNM2	90.2168	29.3954	3840	9	0.7	Yuan et al., 2009, Island Arc
LNM3	90.2147	29.3859	3750	7.7	0.6	Yuan et al., 2009, Island Arc
LNM4	90.2138	29.3725	3780	9.7	1.2	Yuan et al., 2009, Island Arc
LNM5	90.223	29.3623	3800	6.8	0.6	Yuan et al., 2009, Island Arc
Li21	99.3969	30.4144	3630	19.1	1.6	Zhang et al., 2015, Tectonics
Li22	99.4133	30.4217	3710	17.2	1.3	Zhang et al., 2015, Tectonics
Li23	99.4426	30.4296	3850	13.4	1.1	Zhang et al., 2015, Tectonics
Li24	99.5478	30.5119	4820	11.2	1	Zhang et al., 2015, Tectonics
Li26	99.5461	30.512	4720	7.1	0.8	Zhang et al., 2015, Tectonics
Li28	99.5487	30.5085	4510	5.7	0.7	Zhang et al., 2015, Tectonics
Li29	99.5519	30.5083	4410	5.6	0.7	Zhang et al., 2015, Tectonics
Li30	99.554	30.5075	4285	5.5	0.9	Zhang et al., 2015, Tectonics
CD47	99.9813	30.1805	4230	10.8	1.3	Zhang et al., 2015, Tectonics
CD46	99.9814	30.1811	4260	13	1.4	Zhang et al., 2015, Tectonics
CD45	99.9825	30.1846	4387	12.6	1.4	Zhang et al., 2015, Tectonics
CD44	99.9816	30.1874	4541	13.9	1.8	Zhang et al., 2015, Tectonics
CD43	99.9807	30.1911	4656	16.1	1.8	Zhang et al., 2015, Tectonics
Li31	99.5549	30.5068	4200	4.5	0.5	Zhang et al., 2015, Tectonics
CD21-1	101.65	30.58	3120	2.7	0.8	Zhang et al., 2017, EPSL
G26	101.65	30.58	3102	2.8	0.8	Zhang et al., 2017, EPSL
CD26-4	101.62	30.55	3442	1.9	0.6	Zhang et al., 2017, EPSL
G21	101.62	30.54	3432	2	0.5	Zhang et al., 2017, EPSL
G18	101.7	30.45	4434	4.2	1	Zhang et al., 2017, EPSL
G16	101.52	30.26	3572	88	3.9	Zhang et al., 2017, EPSL
G17	101.7	30.45	4297	3	0.9	Zhang et al., 2017, EPSL
CD01-1	102.14	30.07	1520	2.9	0.6	Zhang et al., 2017, EPSL
CD06-1	101.99	30.06	2451	4.6	0.9	Zhang et al., 2017, EPSL
CD08-1	101.95	30.02	2738	2.5	0.4	Zhang et al., 2017, EPSL
CD09-2	101.94	30	2961	2.5	0.3	Zhang et al., 2017, EPSL
CD10-3	101.94	29.99	3022	1.8	0.2	Zhang et al., 2017, EPSL
CD12	101.89	29.99	3242	3.1	0.6	Zhang et al., 2017, EPSL
CD14-4	101.83	30.05	3880	3.4	0.5	Zhang et al., 2017, EPSL
CD17	101.87	30	3456	3.2	0.5	Zhang et al., 2017, EPSL
CD18	101.81	30.08	4270	4.5	0.8	Zhang et al., 2017, EPSL
CD19	101.81	30.09	4680	5	0.9	Zhang et al., 2017, EPSL
G10	101.74	30.18	4387	3.6	0.6	Zhang et al., 2017, EPSL
G11	101.75	30.19	4302	3.4	0.7	Zhang et al., 2017, EPSL
G14	101.78	30.26	3738	2.7	0.5	Zhang et al., 2017, EPSL
G15	101.81	30.26	3514	2.6	0.4	Zhang et al., 2017, EPSL
A58	101.86	26.72	1020	33	3.1	Zhang Y.Z., PhD thesis, 2015
A60	101.91	26.72	1030	24	1.7	Zhang Y.Z., PhD thesis, 2015
A62	102.08	26.84	1080	31	3.6	Zhang Y.Z., PhD thesis, 2015
A63	102.14	28.06	1570	28	1.6	Zhang Y.Z., PhD thesis, 2015
A64	102.1	28.06	1610	28	1.2	Zhang Y.Z., PhD thesis, 2015
A65	102.05	28.09	1710	26	3.8	Zhang Y.Z., PhD thesis, 2015
A66	102.02	28.1	1850	17	1.9	Zhang Y.Z., PhD thesis, 2015
A67	102	28.11	2040	18	1.5	Zhang Y.Z., PhD thesis, 2015
A69	102	28.37	2360	16	1.5	Zhang Y.Z., PhD thesis, 2015
A71	101.94	28.33	2080	12	1.5	Zhang Y.Z., PhD thesis, 2015
A72	101.91	28.32	1790	7	1.7	Zhang Y.Z., PhD thesis, 2015
A78	101.74	28.53	1570	13	1.5	Zhang Y.Z., PhD thesis, 2015
A83	102.34	29.07	1510	14	3.9	Zhang Y.Z., PhD thesis, 2015
A85	102.36	29.14	1200	10	1.7	Zhang Y.Z., PhD thesis, 2015
A88	102.52	29.29	970	19	3	Zhang Y.Z., PhD thesis, 2015
GZ33	99.9	31.3	4288	123	7.7	Zhang Y.Z., PhD thesis, 2015
GZ36	99.81	31.2	4431	109	6.4	Zhang Y.Z., PhD thesis, 2015
GZ38	99.78	31.15	4286	112	5.6	Zhang Y.Z., PhD thesis, 2015
L41	100.34	29.62	4133	106	6.3	Zhang Y.Z., PhD thesis, 2015
L42	100.32	29.6	4155	113	7	Zhang Y.Z., PhD thesis, 2015
L47	100.19	29.45	4606	143	10.4	Zhang Y.Z., PhD thesis, 2015
L48	100.18	29.43	4645	143	7.3	Zhang Y.Z., PhD thesis, 2015
L50	100.11	29.34	4388	116	10	Zhang Y.Z., PhD thesis, 2015

## Sheet: ZHe
Dataset S5C. A collection of available zircon (U-Th)/He around the eastern Himalaya syntaxis.
SAMPLE NO	Longitude	Latitude	Elevation (m)	Age (Ma)	Error	Reference
CD276	98.1401	29.6327	4197	37	0.3	This study
CD274	98.1814	29.5791	3894	51	2	This study
CD272	98.2099	29.5531	3622	60	5	This study
CD252	99.2993	27.3477	2878	117	7	This study
CD144	99.5151	27.0599	2595	121	2	Cao et al., 2020, GSA Bulletin
CD145	99.5034	27.0696	2635	108	5	Cao et al., 2020, GSA Bulletin
CD148	99.4927	27.1031	2939	119	7	Cao et al., 2020, GSA Bulletin
KC07-53	102.86	30.38	2400	13.75	1.63	Cook et al., 2013, Lithosphere
KC07-54	102.85	30.37	1740	14.83	1.44	Cook et al., 2013, Lithosphere
KC07-55	102.82	30.37	1175	17.26	0.65	Cook et al., 2013, Lithosphere
KC07-58	102.8	30.35	960	13.09	0.31	Cook et al., 2013, Lithosphere
KC07-56	102.76	30.42	1062	10.91	1.55	Cook et al., 2013, Lithosphere
KC07-57	102.88	30.58	1575	5.73	0.22	Cook et al., 2013, Lithosphere
KC05-10	102.84	30.51	1800	9.04	1.51	Cook et al., 2013, Lithosphere
D27	92.1678	31.9658	4944	115	11	Dai et al., 2013, JGS
D28	92.0669	31.7847	4765	86.1	8	Dai et al., 2013, JGS
D30	92.6819	31.7378	4480	54.2	7.5	Dai et al., 2013, JGS
D32	93.5553	31.8325	4450	74.3	11	Dai et al., 2013, JGS
D56	96.7975	33.7928	3938	103.6	6.5	Dai et al., 2013, JGS
D03	97.9653	33.0769	4195	146.5	10	Dai et al., 2013, JGS
SYX01	102.477	28.2646	1909	24.6	4.5	Deng et al., 2015, IJES
SYX03	102.503	28.2648	1952	37.7	10	Deng et al., 2015, IJES
SS26	102.715	28.9301	1376	35.21	1.8	Deng et al., 2015, IJES
SQM08	103.878	28.8934	494	21-228	1.1-11.4	Deng et al., 2015, IJES
SQM10	103.896	28.8973	583	132-178	6.6-8.9	Deng et al., 2015, IJES
SYX18	102.281	28.3052	2186	13.1	2.1	Deng et al., 2015, IJES
SYX17	102.284	28.3052	2356	16.7	0.6	Deng et al., 2015, IJES
SYX16	102.291	28.3054	2685	23.2	5.4	Deng et al., 2015, IJES
SYX14	102.292	28.3056	2749	8.5	0.4	Deng et al., 2015, IJES
SYX12	102.294	28.3068	2904	16.4	3.8	Deng et al., 2015, IJES
SYX11	102.228	28.2964	1673	11.1	0.6	Deng et al., 2015, IJES
SS15	102.841	29.1981	715	2.7-64	0.1-3.2	Deng et al., 2015, IJES
SS16	102.844	29.2078	850	275-1304	13.8-65.2	Deng et al., 2015, IJES
SS17	102.836	29.2274	867	27.9-1039	1.4-51.9	Deng et al., 2015, IJES
SS19	102.846	29.2309	1402	8.9	3.3?	Deng et al., 2015, IJES
SS20	102.84	29.2333	1139	2.9	2.7?	Deng et al., 2015, IJES
SS21	102.84	29.2363	1053	8.1	3.3?	Deng et al., 2015, IJES
SS04	103.46	29.2613	1265	15.4-64.9	0.8-3.2	Deng et al., 2015, IJES
SS02	103.455	29.2596	1166	15.8	2.7	Deng et al., 2015, IJES
SS06	103.464	29.263	1033	135-484	6.8-24.2	Deng et al., 2015, IJES
SS09	103.477	29.2627	791	25.9	6.9	Deng et al., 2015, IJES
SS01	103.487	29.2912	482	22.9	6.9	Deng et al., 2015, IJES
LM195	103.754	31.3268	1495	11.6	0.9	Godard et al., 2009, Tectonics
LM198	103.85	31.1308	811	193.9	15.5	Godard et al., 2009, Tectonics
LM208	104.032	31.3489	794	228.7	18.3	Godard et al., 2009, Tectonics
LM213	103.576	31.0264	762	466.1	37.3	Godard et al., 2009, Tectonics
LM223	103.605	31.3886	2474	14.6	1.2	Godard et al., 2009, Tectonics
LM225	103.589	31.3797	3185	15.8	1.3	Godard et al., 2009, Tectonics
LM226	103.591	31.3779	3060	24.1	1.9	Godard et al., 2009, Tectonics
LM227	103.595	31.3812	2806	24.4	2	Godard et al., 2009, Tectonics
LM228	103.597	31.4154	2232	8.7	0.7	Godard et al., 2009, Tectonics
LM229	103.576	31.4249	1731	25	2	Godard et al., 2009, Tectonics
LM231	103.517	31.3907	1295	10.1	0.8	Godard et al., 2009, Tectonics
LM234	103.487	31.2415	1130	17	1.4	Godard et al., 2009, Tectonics
LM235	103.477	31.1089	930	18.6	1.5	Godard et al., 2009, Tectonics
LM2196	103.598	31.4018	2190	7.8	0.6	Godard et al., 2009, Tectonics
LM256	103.492	31.4436	2330	13.7	1.1	Godard et al., 2009, Tectonics
W1425	103.526	31.4149	1439	8.4	0.7	Godard et al., 2009, Tectonics
W1848	103.499	31.4389	1860	6.6	0.5	Godard et al., 2009, Tectonics
W2093	103.504	31.4373	1956	8.9	0.7	Godard et al., 2009, Tectonics
W2130	103.502	31.4387	2130	11.1	0.9	Godard et al., 2009, Tectonics
SC062	103.898	31.351	1726	9.1	0.7	Godard et al., 2009, Tectonics
SC064	103.858	31.358	2061	19.8	1.6	Godard et al., 2009, Tectonics
SC065	103.854	31.3568	1927	13	1	Godard et al., 2009, Tectonics
SC067	103.888	31.3529	1807	12.4	1	Godard et al., 2009, Tectonics
SC074	103.537	31.201	1755	20.6	1.7	Godard et al., 2009, Tectonics
SC077	103.532	31.2014	1526	7.5	0.6	Godard et al., 2009, Tectonics
SC079	103.523	31.2045	1350	3.2	0.3	Godard et al., 2009, Tectonics
SC081	103.496	31.2067	1056	9.9	0.8	Godard et al., 2009, Tectonics
SC083	103.331	31.0709	1452	12.5	1	Godard et al., 2009, Tectonics
SC084	103.358	31.0558	1712	6.3	0.5	Godard et al., 2009, Tectonics
SC085	103.467	31.0697	939	60.7	4.9	Godard et al., 2009, Tectonics
S16X15	99.9398	28.99	3666	61.58	14.08	Gourbet et al., 2019, Lithoshere
S16X16	99.9347	28.9919	3595	66.77	9.288	Gourbet et al., 2019, Lithoshere
S16X17	99.9238	28.9952	3503	65.8	4.679	Gourbet et al., 2019, Lithoshere
S16X14	99.8393	28.9694	2829	146.18	8.322	Gourbet et al., 2019, Lithoshere
S16X08	99.9533	28.7984	3924	62.98	11.07	Gourbet et al., 2019, Lithoshere
S16X04	99.9402	28.7921	3818	49.48	3.879	Gourbet et al., 2019, Lithoshere
S16X03	99.9344	28.7952	3724	53.02	10.3	Gourbet et al., 2019, Lithoshere
S16X10	99.9204	28.691	3873	66.88	1.993	Gourbet et al., 2019, Lithoshere
S16X11	99.9193	28.6952	3727	63.01	4.738	Gourbet et al., 2019, Lithoshere
S16X09B	99.9155	28.7019	3621	58.73	6.21	Gourbet et al., 2019, Lithoshere
S16X12	99.9117	28.7017	3452	64.57	1.327	Gourbet et al., 2019, Lithoshere
S16X09	99.9076	28.7025	3378	60.06	1.963	Gourbet et al., 2019, Lithoshere
S16X13	99.9058	28.7065	3321	59.22	7.685	Gourbet et al., 2019, Lithoshere
S16X19	99.67482	28.5306	2790	94.52	34.82	Gourbet et al., 2019, Lithoshere
DC-23	90.9415	30.9944	4801	85.7	5.7	Haider et al., 2013, JAES
DC-41	90.9395	30.9366	4845	89.5	7.6	Haider et al., 2013, JAES
H-7	90.082	31.2753	5350	67.7	2.1	Haider et al., 2013, JAES
H-13	90.0153	31.3293	4714	84.4	6.9	Haider et al., 2013, JAES
H-16	89.9504	31.4844	4700	91	8	Haider et al., 2013, JAES
H-33	90.151	31.2879	5020	76.8	6.5	Haider et al., 2013, JAES
H-34	90.1428	31.2944	5001	73.3	6.8	Haider et al., 2013, JAES
H-35	90.1469	31.309	4926	69.3	4.8	Haider et al., 2013, JAES
H-72	90.5319	31.143	4603	77.5	4.4	Haider et al., 2013, JAES
H-87	90.3544	31.1861	4998	69.1	3.9	Haider et al., 2013, JAES
H-19	89.7781	31.2078	4830	61.8	2.8	Haider et al., 2013, JAES
H-20	89.7804	31.2208	5070	72.3	5.8	Haider et al., 2013, JAES
DC-29	89.5034	31.2889	4733	78.1	8.3	Haider et al., 2013, JAES
H-23	89.8048	31.4227	4630	77.1	7.9	Hetzel et al., 2011, Geology
H-24	89.8054	31.4434	4610	80.2	5	Hetzel et al., 2011, Geology
H-29	89.8982	31.4433	4970	75.1	6.6	Hetzel et al., 2011, Geology
H-30	89.8959	31.4685	4750	94.1	9.1	Hetzel et al., 2011, Geology
H-31	89.9194	31.4797	4770	66.7	3.2	Hetzel et al., 2011, Geology
DC-31	89.9208	31.4677	4824	85.1	4.7	Hetzel et al., 2011, Geology
DC-33	90.0143	31.3733	4733	74.8	1.7	Hetzel et al., 2011, Geology
97-4	102.927	32.157	2533	86.8	6.9	Kirby et al., 2002, Tectonics
97-6	102.344	32.675	3508	55	4.4	Kirby et al., 2002, Tectonics
93-4	103.486	31.2203	1118	11	0.9	Kirby et al., 2002, Tectonics
97-14	104.128	32.516	1421	4.7	0.4	Kirby et al., 2002, Tectonics
T12-28	91.32	29.822	5003	23.2	1.6	Li et al., 2016, G-cube
T12-33	92.188	30.098	4302	46.5	3.3	Li et al., 2016, G-cube
T12-36	92.025	29.981	4982	43.3	3	Li et al., 2016, G-cube
T12-40	92.01	30.003	4003	58	5	Li et al., 2016, G-cube
T12-42	91.91	29.981	3890	51.9	3.8	Li et al., 2016, G-cube
T13-15-3	91.267	29.683	4013	45.8	4	Li et al., 2016, G-cube
DQ11-01	98.9616	28.3796	4974	93	23	Liu-Zeng et al., 2018, EPSL
DQ11-03	98.9687	28.3728	4704	97	11	Liu-Zeng et al., 2018, EPSL
DQ11-04	98.972	28.3829	4529	111	2	Liu-Zeng et al., 2018, EPSL
DQ11-11	98.9263	28.3753	4248	93	13	Liu-Zeng et al., 2018, EPSL
DQ11-13	98.9176	28.3762	3960	103.9	6.7	Liu-Zeng et al., 2018, EPSL
DQ11-15	98.9091	28.3797	3660	85.1	7.3	Liu-Zeng et al., 2018, EPSL
DQ11-17	98.8995	28.3814	3360	78.6	9.5	Liu-Zeng et al., 2018, EPSL
DQ11-22	98.8196	28.4225	2873	16	13	Liu-Zeng et al., 2018, EPSL
DQ11-20	98.8203	28.4296	2494	7.9	1.2	Liu-Zeng et al., 2018, EPSL
WX11-01	99.3006	27.4254	3420	14.7	1.7	Liu-Zeng et al., 2018, EPSL
WX11-03	99.3031	27.4307	3150	121	29	Liu-Zeng et al., 2018, EPSL
WX11-07	99.3052	27.4351	2848	88	31	Liu-Zeng et al., 2018, EPSL
WX11-08	99.308	27.4478	2620	132	17	Liu-Zeng et al., 2018, EPSL
WX11-10	99.3327	27.4629	2439	115	19	Liu-Zeng et al., 2018, EPSL
WBO-04-15	99.0728	29.484	3100	33	14.3	Ouimet et al., 2010, Liothoshpere
WBO-04-13	99.0682	29.4798	2700	22.2	1	Ouimet et al., 2010, Liothoshpere
WBO-04-10	99.0612	29.4142	2350	46.3	20.2	Ouimet et al., 2010, Liothoshpere
WBO-04-41C	101.244	29.4602	4000	13.7	0.5	Ouimet et al., 2010, Liothoshpere
WBO-04-41A	101.24	29.4479	3700	11.7	0.7	Ouimet et al., 2010, Liothoshpere
WBO-04-41E	101.228	29.4203	2800	8.6	0.8	Ouimet et al., 2010, Liothoshpere
GZ76	100.154	29.394	4464	177	13	Tian et al., 2014a, JGR
GZ71	100.344	29.0195	4252	148	9.2	Tian et al., 2014a, JGR
GZ78	100.267	29.5138	4535	202	18	Tian et al., 2014a, JGR
HC1-9	102.65	33.46	-101	150.2	6.7	Tian et al., 2014b, G-cube
HC1-1	102.65	33.46	-469	165	7.5	Tian et al., 2014b, G-cube
HC1-2	102.65	33.46	-1951	140.2	6.8	Tian et al., 2014b, G-cube
HC1-5	102.65	33.46	-3845	102.8	7.4	Tian et al., 2014b, G-cube
HC1-6	102.65	33.46	-4348	76.3	8.5	Tian et al., 2014b, G-cube
HC1-8	102.65	33.46	-7013	13.7	4.2	Tian et al., 2014b, G-cube
HS81	104.422	32.466	972	115.2	6.1	Tian et al., 2018, Tectonics
HS84	104.123	32.571	1523	11.4	0.5	Tian et al., 2018, Tectonics
HS85	103.964	32.751	2513	5.1	0.4	Tian et al., 2018, Tectonics
HS86	103.898	32.778	2896	84.7	6.4	Tian et al., 2018, Tectonics
LB12-MZ07	92.149	29.7038	4347	13.39	1.95	Tremblay et al., 2015, PNAS
LB12-MZ08	92.1448	29.7011	4526	18.09	1.49	Tremblay et al., 2015, PNAS
LB12-MZ09	92.1409	29.6945	4746	17.28	1.79	Tremblay et al., 2015, PNAS
LB12-MZ10	92.137	29.6904	4987	21.69	3.16	Tremblay et al., 2015, PNAS
LB12-MZ11	92.1369	29.6834	5175	23.94	4.67	Tremblay et al., 2015, PNAS
LB12-MZ12	92.1436	29.6773	5478	40.66	3.23	Tremblay et al., 2015, PNAS
LMW-01	103.636	31.3833	4174	51.5	3.4	Wang et al., 2012, Nat. Geosci.
LMW-07	103.662	31.4309	1908	25.5	5.3	Wang et al., 2012, Nat. Geosci.
LME-09	103.648	31.2907	2900	37.4	5	Wang et al., 2012, Nat. Geosci.
LME-11	103.653	31.2874	2500	33.5	1.7	Wang et al., 2012, Nat. Geosci.
LME-13	103.654	31.2853	2100	33.9	3.6	Wang et al., 2012, Nat. Geosci.
LME-15	103.66	31.283	1800	31.7	4.7	Wang et al., 2012, Nat. Geosci.
LME-16	103.652	31.2676	1550	23.9	3.1	Wang et al., 2012, Nat. Geosci.
LME-17	103.647	31.2289	1430	22.5	3.2	Wang et al., 2012, Nat. Geosci.
LME-18	103.644	31.2165	1390	197	46.8	Wang et al., 2012, Nat. Geosci.
LME-20	103.669	31.1607	1160	108.7	14.1	Wang et al., 2012, Nat. Geosci.
MK09	98.617	29.1103	2543	15.5	0.9	Yang et al., 2016, EPSL
NJ1	98.871	26.2652	967	7.9	0.7	Yang et al., 2016, EPSL
NJ2	98.8629	26.2995	998	6.3	0.4	Yang et al., 2016, EPSL
NJ3	98.8999	26.5246	1072	6.2	0.5	Yang et al., 2016, EPSL
NJ4	98.8509	26.9252	1804	6.1	0.7	Yang et al., 2016, EPSL
NJ5	98.8567	26.9265	1620	5.3	0.1	Yang et al., 2016, EPSL
NJ8	98.8619	26.909	1247	6.8	0.3	Yang et al., 2016, EPSL
NJ9	98.8594	27.1284	1504	4.7	0.2	Yang et al., 2016, EPSL
NJ10	98.8573	27.1287	1418	5.2	0.2	Yang et al., 2016, EPSL
NJ12	98.8271	27.4077	1340	4.4	0.6	Yang et al., 2016, EPSL
NJ19	98.6364	27.9653	1726	7	0.6	Yang et al., 2016, EPSL
NJ20	98.6534	27.7724	1656	3.4	0.1	Yang et al., 2016, EPSL
NJ21	98.6159	27.7535	1674	3.4	0.1	Yang et al., 2016, EPSL
LCJ19	99.3628	26.4755	2482	125.7	35.4	Yang et al., 2016, EPSL
LCJ6	99.3497	26.9793	2131	6.3	0.5	Yang et al., 2016, EPSL
LCJ9	99.0069	27.6334	1761	6.1	0.3	Yang et al., 2016, EPSL
LCJ10	98.9264	27.9387	1850	5.5	0.5	Yang et al., 2016, EPSL
LCJ17	98.9262	28.4429	3502	112.9	4.2	Yang et al., 2016, EPSL
MK01	98.9054	28.4128	2953	90.7	7.1	Yang et al., 2016, EPSL
MK04	98.8592	28.2648	2066	7.6	0.5	Yang et al., 2016, EPSL
MK08	98.9042	28.3916	3030	84.3	1	Yang et al., 2016, EPSL
MK12	98.4255	29.7164	3529	156	11.3	Yang et al., 2016, EPSL
YAN08	99.3472	27.4737	2356	130.6	8.3	Yang et al., 2016, EPSL
BC-02-02	96.365	29.6144	3440	25.9	1.1	Zeitler et al., 2014, GSASP
BC-03-05	96.7281	29.6787	4434	52.9	2.8	Zeitler et al., 2014, GSASP
CL-03-05	96.1564	30.7899	3761	32.9	2.3	Zeitler et al., 2014, GSASP
CL-04-05	95.5963	30.7829	3635	81.1	4.7	Zeitler et al., 2014, GSASP
CL-06-05	94.9819	30.7698	4208	46.7	2.7	Zeitler et al., 2014, GSASP
BM-06-05	95.7507	30.3507	4359	35	1.8	Zeitler et al., 2014, GSASP
BM-01-05	95.7666	30.1852	3054	10.4	0.5	Zeitler et al., 2014, GSASP
BT-34-02	94.9441	30.1697	2241	2.05	0.07	Zeitler et al., 2014, GSASP
BL-03-03	93.6245	30.133	3432	13.1	0.7	Zeitler et al., 2014, GSASP
BT-18-01	95.0596	30.0937	2109	0.35	0.01	Zeitler et al., 2014, GSASP
NBK-68-26	94.6315	30.0273	3068	4.08	0.2	Zeitler et al., 2014, GSASP
BT-03-02	94.9924	30.0145	2069	0.56	0.02	Zeitler et al., 2014, GSASP
BT-24-02	95.302	30.0009	2720	0.67	0.03	Zeitler et al., 2014, GSASP
NB02-35	94.7204	29.996	2720	1.73	0.08	Zeitler et al., 2014, GSASP
BT-07-02	94.8116	29.9542	2485	1.47	0.04	Zeitler et al., 2014, GSASP
BT-23-02	95.3845	29.9541	2600	1.46	0.09	Zeitler et al., 2014, GSASP
b-289	95.0891	29.9459	1990	0.89	0.04	Zeitler et al., 2014, GSASP
BT-31-02	95.3921	29.9295	2702	2.89	0.1	Zeitler et al., 2014, GSASP
BT-29-02	95.392	29.9293	2750	1.64	0.07	Zeitler et al., 2014, GSASP
GP-14-03	94.8839	29.9235	3600	0.83	0.03	Zeitler et al., 2014, GSASP
GP-09-03	94.8959	29.9108	3610	0.71	0.04	Zeitler et al., 2014, GSASP
NB-59-26	95.6167	29.9059	2731	5.3	0.16	Zeitler et al., 2014, GSASP
NB-63-26	95.4916	29.8915	2637	2.26	0.09	Zeitler et al., 2014, GSASP
b-279	95.1467	29.8901	1530	0.22	0.01	Zeitler et al., 2014, GSASP
BC-01-05	95.5685	29.8888	2695	7.42	0.52	Zeitler et al., 2014, GSASP
BT-17-02	94.7665	29.8368	3180	1.92	0.06	Zeitler et al., 2014, GSASP
BT-12-02	94.7715	29.8348	3287	4.66	0.16	Zeitler et al., 2014, GSASP
BT-20-02	94.7867	29.8276	3567	1.25	0.04	Zeitler et al., 2014, GSASP
b-188	95.405	29.8142	3290	2.08	0.09	Zeitler et al., 2014, GSASP
BM-02-02	95.6976	29.8093	3646	8.94	0.33	Zeitler et al., 2014, GSASP
NB02-120	94.4212	29.8012	4080	13.9	0.3	Zeitler et al., 2014, GSASP
BC-03-02	95.9157	29.7836	2968	12	1.4	Zeitler et al., 2014, GSASP
b-265	95.2975	29.7783	1470	0.56	0.03	Zeitler et al., 2014, GSASP
b-254	95.2085	29.7663	3598	0.5	0.03	Zeitler et al., 2014, GSASP
BM-03-02	95.6852	29.7648	4286	10.2	0.4	Zeitler et al., 2014, GSASP
b-247	95.1584	29.7581	2748	0.72	0.02	Zeitler et al., 2014, GSASP
b-232	94.9599	29.7547	2713	0.27	0.01	Zeitler et al., 2014, GSASP
BT-20E-02	94.1842	29.7522	3090	13.2	0.4	Zeitler et al., 2014, GSASP
NBK-83b-25	94.7917	29.7486	4157	1.28	0.04	Zeitler et al., 2014, GSASP
b-237	95.0652	29.7424	2767	0.38	0.01	Zeitler et al., 2014, GSASP
NB02-159	94.7183	29.7318	3380	5.31	0.16	Zeitler et al., 2014, GSASP
BT-37-02	92.0396	29.7167	4146	39.3	1.5	Zeitler et al., 2014, GSASP
BL-01-03	94.3887	29.6901	3224	9.92	0.34	Zeitler et al., 2014, GSASP
BT-03-05	94.6013	29.6457	4677	9.18	0.32	Zeitler et al., 2014, GSASP
IG-6b-01	94.9268	29.6319	2984	1.15	0.04	Zeitler et al., 2014, GSASP
BT-09-01	94.7106	29.6318	4179	5.63	0.26	Zeitler et al., 2014, GSASP
b-141	95.4006	29.6224	1990	0.57	0.06	Zeitler et al., 2014, GSASP
BT-08-02	94.7175	29.6106	3811	4.45	0.17	Zeitler et al., 2014, GSASP
BT-02-05	94.5755	29.5663	3911	8.56	0.29	Zeitler et al., 2014, GSASP
b-115	95.4137	29.5637	1900	1.06	0.04	Zeitler et al., 2014, GSASP
IG-15a-01	94.8926	29.5398	3113	1.33	0.04	Zeitler et al., 2014, GSASP
BL-09-03	94.4297	29.5271	2954	9.39	0.57	Zeitler et al., 2014, GSASP
BL-06-03	94.2598	29.5043	3877	9.94	0.42	Zeitler et al., 2014, GSASP
BL-05-03	94.2217	29.5037	4258	8.51	0.34	Zeitler et al., 2014, GSASP
BL-07-03	94.2752	29.5032	3738	9.01	0.47	Zeitler et al., 2014, GSASP
BL-08-03	94.3164	29.4912	3285	8.49	0.5	Zeitler et al., 2014, GSASP
BT-21E-02	94.5649	29.489	2940	5.49	0.27	Zeitler et al., 2014, GSASP
IG-16-01	94.9466	29.4875	4227	1.48	0.06	Zeitler et al., 2014, GSASP
IG-19-01	94.8328	29.4807	3057	2.48	0.09	Zeitler et al., 2014, GSASP
IG-20b-01	94.7627	29.4683	3097	2.76	0.11	Zeitler et al., 2014, GSASP
BT-01-01	94.6493	29.4671	2931	3.52	0.15	Zeitler et al., 2014, GSASP
NB02-102	94.4266	29.4586	2960	6.92	0.39	Zeitler et al., 2014, GSASP
NB-40-26	94.2628	29.3715	3703	6.34	0.23	Zeitler et al., 2014, GSASP
NBK-13-23	94.4147	29.3389	2964	5.67	0.22	Zeitler et al., 2014, GSASP
b-35	95.3452	29.3199	1059	12.1	1.4	Zeitler et al., 2014, GSASP
NB-24-26	94.5264	29.2467	3629	5.96	0.25	Zeitler et al., 2014, GSASP
NB-19-26	94.2907	29.2233	3100	5.96	0.24	Zeitler et al., 2014, GSASP
NB-08-26	93.9445	29.1801	3068	8.78	0.34	Zeitler et al., 2014, GSASP
NB-13-26	94.248	29.1205	3173	5.75	0.26	Zeitler et al., 2014, GSASP
NB-12-26	94.2196	29.0868	3132	6.36	0.32	Zeitler et al., 2014, GSASP
NB-11-26	94.2353	29.045	3163	6.45	0.33	Zeitler et al., 2014, GSASP
SB 13	94.9223	29.0575	584	9.74	1.13	Zeitler et al., 2014, GSASP
SB 10	94.7481	28.8549	482	5.34	0.62	Zeitler et al., 2014, GSASP
SB 02	95.0904	28.4673	464	7.71	4.68	Zeitler et al., 2014, GSASP
MEO12-01	101.376	30.032	4283	139.8	28.2	Zhang et al., 2016, EPSL
MEO12-02	101.396	30.016	4274	129.2	49.6	Zhang et al., 2016, EPSL
MEO12-04	101.569	29.888	3480	103.8	5.8	Zhang et al., 2016, EPSL
MEO12-10	101.424	29.224	3666	30.2	1.5	Zhang et al., 2016, EPSL
MEO12-11	101.42	29.226	3863	33.2	1.7	Zhang et al., 2016, EPSL
MEO12-12	101.417	29.227	4013	29.4	2.8	Zhang et al., 2016, EPSL
MEO12-13	101.415	29.227	4153	58.2	19.2	Zhang et al., 2016, EPSL
MEO12-15	101.412	29.218	4445	33.3	8.5	Zhang et al., 2016, EPSL
MEO12-16	101.408	29.217	4602	31.8	1.9	Zhang et al., 2016, EPSL
MEO12-17	101.408	29.214	4800	32.9	2.8	Zhang et al., 2016, EPSL

## Sheet: ZFT
Dataset S5D. A collection of available zircon fission track data around the eastern Himalaya syntaxis.
Sample NO	Longitude	Latitude	Elevation (m)	Age (Ma)	Error	Reference
FT-1	103.19	31.76	3950	68	8	Arne et al., 1997, Tectonophysics
FT-4	103.19	31.76	2750	49	14	Arne et al., 1997, Tectonophysics
FT-5	103.12	31.66	2400	38	4	Arne et al., 1997, Tectonophysics
FT-7	103.42	31.06	950	110	14	Arne et al., 1997, Tectonophysics
KC07-55	102.82	30.37	1175	14.2	0.8	Cook et al., 2013, Lithosphere
KC07-56	102.76	30.42	1062	10.9	0.7	Cook et al., 2013, Lithosphere
KC07-57	102.88	30.58	1575	13.4	0.7	Cook et al., 2013, Lithosphere
KC05-10	102.84	30.51	1800	13.6	1.3	Cook et al., 2013, Lithosphere
KC05-13	102.89	30.56	1490	11.9	1.3	Cook et al., 2013, Lithosphere
B2-063 (z)	102.79	30.4	1088	74	5	Li et al., 2012, JAES
B4-065 (z)	102.8	30.32	924	303	22	Li et al., 2012, JAES
Sss29 (z)	102.66	30.06	888	273	19	Li et al., 2012, JAES
Sss32 (z)	102.47	29.95	1251	194	14	Li et al., 2012, JAES
09T01-1	90.7149	31.2867	4667	99.3	5.2	Shen T.Y., PhD thesis, 2016
09T02-1	89.9289	31.4881	4700	92.7	4.5	Shen T.Y., PhD thesis, 2016
09T03-1	89.8399	31.4825	4741	99.9	5.1	Shen T.Y., PhD thesis, 2016
09T07-1	89.1557	32.0326	4564	139.9	8.7	Shen T.Y., PhD thesis, 2016
09T17-1	89.1018	32.3163	4765	166.5	11.7	Shen T.Y., PhD thesis, 2016
09T20-1	90.0541	32.4165	4732	92.6	5.9	Shen T.Y., PhD thesis, 2016
13T01	81.5839	31.0803	5447	19.1	0.9	Shen T.Y., PhD thesis, 2016
13T02	81.5816	31.0792	5317.5	19.6	1	Shen T.Y., PhD thesis, 2016
13T04	81.5382	31.0456	5044	21.7	1.3	Shen T.Y., PhD thesis, 2016
14T01	82.0507	30.8348	5492.5	22.7	1	Shen T.Y., PhD thesis, 2016
14T03	82.0281	30.8305	5291.6	24.1	1.6	Shen T.Y., PhD thesis, 2016
14T05	82.0014	30.8239	5103.5	21.5	1	Shen T.Y., PhD thesis, 2016
14T09	82.6882	30.6193	5140	21.2	1.1	Shen T.Y., PhD thesis, 2016
14T11	86.2263	29.5595	4935	25.9	1.4	Shen T.Y., PhD thesis, 2016
14T20	92.4103	29.2739	4191	21.4	1.3	Shen T.Y., PhD thesis, 2016
14T21	92.4118	29.2735	4058	21.6	1.3	Shen T.Y., PhD thesis, 2016
14T22	92.4138	29.2715	3912	17.7	1	Shen T.Y., PhD thesis, 2016
14T24	92.4131	29.2639	3660	19.7	0.9	Shen T.Y., PhD thesis, 2016
14T18	92.4169	29.2612	3477	25	1.1	Shen T.Y., PhD thesis, 2016
14T26	92.3994	29.255	3376	21	1.1	Shen T.Y., PhD thesis, 2016
BO-1	102.752	30.4136	1604	13.2	1	Tan et al., 2014, JAES
BO-2	102.77	30.4066	2286	80.6	8.5	Tan et al., 2014, JAES
BO-3	102.899	30.5547	1557	13.2	1.1	Tan et al., 2014, JAES
BX-5	102.733	30.8313	2798	108	9.1	Tan et al., 2014, JAES
BX-9	102.79	30.6423	1955	108	0.9	Tan et al., 2014, JAES
BX-11	102.868	30.6031	2154	25.4	2.4	Tan et al., 2014, JAES
BX-13	102.913	30.5289	1416	27.7	2	Tan et al., 2014, JAES
BX-14	102.859	30.4477	1254	43.6	5.5	Tan et al., 2014, JAES
BX-16	102.838	30.2317	804	107.6	7.3	Tan et al., 2014, JAES
BX110906	102.861	30.2063	1204	199.3	11.4	Tan et al., 2014, JAES
BX110907	102.84	30.2248	770	129.2	8.8	Tan et al., 2014, JAES
BX110913	102.727	30.4191	1378	28.5	1.4	Tan et al., 2014, JAES
GD-1	103.406	31.0614	1219	76.4	5.7	Tan et al., 2014, JAES
GD-2	103.338	31.0628	1451	64.7	8.4	Tan et al., 2014, JAES
GD-3	102.986	30.8824	2690	71.3	9.3	Tan et al., 2014, JAES
GD-6	102.972	30.8881	3460	75.7	7.8	Tan et al., 2014, JAES
GD-10	102.894	30.9106	4389	81.9	7.8	Tan et al., 2014, JAES
GD-11	102.864	30.9774	3608	63.3	5.9	Tan et al., 2014, JAES
DB-1	102.176	30.0403	1430	135.5	9.7	Tan et al., 2014, JAES
DB-2	102.202	30.2154	1679	82.2	6.1	Tan et al., 2014, JAES
WCH-1	103.399	31.3274	1766	10.6	0.9	Tan et al., 2014, JAES
Gong-41	102.176	30.0403	1488	90.2	5.2	Tan et al., 2014, JAES
Gong-78	102.729	30.788	2444	195	11.6	Tan et al., 2014, JAES
Gong-83	102.785	30.3143	956	33	2.5	Tan et al., 2014, JAES
Gong-85	102.751	30.6887	2133	31.6	2.2	Tan et al., 2014, JAES
Gong-90	102.887	30.5572	1513	9.6	0.7	Tan et al., 2014, JAES
Gong-91	102.915	30.5256	1462	25.1	1.4	Tan et al., 2014, JAES
Gong-92	102.915	30.512	1366	25.6	1.7	Tan et al., 2014, JAES
Gong-95	102.836	30.4093	1066	56.3	3.6	Tan et al., 2014, JAES
Kc0510*	102.84	30.5059	2045	13.6	1.3	Tan et al., 2014, JAES
Kc0755*	102.821	30.372	1233	14.2	0.8	Tan et al., 2014, JAES
Kc0513*	102.893	30.558	2352	11.9	1.3	Tan et al., 2014, JAES
Kc0756*	102.762	30.419	1180	10.9	0.7	Tan et al., 2014, JAES
Kc0757*	102.879	30.5787	1575	13.4	0.7	Tan et al., 2014, JAES
Bo-6	102.057	30.997	2133	22.1	1.3	Tan et al., 2017, Lithosphere
Bo-8	102.085	31.006	2142	52.7	3	Tan et al., 2017, Lithosphere
Bo-9	102.07	31.006	2137	20.8	1.4	Tan et al., 2017, Lithosphere
Bo-11	101.868	31.023	1985	12.8	0.6	Tan et al., 2017, Lithosphere
Bo-13	101.837	31.027	2333	10.8	0.6	Tan et al., 2017, Lithosphere
Bo-18	101.8	30.828	2060	12.3	0.7	Tan et al., 2017, Lithosphere
Db-12	102.023	30.725	1790	10.2	0.8	Tan et al., 2017, Lithosphere
Db-15	101.729	30.777	2231	11.8	0.6	Tan et al., 2017, Lithosphere
Db-17	101.737	30.744	2466	6.7	0.5	Tan et al., 2017, Lithosphere
Ki-4	102.074	31.009	2142	37.8	1.9	Tan et al., 2017, Lithosphere
Ki-7	101.975	30.944	2076	11.5	0.6	Tan et al., 2017, Lithosphere
Ki-9	101.917	30.892	2000	8.2	0.5	Tan et al., 2017, Lithosphere
Ki-10	101.882	31.125	2012	20.6	1	Tan et al., 2017, Lithosphere
Ki-12	101.873	31.175	3190	22	1	Tan et al., 2017, Lithosphere
Ki-14	101.868	31.03	1991	13.4	0.7	Tan et al., 2017, Lithosphere
Kc-518	101.941	30.807	1843	12.8	0.8	Tan et al., 2017, Lithosphere
Kc-533	101.965	30.791	1814	7.7	0.6	Tan et al., 2017, Lithosphere
114*	101.903	31.153	2240	23.7	1.3	Tan et al., 2017, Lithosphere
116*	102.241	31.0283	2800	202.1	3.9	Tan et al., 2017, Lithosphere
AJX12-1	86.3223	29.5474	5179	50.9	2.6	Wang, et al., 2015, Sci. Rep.
GDS12-1	82.0557	30.8495	5762	26.2	4.2	Wang, et al., 2015, Sci. Rep.
LMW-01	103.636	31.3833	4174	242.4	19.7	Wang et al., 2012, Nat. Geosci.
LMW-05	103.653	31.4128	3385	297.1	15.6	Wang et al., 2012, Nat. Geosci.
LMW-07	103.662	31.4309	1908	174.6	10.8	Wang et al., 2012, Nat. Geosci.
LME-11	103.653	31.2874	2500	263.1	17.6	Wang et al., 2012, Nat. Geosci.
LME-17	103.647	31.2289	1430	194.8	13.2	Wang et al., 2012, Nat. Geosci.
LME-18	103.644	31.2165	1390	197	23.4	Wang et al., 2012, Nat. Geosci.
LME-20	103.669	31.1607	1160	369.6	21.4	Wang et al., 2012, Nat. Geosci.
79	101.03	30.767	2830	163.7	17	Xu and Kamp, 2000, JGR
1	101.542	30.04	3480	162.6	10.6	Xu and Kamp, 2000, JGR
83	101.263	30.833	3525	265.7	17.1	Xu and Kamp, 2000, JGR
60	100.377	31.547	3430	181	13.1	Xu and Kamp, 2000, JGR
61	100.382	31.552	3420	210.9	17	Xu and Kamp, 2000, JGR
75	100.663	31.372	3500	134.7	4.6	Xu and Kamp, 2000, JGR
73	100.66	31.348	3630	130.1	3.8	Xu and Kamp, 2000, JGR
77	100.667	31.377	3440	121.8	3.6	Xu and Kamp, 2000, JGR
76	100.665	31.375	3400	133.3	2.5	Xu and Kamp, 2000, JGR
62	100.383	31.562	3400	230.8	24.5	Xu and Kamp, 2000, JGR
64	100.393	31.565	3360	239.6	18.9	Xu and Kamp, 2000, JGR
65	100.397	31.567	3350	274.2	14.2	Xu and Kamp, 2000, JGR
74	100.667	31.367	3520	131.8	5.4	Xu and Kamp, 2000, JGR
66	100.593	31.433	3240	275.1	20.9	Xu and Kamp, 2000, JGR
67	100.617	31.417	3235	262.9	22.8	Xu and Kamp, 2000, JGR
68	100.68	31.442	3200	171	17	Xu and Kamp, 2000, JGR
71	100.655	31.345	3660	126	5	Xu and Kamp, 2000, JGR
88	101.11	30.997	2980	140.2	17.5	Xu and Kamp, 2000, JGR
69	100.683	31.45	3200	150.5	4.5	Xu and Kamp, 2000, JGR
72	100.658	31.347	3645	134.8	2.3	Xu and Kamp, 2000, JGR
70	100.697	31.483	3210	142.8	5.2	Xu and Kamp, 2000, JGR
89	101.113	30.993	2990	135.2	16.9	Xu and Kamp, 2000, JGR
90	101.117	30.995	3000	130.7	8.3	Xu and Kamp, 2000, JGR
82	101.128	30.958	2930	135.7	13	Xu and Kamp, 2000, JGR
91	101.117	31	3100	134.1	9	Xu and Kamp, 2000, JGR
92	101.16	31.01	3640	151.3	6.5	Xu and Kamp, 2000, JGR
97	101.25	30.825	3730	103.9	3	Xu and Kamp, 2000, JGR
98	101.251	30.826	3730	105.1	2.9	Xu and Kamp, 2000, JGR
48	101.505	30.257	3830	108.5	13	Xu and Kamp, 2000, JGR
93	101.235	31.023	4540	150.2	8.1	Xu and Kamp, 2000, JGR
99	101.254	30.828	3720	107.6	3.8	Xu and Kamp, 2000, JGR
100	101.257	30.831	3665	107.5	3.7	Xu and Kamp, 2000, JGR
102	100.41	31.48	2915	5.7	0.4	Xu and Kamp, 2000, JGR
49	101.505	30.257	3825	130.1	4.3	Xu and Kamp, 2000, JGR
95	101.008	31.008	3920	138.3	4.3	Xu and Kamp, 2000, JGR
96	101.006	31.003	4040	132.1	14.2	Xu and Kamp, 2000, JGR
101	101.258	30.833	3660	98.8	11.9	Xu and Kamp, 2000, JGR
105	102.2	29.94	1368	74	12.3	Xu and Kamp, 2000, JGR
50	101.505	30.257	3805	126.1	5.2	Xu and Kamp, 2000, JGR
51	101.507	30.255	3785	132	4.7	Xu and Kamp, 2000, JGR
52	101.507	30.25	3730	131.6	3.4	Xu and Kamp, 2000, JGR
53	101.508	30.245	3585	129.4	4.5	Xu and Kamp, 2000, JGR
94	101.238	31.027	4560	167.6	14.7	Xu and Kamp, 2000, JGR
54	101.508	30.246	3590	120	4.5	Xu and Kamp, 2000, JGR
55	101.533	30.283	3760	122.3	4.4	Xu and Kamp, 2000, JGR
56	101.517	30.253	3560	114.3	3.2	Xu and Kamp, 2000, JGR
114	101.903	31.153	2240	23.7	1.3	Xu and Kamp, 2000, JGR
116	102.242	31.028	2800	202.1	33.9	Xu and Kamp, 2000, JGR
2	101.806	30.0759	4290	7.1	0.6	Xu and Kamp, 2000, JGR
3	101.888	29.9933	3200	5.4	0.6	Xu and Kamp, 2000, JGR
4	101.901	29.9895	3112	4.7	0.4	Xu and Kamp, 2000, JGR
5	101.911	29.9891	3062	5.4	0.8	Xu and Kamp, 2000, JGR
6	101.929	29.9858	3004	3.7	0.3	Xu and Kamp, 2000, JGR
7	101.936	29.989	2983	3	0.2	Xu and Kamp, 2000, JGR
8	101.939	29.9931	2983	4	0.2	Xu and Kamp, 2000, JGR
9	101.948	30.0007	2870	7.3	0.4	Xu and Kamp, 2000, JGR
10	101.947	29.9999	2868	2.8	0.2	Xu and Kamp, 2000, JGR
11	101.952	30.0099	2806	5.3	0.3	Xu and Kamp, 2000, JGR
12	101.951	30.0137	2795	3.2	0.3	Xu and Kamp, 2000, JGR
13	101.981	30.0575	2503	25.1	1.2	Xu and Kamp, 2000, JGR
14	101.983	30.0576	2485	19.9	1.4	Xu and Kamp, 2000, JGR
15	101.993	30.0597	2450	21	1.4	Xu and Kamp, 2000, JGR
16	102.015	30.0777	2330	22.4	2.1	Xu and Kamp, 2000, JGR
17	102.023	30.0844	2260	18.6	1.4	Xu and Kamp, 2000, JGR
18	102.024	30.0847	2257	16.8	1.5	Xu and Kamp, 2000, JGR
19	102.034	30.0915	2182	18.2	0.8	Xu and Kamp, 2000, JGR
20	102.063	30.0859	2030	20.5	1.5	Xu and Kamp, 2000, JGR
21	102.064	30.0853	2020	17.4	1.6	Xu and Kamp, 2000, JGR
22	102.013	29.7	2345	4.2	0.3	Xu and Kamp, 2000, JGR
23	102.015	29.7	2340	22	0.1	Xu and Kamp, 2000, JGR
24	102.016	29.708	2320	1.9	0.1	Xu and Kamp, 2000, JGR
25	102.017	29.717	2288	2.4	0.3	Xu and Kamp, 2000, JGR
26	102.025	29.725	2280	2.3	0.2	Xu and Kamp, 2000, JGR
27	102.033	29.733	2280	3	0.1	Xu and Kamp, 2000, JGR
28	102.038	29.7	2110	2.2	0.2	Xu and Kamp, 2000, JGR
30	102.042	29.7	2110	2	0.2	Xu and Kamp, 2000, JGR
31	102.035	29.695	2120	14	3	Xu and Kamp, 2000, JGR
32	102.047	29.695	2120	19.4	5.1	Xu and Kamp, 2000, JGR
34	102.142	29.633	1380	10.7	2.8	Xu and Kamp, 2000, JGR
35	102.143	29.625	1380	23.7	7.8	Xu and Kamp, 2000, JGR
36	102.143	29.62	1365	35.1	8.7	Xu and Kamp, 2000, JGR
37	102.143	29.617	1382	29.8	1.5	Xu and Kamp, 2000, JGR
38	102.143	29.533	1210	30.4	26.2	Xu and Kamp, 2000, JGR
39	102.145	29.533	1154	26.9	2.2	Xu and Kamp, 2000, JGR
40	102.15	29.533	1125	32.8	4.7	Xu and Kamp, 2000, JGR
41	102.158	29.533	1084	44.2	2.4	Xu and Kamp, 2000, JGR
42	102.162	29.533	1070	53.4	3.6	Xu and Kamp, 2000, JGR
43	102.167	29.533	1082	37.2	1.6	Xu and Kamp, 2000, JGR
47	102.18	29.483	1002	58.1	11.1	Xu and Kamp, 2000, JGR
57	101.617	30.548	3480	8.7	0.6	Xu and Kamp, 2000, JGR
58	101.643	30.567	3280	7.9	0.5	Xu and Kamp, 2000, JGR
59	101.65	30.578	3000	7.8	0.5	Xu and Kamp, 2000, JGR
107	102.215	29.94	1346	12.9	1.1	Xu and Kamp, 2000, JGR
108	102.22	29.95	1351	10.8	0.9	Xu and Kamp, 2000, JGR
109	102.225	29.96	1392	80.6	7.8	Xu and Kamp, 2000, JGR
113	102.26	29.98	2608	263.4	18.8	Xu and Kamp, 2000, JGR
115	102.671	30.597	2880	11.9	1.3	Xu and Kamp, 2000, JGR
117	102.693	30.98	2720	211.3	16.5	Xu and Kamp, 2000, JGR
118	102.883	30.962	3800	196.2	9	Xu and Kamp, 2000, JGR
119	102.9	30.913	4487	213.6	14.5	Xu and Kamp, 2000, JGR
SGLS-1	91.876	32.0156		54.1	2	Yang et al., 1999, Rad. Meas.
KL-1	91.3455	30.631		52.7	2.6	Yang et al., 1999, Rad. Meas.
YBJ-1	90.6225	30.0349		35.6	1.8	Yang et al., 1999, Rad. Meas.
KLG-1	91.0404	29.8221		53.1	2.8	Yang et al., 1999, Rad. Meas.
LS-1	91.1602	29.7212		57	1.8	Yang et al., 1999, Rad. Meas.
QS-1	90.7757	29.5998		40.3	1.8	Yang et al., 1999, Rad. Meas.
QS-2	90.7757	29.5998		36.5	2.3	Yang et al., 1999, Rad. Meas.
NM-1	90.3898	29.5853		44.5	1.9	Yang et al., 1999, Rad. Meas.
DZK-1	89.9357	29.5853		48.4	2.1	Yang et al., 1999, Rad. Meas.
LL1-2	90.4	28.985	4510	42.9	5.5	Yuan et al., 2002, Chinese Sci. Bull.
LL5-2	90.3933	29.0917	4470	93.7	7.1	Yuan et al., 2002, Chinese Sci. Bull.
LL12	90.6867	29.235	4060	53.5	2.7	Yuan et al., 2002, Chinese Sci. Bull.
NGL3	91.8067	29.2533	3690	60.4	6.3	Yuan et al., 2002, Chinese Sci. Bull.
CD46	99.981	30.181	4260	100	11.5	Zhang et al., 2017, EPSL
G16	101.52	30.26	3572	93	5.7	Zhang et al., 2017, EPSL
CD14-4	101.83	30.05	3880	6.6	0.3	Zhang et al., 2017, EPSL
CD17	101.87	30	3456	4.8	0.5	Zhang et al., 2017, EPSL
CD18	101.81	30.08	4270	6.2	0.5	Zhang et al., 2017, EPSL
CD19	101.81	30.09	4680	7.5	0.7	Zhang et al., 2017, EPSL
G11	101.75	30.19	4302	7.6	0.4	Zhang et al., 2017, EPSL
G13	101.78	30.25	3835	5.3	0.2	Zhang et al., 2017, EPSL
G14	101.78	30.26	3738	3.3	0.2	Zhang et al., 2017, EPSL
G15	101.81	30.26	3514	2.8	0.2	Zhang et al., 2017, EPSL
G18	101.7	30.45	4434	4.5	0.2	Zhang et al., 2017, EPSL
G21	101.62	30.54	3432	4.2	0.3	Zhang et al., 2017, EPSL
G26	101.65	30.58	3102	4	0.3	Zhang et al., 2017, EPSL
A58	101.86	26.72	1020	154	9.3	Zhang Y.Z. , PhD thesis, 2015
A60	101.91	26.72	1030	160	10.9	Zhang Y.Z. , PhD thesis, 2015
A62	102.08	26.84	1080	102	4.6	Zhang Y.Z. , PhD thesis, 2015
A63	102.14	28.06	1570	169	11.6	Zhang Y.Z. , PhD thesis, 2015
A65	102.05	28.09	1710	98	6.1	Zhang Y.Z. , PhD thesis, 2015
A67	102	28.11	2040	36	2.3	Zhang Y.Z. , PhD thesis, 2015
A69	102	28.37	2360	56	2.3	Zhang Y.Z. , PhD thesis, 2015
A71	101.94	28.33	2080	19	0.9	Zhang Y.Z. , PhD thesis, 2015
A78	101.74	28.53	1570	32	1.7	Zhang Y.Z. , PhD thesis, 2015
A83	102.34	29.07	1510	18	1.2	Zhang Y.Z. , PhD thesis, 2015
A84	102.34	29.1	1350	20	1.3	Zhang Y.Z. , PhD thesis, 2015
A85	102.36	29.14	1200	19	1.1	Zhang Y.Z. , PhD thesis, 2015
A86	102.39	29.17	1050	18	1	Zhang Y.Z. , PhD thesis, 2015
A87	102.38	29.25	890	28	2.2	Zhang Y.Z. , PhD thesis, 2015
A88	102.52	29.29	970	195	18	Zhang Y.Z. , PhD thesis, 2015
