# Supplementary material for: Southwestward growth of plateau surfaces in eastern Tibet
Source: Research Square preprint supplement (doi:10.21203/rs.3.rs-89539/v1), 2020-10-16
Supplement: Supplementary file 4 [file 8c127120c4eb0067fa2cbacc.xlsx]

## Sheet: Sheet1
Dataset S3. Zircon (U-Th)/He data.
Sample	Aliq.	He		U		Th		Th/U	grain mass (µg)	Ejection corr. (FT238)	Ejection corr. (FT235)	Ejection corr. (FT232)	Rs	[U] (ppm)	[Th] (ppm)	[eU] (ppm)	Uncorr. He age (Ma)	FT-Corr. He age (Ma)	Error (±2σ)	Weighted mean age (Ma)	Error (±2σ)
		vol. (ncc)	1σ (%)	mass (ng)	1σ (%)	mass (ng)	1σ (%)						(µm)
CD252	z1	0.74764	2.10076	1.44024	1.42914	0.799063	1.42735	0.569169	1.37	0.68004	0.636143	0.636143	36.6336	751.498	416.941	849.479	84.5638	125.139	6.16687	116.97	13.8
	*z2	2.3475	2.10286	6.90184	1.41923	7.90311	1.42409	1.1747	1.54	0.725507	0.686786	0.686786	43.387	2703.69	3095.93	3431.24	49.4648	68.9737	3.30854
	z3	1.88668	1.06214	4.05168	1.41638	2.90772	1.43008	0.736226	1.67	0.716174	0.676355	0.676355	41.8261	1647.8	1182.55	1925.7	73.4301	103.302	3.32787
	z4	7.19147	1.06227	12.8315	1.41772	3.76743	1.42408	0.301204	5.32	0.789013	0.758195	0.758195	57.6426	1774.56	521.023	1897	96.4631	122.462	4.12477
CD272	z1	0.35791	1.06453	1.36113	1.43072	0.338722	1.49754	0.255292	2.76976	0.751234	0.715624	0.715624	48.2906	357.787	89.0364	378.711	45.9193	61.3108	2.07899	60.2	10.4
	z2	0.184005	1.06872	0.902749	1.41823	0.289556	1.42803	0.329048	2.09194	0.716361	0.676564	0.676564	41.8564	362.856	116.386	390.206	35.0654	49.1808	1.64647
	z3	0.713157	1.06294	2.36405	1.43171	0.254973	1.43221	0.110645	2.87676	0.735545	0.698022	0.698022	45.1876	671.672	72.4428	688.696	54.3536	74.002	2.55755
	z4	0.3496	1.07691	1.55272	1.43669	0.250003	1.51843	0.165176	2.36894	0.714736	0.67475	0.67475	41.5946	550.746	88.6757	571.585	40.1282	56.2967	1.9435
CD274	z1	0.382659	1.07616	1.82989	1.41752	0.608975	1.42596	0.341405	3.91685	0.760115	0.725608	0.725608	50.2255	378.159	125.849	407.733	35.8773	47.3874	1.58714	50.6	4.4
	z2	0.413485	1.08715	2.05009	1.41882	0.25482	1.45086	0.127513	2.45211	0.733134	0.695322	0.695322	44.7429	654.86	81.397	673.988	36.2631	49.5737	1.71152
	z3	0.377986	1.10096	1.61053	1.42238	0.44302	1.43389	0.282196	3.85605	0.746604	0.710424	0.710424	47.3351	364.905	100.377	388.493	40.7654	54.7933	1.87031
	*z4	0.553049	1.09761	4.02048	1.41732	0.50909	1.43563	0.1299	3.7125	0.772392	0.739434	0.739434	53.1478	808.313	102.352	832.366	24.7452	32.1076	1.1096
CD276	z1	0.674537	1.07941	4.13512	1.42518	0.839193	1.42627	0.208194	6.88451	0.793513	0.763281	0.763281	58.9832	546.746	110.958	572.821	28.8269	36.4188	1.24247	37.03	0.6
	z2	1.01829	1.08884	5.81433	1.42025	1.20174	1.42823	0.212034	11.4906	0.827233	0.801511	0.801511	71.2431	445.494	92.0773	467.132	30.9172	37.45	1.27865
	z3	0.523413	1.07554	2.98619	1.42647	1.1492	1.4325	0.394795	8.29344	0.802172	0.773081	0.773081	61.734	337.606	129.924	368.138	29.7479	37.2213	1.24186
	*z4	0.903513	1.07076	3.14744	1.42402	0.844527	1.43468	0.275264	7.82732	0.802182	0.773092	0.773092	61.7375	387.979	104.103	412.444	49.895	62.3486	2.10705
*Ages were deemed outliers based on Dixon's q-test,and not used for weight mean age calculation and inverse modeling. Reported uncertainty 2σ is formal analytical precision based on propagation of analytical uncertainties on measurements of U, Th, Sm and He. Uncertainty on the weighted mean is doubled one standard deviation.
