# Supplementary material for: Southwestward growth of plateau surfaces in eastern Tibet
Source: Research Square preprint supplement (doi:10.21203/rs.3.rs-89539/v1), 2020-10-16
Supplement: Supplementary file 5 [file 9a7a669d51fa7893e3423486.xlsx]

## Sheet: Sheet1
Dataset S2. Apatite (U-Th)/He data.
Sample	Aliq.	4He (ncc)	Mass (mg)	U (ppm)	Th (ppm)	Sm (ppm)	[eU] (ppm)	Th/U ratio	Grain Length (μm)	Grain width (μm)	Rs (μm)	FT	Raw Age (Ma)	Corrected Age (Ma)	Error (±2σ)	Weighted mean age (Ma)	Error (±2σ)
CD253	a1	0.7728	0.00391189	41.1449	52.8029	186.627	53.5535	1.28334	153.6	101.3	50.65	0.741663	30.1328	41.1667	4.8	61.8603	20.2
	a2	0.5651	0.00250033	42.8035	55.4003	189.427	55.8225	1.29429	124.1	90.1	45.05	0.702285	33.0686	47.8525	5
	a3	1.6421	0.00402914	41.014	67.4872	190.588	56.8735	1.64547	128.5	112.4	56.2	0.748335	58.4264	79.2449	9.6
	a4	1.5386	0.00514358	29.8494	47.163	125.601	40.9327	1.58003	175.4	108.7	54.35	0.762851	59.5967	79.1771	9.6
CD255	a1	0.8049	0.00479585	35.6551	78.6942	194.336	54.1482	2.2071	255.3	87	43.5	0.73525	25.3273	35.109	4.2	30.7047	2.6
	a2	0.8592	0.00668583	28.7839	68.1909	164.175	44.8088	2.36906	282.8	97.6	48.8	0.763566	23.4366	31.2208	3.8
	a3	0.6079	0.00487811	31.7613	76.6672	178.315	49.778	2.41386	194.6	100.5	50.25	0.753614	20.4642	27.653	3.4
	a4	0.8257	0.00660538	29.8522	75.3029	169.241	47.5484	2.52253	223.6	109.1	54.55	0.775608	21.4895	28.167	3.4
	a5	1.3995	0.00999615	29.6139	70.6057	175.974	46.2062	2.38421	284.9	118.9	59.45	0.799944	24.7539	31.3739	3.8
CD260	a1	0.5451	0.00285061	17.6613	136.993	153.148	49.8547	7.75667	152.8	86.7	43.35	0.708612	31.3613	46.0256	5.6	46.1396	10.2
	a2	0.3838	0.00182075	28.6342	188.085	138.818	72.8342	6.56855	135.8	73.5	36.75	0.659785	23.7055	37.6406	4.6
	a3	0.3132	0.00171282	22.3547	155.915	159.274	58.9947	6.9746	116.4	77	38.5	0.65988	25.3615	40.3054	4.8
	a4	1.0411	0.00138103	60.678	468.935	448.911	170.878	7.72826	117.9	68.7	34.35	0.630077	36.0828	60.5867	7.2
CD270	a1	0.1115	0.00123518	36.3409	119.914	490.16	64.5208	3.2997	124.6	63.2	31.6	0.609635	11.3878	19.4937	2.4	14.8229	3.6
	a2	0.0294	0.00125316	14.3737	50.5069	264.677	26.2428	3.51384	133.5	61.5	30.75	0.606292	7.25639	12.5155	1.6
	a3	0.078	0.00218403	14.9307	57.2377	242.576	28.3815	3.83357	155.2	75.3	37.65	0.675243	10.2311	15.6814	1.8
	a4	0.1628	0.00333945	27.5657	92.1723	296.085	49.2262	3.34373	188	84.6	42.3	0.715035	8.078	11.6009	1.4
CD272	a1	1.6752	0.0144155	34.2327	71.286	250.321	50.9849	2.08239	267.7	147.3	73.65	0.821016	18.6034	22.659	2.4	24.3119	5
	a2	2.7731	0.0221535	31.7428	18.4781	223.338	36.0851	0.582118	321.6	166.6	83.3	0.847931	28.2436	33.3088	3.6
	a3	1.0764	0.0169132	30.318	13.5804	241.433	33.5094	0.447931	329.1	143.9	71.95	0.830155	15.461	18.6242	2
	a4	1.2718	0.0149925	33.1883	19.4687	226.285	37.7635	0.586611	245.7	156.8	78.4	0.8307	18.3091	22.0406	2.4
	a5	3.5123	0.0188938	62.4343	42.34	465.604	72.3842	0.678153	306.5	157.6	78.8	0.839129	20.917	24.927	2.8
CD273	a1	1.7423	0.0279682	16.533	14.8423	230.393	20.021	0.897737	439.1	160.2	80.1	0.850421	25.1784	29.607	3.2	28.4401	3.6
	a2	0.9842	0.029196	10.9831	7.12671	178.133	12.6578	0.648881	353.2	182.5	91.25	0.861034	21.4896	24.9579	2.8
	a3	2.0229	0.0301212	16.9401	15.3033	232.296	20.5364	0.903375	372.1	180.6	90.3	0.860538	26.4663	30.7555	3.4
	*a4	2.8163	0.0184975	25.5669	25.2256	363.664	31.4949	0.986651	301.6	157.2	78.6	0.837188	39.0739	46.6728	5.2
CD274	a1	8.8277	0.0227278	158.925	26.6651	245.24	165.191	0.167785	430.2	145.9	72.95	0.840448	19.268	22.9259	2.6	19.6663	2.8
	a2	4.4487	0.0200175	121.835	30.2496	168.245	128.944	0.248283	331	156.1	78.05	0.842067	14.1337	16.7845	1.8
	a3	8.8424	0.0345171	128.149	17.9407	209.961	132.366	0.139998	372.6	193.2	96.6	0.870376	15.8626	18.225	2
	a4	8.6546	0.0258541	150.76	15.6584	207.91	154.44	0.103863	342.5	174.4	87.2	0.857087	17.7673	20.7299	2.2
CD275	a1	0.335	0.0063314	25.1896	12.0361	197.9	28.0181	0.477819	241.4	102.8	51.4	0.767798	15.3759	20.147	2.4	24.973	4.8
	a2	0.6166	0.0059083	30.0053	34.7232	342.789	38.1653	1.15724	249.4	97.7	48.85	0.750655	22.2011	29.5756	3.2
	a3	0.2682	0.00593971	17.5924	20.1606	230.489	22.3301	1.14598	199.6	109.5	54.75	0.762985	16.3981	21.492	2.4
	a4	0.5736	0.00605077	27.2298	35.0218	310.65	35.46	1.28615	230.7	102.8	51.4	0.757111	21.712	28.6775	3.2
CD276	a1	0.9864	0.0162	36.12	8.59	183.05	38.1386	0.24	331.5	140.15	70.075	0.81	13.1	15.8	1.4	17	1.2
	a2	0.5742	0.0066	51.57	13.69	251.82	54.7871	0.27	260.4	100.75	50.375	0.73	13	17.1	1.6
	a3	1.0217	0.0058	96.48	25.3	371.88	102.425	0.26	227.5	101.4	50.7	0.73	14	18.5	1.6
	a4	0.0007	0.0058	0.24	0.23	0.16	0.29405	0.98	248.8	96.95	48.475	0.72	3.4	4.5	0.4
	a5	2.0818	0.0112	105.96	32.46	497.2	113.588	0.31	269.7	129.15	64.575	0.78	13.4	16.6	1.4
CD277	a1	1.9837	0.0068	153.84	28.52	372.43	160.542	0.19	204.2	115.55	57.775	0.75	15	19.2	1.8	18.6	0.8
	a2	3.1179	0.0117	133.96	23.12	308.4	139.393	0.17	265	133.35	66.675	0.79	15.7	19.3	1.8
	a3	3.5693	0.0134	138.35	31.42	353.46	145.734	0.23	289.6	136.3	68.15	0.8	15	18.3	1.6
	a4	1.7882	0.0098	102.22	16.18	221.91	106.022	0.16	258.2	123.75	61.875	0.78	14.1	17.6	1.6
CD279	a1	0.1827	0.00366444	32.8486	59.0742	215.747	46.7311	1.79838	163.6	95	47.5	0.720305	8.71736	12.1023	1.4	12.4632	1.8
	a2	0.1675	0.00235295	41.164	78.9151	313.772	59.7091	1.91709	146.3	80.5	40.25	0.67325	9.73306	14.4568	1.6
	a3	0.1874	0.0022647	56.5645	84.8097	308.199	76.4948	1.49934	149.6	78.1	39.05	0.669078	8.845	13.2197	1.4
	a4	0.1702	0.00576075	22.2436	39.9711	133.898	31.6368	1.79697	197.9	108.3	54.15	0.757838	7.63457	10.0742	1.2
CD280	a1	0.3114	0.00204022	70.2596	51.6163	207.99	82.3895	0.734651	153	73.3	36.65	0.658508	15.1678	23.0336	2.6	27.4079	3.6
	a2	0.1375	0.00176503	23.8678	60.9508	184.996	38.1913	2.55368	158.9	66.9	33.45	0.623649	16.6527	26.702	3
	a3	0.196	0.00195448	26.8581	50.6229	213.122	38.7545	1.88483	144.2	73.9	36.95	0.649502	21.1012	32.4882	3.6
	a4	0.1903	0.00211132	18.9128	36.1645	205.613	27.4114	1.91217	159.2	73.1	36.55	0.653047	26.7376	40.9429	4.6
CD282	a1	1.6373	0.00527512	119.147	18.8646	207.355	123.581	0.15833	213.4	99.8	49.9	0.753998	20.5743	27.2869	3	28.6903	3
	a2	2.0907	0.00597005	108.703	17.5097	164.472	112.818	0.161078	218.6	104.9	52.45	0.764782	25.4238	33.2432	3.6
	a3	1.9395	0.00748906	96.144	17.7255	176.496	100.309	0.184364	209.9	119.9	59.95	0.786484	21.1463	26.8871	3
	a4	3.3545	0.00854441	143.481	20.5715	238.343	148.315	0.143375	237.1	120.5	60.25	0.792999	21.6836	27.3438	3
* Ages were deemed outliers based on Dixon's q-test,and not used for weight mean age calculation, statistic computating and inverse modeling. Reported uncertainty 2σ is formal analytical precision based on propagation of analytical uncertainties on measurements of U, Th, Sm and He. Uncertainty on the weighted mean is doubled one standard deviation.
